# Supplementary material for: Are perceived barriers to accessing mental healthcare associated with socioeconomic position among individuals with symptoms of depression? Questionnaire-results from the Lolland-Falster Health Study, a rural Danish population study
Source: PubMed Central journal article supplement — BMJ Open. 2019 Mar 15;9(3):e023844. doi: 10.1136/bmjopen-2018-023844 (PMC6429864; doi:10.1136/bmjopen-2018-023844), 2019-03-15
Supplement: bmjopen-2018-023844.draft_revisions.pdf [file bmjopen-2018-023844.draft_revisions.pdf]

# BMJ Open

BMJ Open is committed to open peer review. As part of this commitment we make the peer review history of every article we publish publicly available.

When an article is published we post the peer reviewers' comments and the authors' responses online. We also post the versions of the paper that were used during peer review. These are the versions that the peer review comments apply to.

The versions of the paper that follow are the versions that were submitted during the peer review process. They are not the versions of record or the final published versions. They should not be cited or distributed as the published version of this manuscript.

BMJ Open is an open access journal and the full, final, typeset and author-corrected version of record of the manuscript is available on our site with no access controls, subscription charges or pay-per-view fees (<http://bmjopen.bmj.com>).

If you have any questions on BMJ Open's open peer review process please email [info.bmjopen@bmj.com](mailto:info.bmjopen@bmj.com)

# BMJ Open

## Socioeconomic position and perceived barriers to accessing mental health care for individuals with symptoms of depression: Results from the Lolland-Falster Health Study.

|                               |                                                                                                                                                                                                                                                                                                                                                                                                                     |
|-------------------------------|---------------------------------------------------------------------------------------------------------------------------------------------------------------------------------------------------------------------------------------------------------------------------------------------------------------------------------------------------------------------------------------------------------------------|
| Journal:                      | <i>BMJ Open</i>                                                                                                                                                                                                                                                                                                                                                                                                     |
| Manuscript ID                 | bmjopen-2018-023844                                                                                                                                                                                                                                                                                                                                                                                                 |
| Article Type:                 | Research                                                                                                                                                                                                                                                                                                                                                                                                            |
| Date Submitted by the Author: | 28-Apr-2018                                                                                                                                                                                                                                                                                                                                                                                                         |
| Complete List of Authors:     | Packness, Aake; Syddansk Universitet Det Sundhedsvidenskabelige Fakultet, Public Health; Psykiatrien i Region Sjælland, Psychiatric Research Unit<br>Halling, Anders; Lund University, Clinical sciences Malmö, CRC<br>Simonsen, Erik<br>Waldorff, Frans; University of Southern Denmark, Research Unit for General Practice, Health Science Department<br>Hastrup, Lene; Psychiatric Research Unit, Region Zealand |
| Keywords:                     | Depression & mood disorders < PSYCHIATRY, MENTAL HEALTH, Organisation of health services < HEALTH SERVICES ADMINISTRATION & MANAGEMENT, PRIMARY CARE, PUBLIC HEALTH                                                                                                                                                                                                                                                 |
|                               |                                                                                                                                                                                                                                                                                                                                                                                                                     |

SCHOLARONE™  
Manuscripts

Peer Review Only

# Socioeconomic position and perceived barriers to accessing mental health care for individuals with symptoms of depression: Results from the Lolland-Falster Health Study.

A Packness, A Halling, E Simonsen, FB Waldorff, LH Hastrup

Department of Public Health, University of Southern Denmark, DK-5000 Odense, Denmark. Aake Packness, MPH, Research Unit for General Practice, University of Southern Denmark. Anders Halling, professor, Department of Medicine and Optometry, Faculty of Health and Life Sciences, Linnaeus University, SE-391 85 Kalmar, Sweden, Sweden.; Erik Simonsen, professor, Department of Clinical Medicine, University of Copenhagen, Psychiatric Research Unit, Region of Zealand, Denmark; Frans B Waldorff, professor, Department of Public Health, University of Southern Denmark, DK-5000 Odense, Denmark. Lene H Hastrup, senior researcher, Psychiatric Research Unit, Region of Zealand, DK-4200 Slagelse, Denmark.

Correspondence to: A Packness [apackness@health.sdu.dk](mailto:apackness@health.sdu.dk)  
ORCID-0000-0002-4695-6214

Research Unit of General Practice, Institute of Public Health, J.B. Winsløvs Vej 9A, DK-5000 Odense C, Denmark. Telephone: +45 20537264

Word count 4,670 (excl. tables)/ 5,386 (incl. tables)

The Corresponding Author has the right to grant on behalf of all authors and does grant on behalf of all authors, an exclusive licence on a worldwide basis to the BMJ Publishing Group Ltd to permit this article (if accepted) to be published in BMJ editions and any other BMJ PGL products and sub-licences such use and exploit all subsidiary rights, as set out in our licence.

All authors have completed the Unified Competing Interest form (available on request from the corresponding author) and declare: no support from any organisation for the submitted, no financial relationships with any organisations that might have an interest in the submitted work in the previous three years, and no other relationships or activities that could appear to have influenced the submitted work.

Funding: The study has been supported by an unrestricted grant (No 15-000342) from the Health Research Foundation of Region Zealand.

## Transparency declaration

Aake Packness affirms that this manuscript is an honest, accurate, and transparent account of the study being reported, that no important aspects of the study have been omitted, and that any discrepancies from the study as planned have been explained.

## Abstract

**Objective:** To evaluate if perceived barriers to accessing mental health care (MHC) among individuals with symptoms of depression are associated with their socioeconomic position (SEP).

**Design:** Cross-sectional questionnaire-based population survey from the Lolland-Falster Health Study (LOFUS) 2016-17 including 5,076 participants.

**Participants:** The study included 372 individuals who scored positive for depression in the Major Depression Inventory (MDI).

**Interventions:** A set of five questions on perceived barriers to accessing professional care for a mental health problem was prompted to individuals responding with symptoms of depression (MDI score >20).

**Outcomes:** The association between SEP (as measured by education, employment status, and financial strain) and five different types of barriers to accessing MHC were analysed in separate multivariable logistic regression models adjusted for gender and age.

**Results:** 314 out of 372 (84%) completed the survey questions and reported experiencing barriers to MHC access. Worry about expenses related to seeking or continuing MHC was a considerable barrier for 30% of the individuals responding, and as such the greatest problem. 22% perceived stigma as a barrier to accessing MHC, but there was no association between perceived stigma and SEP. Transportation was the barrier of least concern for individuals in general, but also the issue with greatest and most consistent socioeconomic disparity (odds ratio (OR) 2.99; confidence interval (CI) 1.19 – 7.52) for lowest vs highest educational groups, and likewise concerning expenses (OR 2.77, CI 1.34 – 5.76) for the same groups.

**Conclusion:** Issues associated with *Expenses* and *Transport* are more frequently perceived as barriers to accessing MHC for people in low SEP compared to people in high SEP. Stigma showed no association to SEP.

Informed written consent was obtained. Region Zealand's Ethical Committee on Health Research (SJ-421) and the Danish Data Protection Agency (REG-24-2015) approved the study.

### Strengths and limitations of this study:

- A strength of this study is that it is a population study in a socioeconomically-deprived area and combines data on present depression scores and SEP with proportions of perceived barriers to accessing mental health care services; thus, the study can shed light on factors that deter individuals with symptoms of depression from seeking MHC services.
- The questions used to assess barriers to accessing mental health care are not standardized, although they were validated for content and do have external validity.
- There was a potential overlap in the questions, between transportation barriers and barriers of expenses related to seeking or continuing mental health care services. Thus it was not clear whether "expenses" included "transport expenses" and whether transport was a logistical or economical barrier.

## Introduction

Major depressive disorders (MDD) rank third among leading causes of years lived with disability (YLD) in high-income countries, as MDD is common and has an early onset.<sup>1</sup> Mental health problems in early age can have a profound impact on educational achievements<sup>2</sup>, on income<sup>3</sup>, and on later unemployment<sup>4</sup>. Additionally, having a diagnosis of depression is associated with a substantially shorter life expectancy<sup>5</sup>.

In spite of this, far from all people suffering from depression are treated. In a Norwegian survey study only 12% of respondents with symptoms of depression had ever sought help<sup>6</sup>, and a Canadian study found that 40% with symptoms of depression or anxiety perceived an unmet need for care<sup>7</sup>. Generally, treatment of patients suffering from depression is insufficient even in high-income countries, as only one in five receives adequate treatment<sup>8</sup>.

Depressive disorders are closely associated with socioeconomic position (SEP). A dose response relationship has been found between income as well as education on incidence, prevalence, and persistence of depression<sup>9</sup>. Likewise, studies have found negative socioeconomic changes increase the risk of incidents of mental disorders, particularly of mood disorders<sup>10</sup>, and financial strain in itself is associated with depressive disorder<sup>11</sup><sup>12</sup>.

Thus, people in low SEP may have a higher need for mental health care due to increased incidence and prevalence of depression. A recent study found predictors of need for highly-specialized MDD care to be: depression severity, younger age at onset, prior poor treatment response, psychiatric comorbidity, somatic comorbidity, childhood trauma, psychosocial impairment, older age, and a socioeconomically disadvantaged status<sup>13</sup>. Although people in low SEP have an increased need for mental health services, it is not evident that they use more specialized care. Some studies have found access to specialist care to be based on clinical need, with little inequity in SEP<sup>14 15 16</sup>, whereas others report specialized mental health services are not provided equally to persons in low SEP according to need<sup>17 18 19</sup> or that higher SEP is associated with more usage of specialized mental health services<sup>20 21</sup>.

The background for initiating the present study was that health care statistics (unpublished) in 2013 revealed a significant disparity, as the most socioeconomically deprived municipality in Denmark (Lolland), had 20% fewer individuals in contact with out-patient mental health care (psychologist, private or public psychiatry) than could be expected for the population size (unpublished). Several reasons may account for this discrepancy between expected need and actual use of mental health care services, one of them being perceptions of barriers that affect patients' choices or preferences, which we aimed to address in this study.

1  
2  
3  
4 The study objective was to evaluate if perceived barriers to accessing mental health care differ across  
5 individuals with symptoms of depression according to SEP. We thereby expected to gain knowledge valuable to  
6 addressing inequity in the use of mental health care services.  
7

## 8 **Method**

### 9 *Study design*

10 The study was conducted as a cross-sectional questionnaire-based population survey.  
11  
12

### 13 *Setting*

14 The Danish health care system is tax-funded and free at delivery for both primary and secondary care; for  
15 adults, dental care and psychotherapy are only partly subsidized<sup>22</sup>. The general practitioner (GP) fulfills a  
16 gatekeeper function, as specialized care is only free after GP referral. Psychotherapy by a psychologist is  
17 subsidized for patients referred by a GP for specific conditions: reaction to specific traumatic events; moderate  
18 depression; and, specifically for citizens between 18 and 38 years old, moderate anxiety disorders. In 2014, the  
19 out of pocket cost to individuals at time of service was equivalent to 52€ for the first consultation and 44€ for  
20 the following sessions<sup>23</sup>.  
21  
22  
23

### 24 *Study population and data sources*

25 The Lolland-Falster Health Study (LOFUS) is a population survey conducted in the two remote municipalities of  
26 Lolland and Guldborgsund, located in a socioeconomically deprived area of Denmark that is a 1½-2 hours' drive  
27 south from the capital Copenhagen. In the 2017 national ranking of all 98 municipalities these two were ranked  
28 the most deprived and the 8<sup>th</sup> most deprived municipalities<sup>24</sup>. Together, the municipalities comprise 103,000  
29 citizens, 50% being 50 years of age or older<sup>25</sup> in 2017. The study aims to enroll 25,000 participants of all ages  
30 and will be conducted from 2016 to 2020. Participants are randomly selected by civil registration numbers<sup>26</sup>,  
31 invited by mail, and re-invited by phone. The study covers several health areas: mental health, health literacy,  
32 social issues, genetics, kidney, ear nose & throat problems, and more. Beyond questionnaire responses, LOFUS  
33 data contains blood samples and biometrics. The study is described in detail elsewhere<sup>27</sup>. The present study  
34 relies on responses to the questionnaire from adults, with data drawn from LOFUS at the end of 2017, while  
35 data collection was still ongoing.  
36  
37  
38  
39

40  
41 The subjects included in this study are respondents with symptoms of depression. All respondents who scored  
42 >20 on the Major Depression Inventory (MDI) were prompted the specific questions on perceived barriers to  
43 seeking help for mental health problems, which are described below.  
44

### 45 *Independent variables*

#### 46 *Major Depression Inventory*

47 As part of the LOFUS questionnaire, the respondents filled out the Major Depression Inventory (MDI). The MDI  
48 is based on the 12-item Likert scale and has been found to have an adequate internal and external validity for  
49 defining different stages of depression<sup>28</sup>. The MDI is based on the ICD-10 diagnostic criteria for depressive  
50 disorder<sup>29</sup>, with scores ranging from 0 to 50. We used the sum score after excluding the lowest score on  
51 question 8 or 9 and likewise the lowest score on item 11 or 12, which measured increased/decreased  
52 restlessness and increased/decreased appetite, respectively. Mild depression is covered by scores from 21 –  
53  
54  
55  
56  
57  
58  
59

1  
2  
3  
4 25, moderate depression from 26 – 30 and severe depression by scores from 31 – 50<sup>30</sup>. If more than two items  
5 were missing in the MDI, the score was categorized as missing<sup>31</sup>.  
6  
7

### 8 *Socioeconomic position*

9 SEP was measured by employment status, educational attainment, and financial strain.  
10

11 Employment status was gathered using 14 different items in the questionnaire. Respondents over the age of 67  
12 were categorized as retired, unless they were employed. The categories of employment were reduced to four  
13 in the analyses: Working (employee; self-employed; combined employee and self-employed; military;  
14 secondary school pupil; postsecondary student; apprentice; house-wife/husband); Temporary not working  
15 (unemployed; rehabilitation; sickness leave 3 months or more); Retired (retired due to age; disability benefit;  
16 early retirement); and Other (Other).  
17  
18  
19

20 Educational attainment was measured and classified as the following: *no postsecondary education* if the  
21 respondent did not complete any postsecondary education; *1-3 years postsecondary education* for vocational  
22 or academy/professional graduates of 1 - 3 years; *3+ postsecondary education* for baccalaureate matriculants  
23 who completed 3 - 4 years; and *academic* for those who completed graduate study of  $\geq 5$  years.  
24  
25

26 The questionnaire gathered responses concerning financial strain with the following question: *How often*  
27 *within the last 12 months have you had problems paying your bills?* With possible answers: *Never; Few months;*  
28 *Approximately half the months in the year; Every month.* In the analysis, the categories were reduced to three  
29 to gain power, merging *Approximately half the months in the year* and *Every month* into one category.  
30  
31

### 32 **Extrinsic variables:**

33 Sociodemographic variables included were gender, age, marital status, and cohabitation.  
34

35 Questions on *Self-perceived general health* (SRH) were provided to respondents with a five-point Likert scale  
36 from *very good* to *very bad*. In addition, the presence of a *Long-standing health problem* was posed as a binary  
37 question and *General activity limitation* was gauged in three grades from *severely limited* to *not at all*. These  
38 questions were adopted from the European Health Status Module<sup>32</sup>.  
39  
40

41 The questionnaire included inquiries regarding past and present medical problems; specifically concerning  
42 mental health status, the respondents were asked if they presently suffered or had ever suffered from anxiety  
43 disorder and/or depression.  
44  
45

### 46 **Dependent variables**

47 We developed a short list of questions to be included in the LOFUS questionnaire for respondents who scored  
48 positive for symptoms of depression. The questions were inspired by the *Barriers to Access to Care Evaluation*  
49 (BACE) questionnaire by Sara Clement et al.<sup>33</sup>. Their questionnaire contains 30 items, which was too many to  
50 include in the LOFUS study. The number of questions was reduced and grouped to cover the individual abilities  
51 in approaching care as described by Levesque et al.<sup>34</sup>: ability to perceive; ability to seek; ability to reach; ability  
52 to pay; and ability to engage (see supplementary material on Levesque et al.'s *Model of a conceptual*  
53  
54  
55  
56  
57  
58  
59  
60

1  
2  
3  
4 *framework of access to health care* and how the BACE-questions were reduced to five in suppl. table 1). A  
5 preliminary question on whether considering seeking care had ever been a problem was prompted before the  
6 five questions related to the abilities/perceived barriers:

7 *Have any of the reasons listed below prevented, delayed, or discouraged you from getting or continuing*  
8 *professional care for a mental health problem?*

9 *It has had an impact, that I ..*

- 10 1) ... *have been unsure what to do to get professional care.* (termed "Knowledge" in the following)
- 11 2) ... *have been concerned for what others might think, say or do.* (termed "Stigma")
- 12 3) ... *have had difficulty with transport or travelling for treatment.* (termed "Transport")
- 13 4) ... *have not been able to afford the expenses that followed.* (termed "Expense")
- 14 5) ... *have had bad experiences with professional care for mental health problems.* (termed "Experience")
- 15 6) *These questions are not relevant for me/I do not want to answer.*

16  
17  
18  
19  
20 Answers to question 1 – 5 were listed in four grades ranging from *Not at all* to *Quite a lot*; question 6 was  
21 binary.

22  
23 In a preliminary form, the questions were evaluated for content validity in a focus group interview consisting of  
24 a group of ten patients and relatives of psychiatric patients (the Panel of Relatives and Patients of Psychiatry  
25 Services in Region Zealand) in December 2014. The group found the themes relevant and the questions  
26 understandable. They offered some suggestions for rephrasing, which were subsequently followed. The same  
27 panel commented on the preliminary results of the study in December 2017.

### 30 **Statistical analysis**

31 For respondents with symptoms of depression we estimated the association between SEP and the outcome  
32 variables (five types of barriers to MHC: knowledge; stigma; transport; expense; experience) in separate  
33 multivariable logistic regression models after excluding respondents replying *Not relevant*. Likewise, we  
34 performed the same analyses with the three grades of depression (mild, moderate and severe) and depression  
35 score uncategorized (MDI score) as independent variables, which is presented as supplementary material. The  
36 SEP categories were employment status, education, and financial strain. *Working, postsecondary education,*  
37 *and no economic distress* were used as reference categories.

38  
39  
40  
41  
42 The logistic regression models were adjusted for age (18-59 versus 60+) and gender in addition to the variables  
43 studied in the univariate (crude) analysis.

44  
45 The significance level used was 5% throughout, and all reported confidence intervals were 95%. All statistical  
46 analyses were done in Stata 15<sup>35</sup>.

### 48 **Patient and Public Involvement**

49  
50 The study objectives were discussed with the members of the Panel of Relatives and Patients of Psychiatry  
51 Services in Region Zealand along with the validation of the questions in December 2014. The preliminary  
52 results were discussed with the group again in December 2017. The final results were distributed to the group  
53 in February 2018 along with an invitation for additional comments. One member of the patient panel  
54  
55  
56  
57  
58  
59  
60



1  
2  
3  
4 responded to the invitation and provided additional comments/discussion. Comments from patients are  
5 included in the discussion.

6  
7 The published article will also be distributed to the patient panel.  
8  
9  
10

## 11 **Ethics**

12  
13 Informed, written consent was obtained from all participants. The study – along with the Lolland-Falster Health  
14 Study – was approved by Region Zealand's Ethical Committee on Health Research (SJ-421) and the Danish Data  
15 Protection Agency (REG-24-2015).  
16  
17

## 18 **Results**

19  
20  
21  
22 *Figure 1: Flow chart of sampling from Lolland-Falster Health Study*  
23  
24  
25

26 By December 21, 2017, a total of 20,680 adults (age 18+) had been invited to the LOFUS study. By December  
27 31, 2017, a total of 5,395 adults had replied to the questionnaire. 319 did not reply on the MDI score element  
28 or failed to fill in more than two answers in the test, leaving 5,076, of whom 372 (7.3%) reported symptoms of  
29 depression and thus were prompted the questions on perceived barriers to seeking mental health care. 58  
30 replied that the questions were not relevant or would not answer them, thus 314 individuals with a MDI score  
31 >20 were included in the analyses of SEP and perceived barriers (Figure 1).  
32  
33  
34  
35  
36  
37  
38  
39  
40  
41  
42  
43  
44  
45  
46  
47  
48  
49  
50  
51  
52  
53  
54  
55  
56  
57  
58  
59  
60

Table 1. Characteristics of study sample and respondents with symptoms of depression

| Table 1. Characteristics of study sample and respondents with symptoms of depression |              |             |             |      |                        |      |  |
|--------------------------------------------------------------------------------------|--------------|-------------|-------------|------|------------------------|------|--|
| Age group                                                                            | Total sample |             |             |      | Symptoms of depression |      |  |
|                                                                                      | Male         | Female      | Total       | Pct  | MDI > 20               | Pct  |  |
| 18-29                                                                                | 198          | 212         | 410         | 8,1  | 55                     | 14,8 |  |
| 30-39                                                                                | 180          | 250         | 430         | 8,5  | 41                     | 11,0 |  |
| 40-49                                                                                | 357          | 443         | 800         | 15,8 | 82                     | 22,0 |  |
| 50-59                                                                                | 519          | 681         | 1200        | 23,6 | 84                     | 22,6 |  |
| 60-69                                                                                | 632          | 666         | 1298        | 25,6 | 63                     | 16,9 |  |
| 70-79                                                                                | 396          | 371         | 767         | 15,1 | 41                     | 11,0 |  |
| 80+                                                                                  | 95           | 76          | 171         | 3,4  | 6                      | 1,6  |  |
| <b>Sum</b>                                                                           | <b>2377</b>  | <b>2699</b> | <b>5076</b> |      | <b>372</b>             |      |  |
| <b>Marital status</b>                                                                |              |             |             |      |                        |      |  |
| Married                                                                              | 1538         | 1708        | 3246        | 64,5 | 181                    | 49,6 |  |
| Partnership                                                                          | 73           | 108         | 181         | 3,6  | 15                     | 4,1  |  |
| Separated                                                                            | 12           | 9           | 21          | 0,4  | 5                      | 1,4  |  |
| Divorced                                                                             | 169          | 195         | 364         | 7,2  | 31                     | 8,5  |  |
| Widower                                                                              | 59           | 164         | 223         | 4,4  | 11                     | 3,0  |  |
| Not married                                                                          | 509          | 487         | 996         | 19,8 | 122                    | 33,4 |  |
| <b>Cohabiting</b>                                                                    |              |             |             |      |                        |      |  |
| Yes                                                                                  | 1917         | 2141        | 4058        | 80,7 | 248                    | 67,9 |  |
| <b>Secondary schooling</b>                                                           |              |             |             |      |                        |      |  |
| Studying                                                                             | 20           | 34          | 54          | 1,1  | 5                      | 1,3  |  |
| < 8 years                                                                            | 290          | 203         | 493         | 9,7  | 35                     | 9,4  |  |
| 8 - 9 years                                                                          | 610          | 401         | 1011        | 19,9 | 87                     | 23,4 |  |
| 10 - 11 years                                                                        | 751          | 913         | 1664        | 32,8 | 112                    | 30,1 |  |
| High school                                                                          | 522          | 896         | 1418        | 27,9 | 89                     | 23,9 |  |
| Other/foreign                                                                        | 163          | 215         | 378         | 7,4  | 38                     | 10,2 |  |
| <b>Postsecondary education</b>                                                       |              |             |             |      |                        |      |  |
| No postsecondary                                                                     | 415          | 529         | 944         | 18,6 | 112                    | 30,1 |  |
| 1-3 years postsecondary                                                              | 1307         | 1238        | 2545        | 50,1 | 172                    | 46,2 |  |
| 3+ years postsecondary                                                               | 495          | 784         | 1279        | 25,2 | 63                     | 16,9 |  |
| Other                                                                                | 143          | 122         | 265         | 5,2  | 21                     | 5,6  |  |
| <b>Occupational status</b>                                                           |              |             |             |      |                        |      |  |
| Work/study                                                                           | 1417         | 1526        | 2943        | 58,0 | 167                    | 44,9 |  |
| Temp. No work                                                                        | 68           | 121         | 189         | 3,7  | 63                     | 16,9 |  |
| Retired                                                                              | 843          | 966         | 1809        | 35,6 | 115                    | 30,9 |  |
| Other                                                                                | 47           | 77          | 124         | 2,4  | 27                     | 7,3  |  |
| <b>Financial strain</b>                                                              |              |             |             |      |                        |      |  |
| Not at all                                                                           | 2136         | 2404        | 4540        | 89,4 | 275                    | 73,9 |  |
| Few months                                                                           | 175          | 213         | 388         | 7,6  | 60                     | 16,1 |  |
| Half the months                                                                      | 23           | 22          | 45          | 0,9  | 13                     | 3,5  |  |
| Every month                                                                          | 25           | 32          | 57          | 1,1  | 19                     | 5,1  |  |
| <b>Self-rated health</b>                                                             |              |             |             |      |                        |      |  |
| Very good                                                                            | 306          | 328         | 634         | 12,5 | 7                      | 1,9  |  |
| Good                                                                                 | 1348         | 1524        | 2872        | 56,6 | 83                     | 22,3 |  |
| Fair                                                                                 | 616          | 697         | 1313        | 25,9 | 181                    | 48,7 |  |
| Bad                                                                                  | 89           | 137         | 226         | 4,5  | 90                     | 24,2 |  |
| Very bad                                                                             | 12           | 6           | 18          | 0,4  | 9                      | 2,4  |  |
| <b>General activity limitation</b>                                                   |              |             |             |      |                        |      |  |
| Not limited at all                                                                   | 1561         | 1630        | 3191        | 63,2 | 114                    | 31,0 |  |
| Limited but not severely                                                             | 672          | 906         | 1578        | 31,3 | 166                    | 45,1 |  |
| Severely limited                                                                     | 132          | 146         | 278         | 5,5  | 88                     | 23,9 |  |
| <b>Longstanding illness. Yes</b>                                                     | 1052         | 1200        | 2252        | 44,7 | 244                    | 66,3 |  |
| <b>Anxiety, now or earlier. Yes</b>                                                  | 110          | 223         | 333         | 6,6  | 111                    | 29,8 |  |
| <b>Depression, now or earlier. Yes</b>                                               | 145          | 230         | 375         | 7,4  | 138                    | 37,1 |  |
| <b>Medication anxiety. Yes</b>                                                       | 71           | 119         | 190         | 3,8  | 65                     | 17,8 |  |
| <b>Medication antidepressants. Yes</b>                                               | 85           | 173         | 258         | 5,1  | 66                     | 18,0 |  |

1  
2  
3  
4  
5  
6 The total sample consisted of 53% women; 64.5% of the respondents were married, and 80.7% were  
7 cohabitating (table 1). For the total group, mean age was 55.7 and median age was 57.4; for individuals scoring  
8 in the depressed range on the MDI, the mean age was 50.2 and the median was 51.4 years.  
9

10  
11 Compared to the total sample, the respondents reporting symptoms of depression were younger, and more  
12 likely to be living alone, and to be unmarried. They were also more likely to have no postsecondary education,  
13 to be temporarily out of work (16.9% vs 3.7%), and to experience more frequent financial strain. Furthermore,  
14 their health indicators included: lower self-rated health, more reports of limited physical functioning, more  
15 reports of long lasting disease, and former anxiety or depression diagnoses; and more reports to be currently in  
16 pharmacological treatment for these disorders.  
17  
18

19  
20 *Figure 2. Responses on perceived barriers to accessing mental health care, proportions*  
21

22  
23  
24 Of those responding to the questions, more than half perceived no problems at all in accessing professional  
25 care, least of all transport.  
26

27 Among those who did have concerns about accessing or continuing professional mental health care, *Expense*  
28 was the most common problem, as 30.1% indicated expenses had prevented, deterred, or delayed them either  
29 *Quite a lot* or *A lot* (both responses aggregated in the *Quite a lot +* category in Figure 2). Likewise, the second  
30 most common concern was related to *Stigma*, phrased in the questionnaire as “what others might think, say or  
31 do”, which was a serious concern for 22.3%; approximately the same proportion (21.2%) had concerns related  
32 to *Knowledge*, or how to find help for a mental health problem. Transport was not a problem for 78.6%, with  
33 only 11.7% reporting it negatively affected access.  
34  
35  
36

37 Perceived barriers to accessing health care by SEP are shown in Table 2 (crude numbers are shown in  
38 Supplementary Table 2). Perceptions of *Stigma* did not show any significant difference across the  
39 socioeconomic groups, however measured. *Lack of Knowledge* was a significant problem for respondents  
40 without postsecondary education compared to those who had completed some postsecondary education  
41 (adjusted odd ratio (aOR) 2.26 confidence interval (CI) 1.1- 4.6) and for respondents with occasional (*Few*  
42 *months*), but not regular, financial strain when compared to those with no financial strain. Low SEP as  
43 measured by educational level and financial strain was associated with perceived barriers concerning *Transport*  
44 and *Expense*; whereas low SEP measured by employment status alone was associated with concerns related to  
45 *Transport*. The retired respondents were more likely to perceive *Bad Experience* as a barrier to seeking or  
46 continuing MHC compared to respondents who were working. *Transport* showed the greatest disparity across  
47 the socioeconomic groups.  
48  
49  
50  
51  
52  
53  
54  
55  
56  
57  
58  
59  
60

Table 2. Adjusted odds ratios for perceived barriers for accessing MHC by three indicators of SEP

| Table 2. Adjusted odds ratios for five perceived barriers accessing mental health care by employment status, education, and financial strain |                   |              |               |     |                  |              |              |               |                  |              |              |               |
|----------------------------------------------------------------------------------------------------------------------------------------------|-------------------|--------------|---------------|-----|------------------|--------------|--------------|---------------|------------------|--------------|--------------|---------------|
| Stigma                                                                                                                                       | Employment status |              |               | n   | Education        |              |              | n             | Financial strain |              |              | n             |
|                                                                                                                                              | aOR               | CI           |               |     | aOR              | CI           |              |               | aOR              | CI           |              |               |
| Working                                                                                                                                      | 1                 |              |               | 291 | 3+ years         | 1            |              | 290           | Not at all       | 1            |              | 289           |
| Temp. Not working                                                                                                                            | .9201             | .4880        | 1.735         |     | 1-3 years        | 1.087        | .5740        | 2.058         | Few months       | .8994        | .4841        | 1.671         |
| Retired                                                                                                                                      | .6808             | .3420        | 1.356         |     | No postsecondary | 1.166        | .5833        | 2.332         | Half the time+   | 1.749        | .6933        | 4.410         |
| Other                                                                                                                                        | .3815             | .1431        | 1.017         |     | Other            | .6699        | .1969        | 2.279         |                  |              |              |               |
| <b>Knowledge</b>                                                                                                                             |                   |              |               |     |                  |              |              |               |                  |              |              |               |
| Working                                                                                                                                      | 1                 |              |               | 292 | 3+ years         | 1            |              | 291           | Not at all       | 1            |              | 290           |
| Temp. Not working                                                                                                                            | 1.204             | .6390        | 2.268         |     | 1-3 years        | 1.597        | .8309        | 3.070         | Few months       | <b>2.515</b> | <b>1.335</b> | <b>4.739</b>  |
| Retired                                                                                                                                      | .5003             | .2480        | 1.009         |     | No postsecondary | <b>2.263</b> | <b>1.115</b> | <b>4.592</b>  | Half the time+   | 2.372        | .9404        | 5.985         |
| Other                                                                                                                                        | .5004             | .1884        | 1.329         |     | Other            | <b>4.752</b> | <b>1.297</b> | <b>17.412</b> |                  |              |              |               |
| <b>Expense</b>                                                                                                                               |                   |              |               |     |                  |              |              |               |                  |              |              |               |
| Working                                                                                                                                      | 1                 |              |               | 289 | 3+ years         | 1            |              | 288           | Not at all       | 1            |              | 289           |
| Temp. Not working                                                                                                                            | 1.700             | .8911        | 3.323         |     | 1-3 years        | 1.835        | .9324        | 3.612         | Few months       | <b>4.268</b> | <b>2.172</b> | <b>8.385</b>  |
| Retired                                                                                                                                      | 1.537             | .7451        | 3.171         |     | No postsecondary | <b>2.773</b> | <b>1.336</b> | <b>5.757</b>  | Half the time+   | <b>9.623</b> | <b>2.708</b> | <b>34.194</b> |
| Other                                                                                                                                        | .7456             | .2822        | 1.970         |     | Other            | 2.031        | .5762        | 7.156         |                  |              |              |               |
| <b>Experience</b>                                                                                                                            |                   |              |               |     |                  |              |              |               |                  |              |              |               |
| Working                                                                                                                                      | 1                 |              |               | 287 | 3+ years         | 1            |              | 286           | Not at all       | 1            |              | 286           |
| Temp. Not working                                                                                                                            | .9581             | .4820        | 1.905         |     | 1-3 years        | 1.043        | .5392        | 2.019         | Few months       | 1.152        | .5999        | 2.212         |
| Retired                                                                                                                                      | <b>2.143</b>      | <b>1.024</b> | <b>4.485</b>  |     | No postsecondary | .6435        | .3073        | 1.347         | Half the time+   | 2.385        | .9685        | 5.874         |
| Other                                                                                                                                        | 1.531             | .5932        | 3.952         |     | Other            | .7503        | .2024        | 2.781         |                  |              |              |               |
| <b>Transport</b>                                                                                                                             |                   |              |               |     |                  |              |              |               |                  |              |              |               |
| Working                                                                                                                                      | 1                 |              |               | 290 | 3+ years         | 1            |              | 289           | Not at all       | 1            |              | 288           |
| Temp. Not working                                                                                                                            | <b>3.184</b>      | <b>1.463</b> | <b>6.931</b>  |     | 1-3 years        | 1.603        | .6502        | 3.954         | Few months       | 1.746        | .8392        | 3.634         |
| Retired                                                                                                                                      | <b>4.442</b>      | <b>1.900</b> | <b>10.384</b> |     | No postsecondary | <b>2.988</b> | <b>1.187</b> | <b>7.518</b>  | Half the time+   | <b>9.889</b> | <b>3.745</b> | <b>26.113</b> |
| Other                                                                                                                                        | 2.169             | .6948        | 6.773         |     | Other            | 1.019        | .1835        | 5.659         |                  |              |              |               |

Adjusted for: gender; age +/- 60; 95% confidence intervals (CI), significant results are marked in bold

SEP showed no association with any of the barriers or with years of schooling (not shown). Using depression as independent variable, we found that severity of depression (both measured as a categorical variable and a score) was associated with perceived barriers in relation to *Expense* and *Transport*, but not associated with any other perceived barriers (see Supplementary Material Table 3).

## Discussion

### Principal findings

In this study of perceived barriers to accessing mental health care by respondents with present symptoms of depression, we found that expense was a considerable problem for almost 1/3 of the respondents; this perception was more prevalent among individuals without postsecondary education and individuals experiencing financial strain. Transport presented the least difficult barrier in general; but on the other hand, transportation also presented the greatest and most consistent socioeconomic disparity. Transport and expenses associated with mental health care are a problem for disadvantaged individuals.

Stigma was an issue of concern for 22% of the respondents but did not vary significantly according to SEP, whereas lack of knowledge about how to get help was a significantly greater problem for individuals without postsecondary education as compared to individuals with postsecondary education.

Lack of knowledge about how get to help and bad experience were perceived as a problem for 1/5 of the individuals overall as well.

### Strengths and weaknesses of the study

1  
2  
3  
4 A strength of this study was its use of information from a population study from a deprived area in combination  
5 with data on present depression score, information on SEP, and perceived barriers to accessing MHC; by this  
6 design we were able determine the significance of different barriers to access for potential MHC patients in a  
7 deprived area. We are not aware of similar studies.  
8

9  
10 In a recent systematic review of tools measuring help-seeking for mental health problems, Wei, McGrath and  
11 Hayden et al. found no single tool to be preferable over others, but recommended researchers consider tools  
12 according to the population studied. It seemed that the Mental Health Literacy Scale performed best as a help-  
13 seeking measurement tool for mental health, but the authors were reluctant to give general  
14 recommendations<sup>36</sup>. Measuring help-seeking behaviors in mental health is a relative new scholarly field and is  
15 still developing. A limitation in our study was that the items used as dependable variables were not fully  
16 validated; validation would be preferable in order to compare to other studies. The BACE-3, at 30 questions,  
17 was too extensive to use in the LOFUS study, which already consisted of close to 100 questions; this was also  
18 the reasoning behind our focus on five central concepts of barriers to access. The external validity of the  
19 questions is supported by the use of generally accepted and validated concepts of abilities and as such is  
20 comparable to other studies. The content validity was tested by the panel of patients and patients' relatives  
21 and the questions found to be sound, but in retrospect, might not measure the concept of self-efficacy very  
22 well. We used the answer *Not relevant/Do not want to reply* as an indicator that the individual preferred to  
23 handle problems without help. It would have been prudent, however, to ask a more direct question about  
24 perceptions of need for care; it is possible that some individuals did not find the question relevant because  
25 while they experienced mental health issues, they did not perceive a need for further care. We found no  
26 correlation between the answer to the question of relevance and SEP, except for retired respondents, who  
27 tended to state *Not relevant* less, compared to respondents working (not shown).  
28  
29  
30  
31  
32

33  
34 The question about transport was also not clearly separated from the question about perceived barriers in  
35 relation to expenses, as it was not specified whether expenses included transportation-related expenses. Thus,  
36 we have no clear distinction between whether *Transport* as a barrier is primarily a logistical or economical  
37 barrier, or some combination thereof.  
38

### 39 *Comparison with other studies*

40 The total sample contained more respondents in the age group 50 – 69 and fewer in the age groups younger  
41 and older compared to the study population; additionally, the group without any postsecondary education was  
42 under-represented by a factor of 3, compared to the age group 15-64 in the two municipalities studied,  
43 according to general population statistics drawn from Statistics Denmark<sup>25</sup>. For the total sample, questions on  
44 self-rated health (SRH) were rated higher in the sample than the national levels<sup>37</sup> even though long-lasting  
45 illness was more prevalent in the sample (44.7% compared to national rate of 35.6%)<sup>37</sup>; the rate of respondents  
46 with *severely limited physical functioning* was close to the national proportions<sup>38</sup>. The group with symptoms of  
47 depression had scores well below national levels in all health-related variables. The total sample may  
48 overrepresent the middle-aged to older part of the population, an issue seen in national surveys, too<sup>39</sup>.  
49  
50  
51

52 7.3% had symptoms of depression when the summed MDI score was used, which is a considerably higher rate  
53 than found by any other survey in Denmark; however, a recent national survey reported that 7.0% adults suffer  
54  
55  
56  
57  
58  
59  
60

1  
2  
3  
4 from depressed mood, including 7.8% in the Region of Zealand<sup>37</sup>. Eurostat reported a prevalence of 6.3% adults  
5 with depressive symptoms and 3% with major depression symptoms in Denmark<sup>40</sup>. In the present study, 225  
6 respondents reported both a core symptom of depression *Most of the time* or more and a summed MDI score  
7 >20, equivalent to a MDD prevalence of 4.4%. A comparable study by Ellervik et al. found 2.5% with a summed  
8 MDI score >25; we found 3.8%<sup>41</sup>. The present data is a subsample from a population survey in a deprived area,  
9 which could explain the high rate of depression symptoms found.  
10  
11

12  
13 We found perceived stigma to be of *Quite a lot* or *A lot of concern* for 20% of the respondents. This  
14 corresponds with findings in a systematic review, where overall 20 – 25% respondents in 44 studies reported  
15 stigma as a barrier to accessing mental health services<sup>42</sup>. Stigma showed no association to SEP in our data. We  
16 have not been able to verify this in other studies except for one Canadian study, which likewise found no  
17 association between years of education and experiencing stigma in mental health care. However, they did find  
18 perceived stigma more prevalent among respondents not working<sup>43</sup>. In the Panel of Relatives and Patients of  
19 Psychiatry Services of Region Zealand, it was said that patients with mental disorders, and their relatives, pull  
20 the curtains together when they meet with each other privately, and that patients are indeed concerned with  
21 what others might think.  
22  
23

24  
25 One in five experienced *Knowledge* as a barrier and had doubts about what to do to get professional help. With  
26 free access to a GP in Denmark, and the GP universally understood to be the gatekeeper for referrals, this is  
27 puzzling. Among respondents with symptoms of depression, 138 reported former or present depression, and  
28 35 of them (25%) still answered that they experienced *Knowledge* to be a barrier *Quite a lot* or *A lot* of the  
29 time. Of those with symptoms of depression and presently taking antidepressant medication, 8 (12%) had  
30 doubts about what to do to get help. This could be due to the nature of the disease, but we did not find  
31 support for this, as we found no association to *Knowledge* with the severity of symptoms of depression.  
32 However, a Canadian study on perceived unmet need by respondents with symptoms of anxiety or depression  
33 found high symptom scores were associated with a higher degree of unmet need<sup>7</sup>, and not knowing how or  
34 where to get help was the most reported reason. The Panel of Relatives and Patients of Psychiatry Services of  
35 Region Zealand was not very surprised by this finding: despite free access to a GP, one individual reported that  
36 he could not get a family-GP, but had to meet changing doctors in a regional clinic (due to lack of GP's in the  
37 area). Another mentioned the waiting time for an appointment with the GP could be weeks (due to lack of  
38 GP's).  
39  
40  
41  
42  
43

44 It could be argued that older people may be more reluctant to use MHC and feel more stigmatized by the need  
45 for psychotherapy<sup>44 45</sup>. We did not find support for this, as the retired group did not differ in perception of  
46 stigma from employed persons. Likewise, older retired persons might be less willing to pay for the expenses  
47 associated with treatment, but we did not find support for this either, as expense was not a significant barrier  
48 for the group retired compared to the group working.  
49  
50

51 The expenses associated with mental health care were a common problem and concern of almost 1/3 of our  
52 respondents, and by two- to five-fold more by respondents without postsecondary education or in financial  
53 strain. Use of mental health care is sensitive to cost<sup>46</sup>, and especially so for persons in low SEP<sup>47</sup>. A German  
54  
55  
56  
57  
58  
59

1  
2  
3  
4 study found that even with free access to a psychologist these services are used less by people in low SEP<sup>19</sup>,  
5 which could be explained in part by our findings; people without postsecondary education may have less  
6 knowledge of how to access professional MHC, thus leading to lower usage of available services.  
7

8  
9 Experience with former mental health care treatment made retired respondents more reluctant to seek MHC  
10 as compared to the working population. This may not necessarily be due to bad experiences with health care  
11 professionals, though stigmatization can be a problem in health services too<sup>48</sup>; reports of past experience as a  
12 barrier could also indicate bad experience with side effects from a medication. Our study was not designed to  
13 capture or explore this nuance. Retired individuals are more likely to have more experience with health care,  
14 and this group includes people receiving early retirement pensions, which could indicate a chronic illness  
15 leading to early retirement and thus more opportunities for more bad experiences. The patient panel  
16 questioned the respondents' experience with MHC, since the rates of bad past experiences were so low; one  
17 remarking: "Those who are really feeling bad have not participated in this survey". For the panel, bad  
18 experience was a common deterrent to MHC, which may indicate an important area of future study.  
19  
20  
21

22  
23 Transport was perceived to be a greater problem by persons in low SEP compared to individuals in high SEP.  
24 This aligns well with our previous findings of the impact of distance and SEP on MHC use by patients in  
25 antidepressant treatment<sup>21</sup>. However, the question was not well distinguished from the question on expenses.  
26 Difficulty with transport or travelling includes the time spent to reach services and coordinate with other  
27 obligations – taking care of family duties or take time off at work, etc. Reliance on infrequent or inadequate  
28 public transportation could also be a reason to answer positively to this question, but the study was not  
29 designed to capture information regarding public versus private transportation, e.g. The patient panel was  
30 surprised that transport was a minor issue for the respondents, since it was viewed by them to be both time-  
31 consuming and expensive.  
32  
33

#### 34 35 *Meaning of the study and possible explanations and implication for policymakers*

36 The study aimed to evaluate why mental health services were used less in a deprived area of Denmark and if  
37 this was due to perceived barriers for the patients and furthermore was correlated to SEP. The answer is quite  
38 clear: lack of postsecondary education was linked to greater perceived barriers to mental health care and  
39 expenses are a barrier to mental health care for those with no postsecondary education and in financial strain.  
40 Low mental health literacy, defined as knowledge and beliefs about mental disorders which aid in their  
41 recognition, management and prevention<sup>49</sup>, could be a part of the explanation, since low mental health literacy  
42 is also associated with low SEP<sup>50</sup>. Thus, empowering the community to take action for better mental health  
43 literacy<sup>51</sup> can lead to increased help-seeking by individuals in low SEP. In Denmark, two programs on improving  
44 mental health literacy exist: Mental Health First Aid<sup>52</sup> and the ABC mental health initiative<sup>53</sup>, both adopted from  
45 Australia. An approach directed more specifically toward deprived areas within such programs might improve  
46 SEP equity in mental health care treatment.  
47  
48  
49  
50

51 Addressing barriers and easing access for the deprived is obviously necessary. Lack of postsecondary education  
52 is associated with greater prevalence of perception of barriers to mental health care, in addition to an  
53 increased prevalence of mood disorders. Clearly, our results showed that *Expense* is a barrier for people in low  
54  
55  
56  
57  
58  
59  
60

1  
2  
3  
4 SEP, but as found in the German study<sup>19</sup>, people in low SEP use psychologists less frequently even with free  
5 access. Psychotherapy is associated with the ability to engage, which in itself could be more difficult if an  
6 individual struggles with social and economic problems on top of mental ones. In order to address these  
7 related barriers, the deprived and depressed probably have additional needs beyond medication and  
8 psychotherapy, such as social supports and social/domestic/workplace intervention.  
9  
10

11 In a future study it could be interesting to investigate the association between depression score, perceived  
12 barriers and use of MHC for a period after the score. Future research could also investigate which experiences  
13 cause retired respondents with symptoms of depression to hesitate to access mental health care. Further  
14 improvements and validation of a short form questionnaire as the present could be beneficial.  
15  
16  
17

### 18 **Author contributions**

19 AP conceived the research and developed and validated the questions on barriers supervised by AH. AP wrote  
20 the first draft of the manuscript assisted by LHH. AH, ES, and FBW contributed to the data analysis,  
21 interpretation of results and critical revision of the manuscript.  
22  
23  
24  
25

### 26 **Acknowledgement**

27 With acknowledgement to the Panel of Relatives and Patients of Psychiatry Services of Region Zealand for  
28 contributing to validate the questions on perceived barriers and commenting on the outcomes, with special  
29 gratitude to Anja Bang. We thank LOFUS for providing the data and Randi Jepsen for kind support. We also  
30 thank the Health Research Foundation of Region Zealand for financial support and particularly former head  
31 nurse Tove Kjærbo for initiating the study.  
32  
33

34 Data sharing: No additional data available  
35  
36  
37  
38  
39  
40  
41  
42  
43  
44  
45  
46  
47  
48  
49  
50  
51  
52  
53  
54  
55  
56  
57  
58  
59  
60



## References

1. Global, regional, and national incidence, prevalence, and years lived with disability for 328 diseases and injuries for 195 countries, 1990-2016: a systematic analysis for the Global Burden of Disease Study 2016. *Lancet* 2017;390(10100):1211-59. doi: 10.1016/s0140-6736(17)32154-2 [published Online First: 2017/09/19]
2. Elovainio M, Pulkki-Raback L, Jokela M, et al. Socioeconomic status and the development of depressive symptoms from childhood to adulthood: a longitudinal analysis across 27 years of follow-up in the Young Finns study. *Soc Sci Med* 2012;74(6):923-29. doi: S0277-9536(12)00021-4 [pii];10.1016/j.socscimed.2011.12.017 [doi]
3. Asselmann E, Wittchen HU, Lieb R, et al. Sociodemographic, clinical, and functional long-term outcomes in adolescents and young adults with mental disorders. *Acta Psychiatr Scand* 2018;137(1):6-17. doi: 10.1111/acps.12792 [published Online First: 2017/09/02]
4. Thielen K, Nygaard E, Andersen I, et al. Employment consequences of depressive symptoms and work demands individually and combined. *Eur J Public Health* 2014;24(1):34 - 39.
5. Laursen TM, Musliner KL, Benros ME, et al. Mortality and life expectancy in persons with severe unipolar depression. *J Affect Disord* 2016;193:203-7. doi: 10.1016/j.jad.2015.12.067. Epub;2016 Jan 6.:203-07.
6. Roness A, Mykletun A, Dahl AA. Help-seeking behaviour in patients with anxiety disorder and depression. *Acta Psychiatr Scand* 2005;111(1):51-58.
7. Dezetter A, Duhoux A, Menear M, et al. Reasons and Determinants for Perceiving Unmet Needs for Mental Health in Primary Care in Quebec. *Can J Psychiatry* 2015;60(6):284-93.
8. Thornicroft G, Chatterji S, Evans-Lacko S, et al. Undertreatment of people with major depressive disorder in 21 countries. *Br J Psychiatry* 2017;210(2):119-24.
9. Lorant V, Deliege D, Eaton W, et al. Socioeconomic inequalities in depression: a meta-analysis. *Am J Epidemiol* 2003;157(2):98-112.
10. Barbaglia MG, M. tH, Dorsselaer S, et al. Negative socioeconomic changes and mental disorders: a longitudinal study. *J Epidemiol Community Health* 2015;69(1):55-62.
11. Dijkstra-Kersten SM, Biesheuvel-Leliefeld KE, van der Wouden JC, et al. Associations of financial strain and income with depressive and anxiety disorders. *J Epidemiol Community Health* 2015;jech-205088.
12. Ahnquist J, Wamala SP. Economic hardships in adulthood and mental health in Sweden. The Swedish National Public Health Survey 2009. *BMC Public Health* 2011;11:788. doi: 10.1186/1471-2458-11-788.:788-11.
13. van Krugten FC, Kaddouri M, Goorden M, et al. Indicators of patients with major depressive disorder in need of highly specialized care: A systematic review. *PloS one* 2017;12(2):e0171659. doi: 10.1371/journal.pone.0171659 [published Online First: 2017/02/09]
14. Glozier N, Davenport T, Hickie IB. Identification and management of depression in Australian primary care and access to specialist mental health care. *Psychiatr Serv* 2012;63(12):1247-51. doi: 1392910 [pii];10.1176/appi.ps.201200017 [doi]
15. Dey M, Jorm AF. Social determinants of mental health service utilization in Switzerland. *Int J Public Health* 2017;62(1):85-93.
16. Boerema AM, Ten Have M, Kleiboer A, et al. Demographic and need factors of early, delayed and no mental health care use in major depression: a prospective study. *BMC psychiatry* 2017;17(1):367. doi: 10.1186/s12888-017-1531-8 [published Online First: 2017/11/18]
17. Vasiliadis HM, Tempier R, Lesage A, et al. General practice and mental health care: determinants of outpatient service use. *Can J Psychiatry* 2009;54(7):468-76.

18. Hansen AH, Høye A. Gender differences in the use of psychiatric outpatient specialist services in Tromsø, Norway are dependent on age: a population-based cross-sectional survey. *BMC Health Serv Res* 2015;15:. doi:10.1186/s12913-015-1146-z.:doi-1146.
19. Epping J, Muschik D, Geyer S. Social inequalities in the utilization of outpatient psychotherapy: analyses of registry data from German statutory health insurance. *Int J Equity Health* 2017;16(1):147-0644.
20. Evans-Lacko S, Aguilar-Gaxiola S, Al-Hamzawi A, et al. Socio-economic variations in the mental health treatment gap for people with anxiety, mood, and substance use disorders: results from the WHO World Mental Health (WMH) surveys. *Psychol Med* 2017:1-12. doi: 10.1017/s0033291717003336 [published Online First: 2017/11/28]
21. Packness A, Waldorff FB, Christensen RD, et al. Impact of socioeconomic position and distance on mental health care utilization: a nationwide Danish follow-up study. *Soc Psychiatry Psychiatr Epidemiol* 2017:10-1437. doi: doi: 10.1007/s00127-017-1437-2
22. Pedersen KM, Andersen JS, Sondergaard J. General practice and primary health care in Denmark. *J Am Board Fam Med* 2012;25 Suppl 1:S34-8. doi: 10.3122/jabfm.2012.02.110216.:S34-S38.
23. Larsen A. Psykologbehandling: [www.sundhed.dk](http://www.sundhed.dk); 2014 [updated 9/29/2014. Available from: [www.sundhed.dk/borger/sygdomme-a-aa/sociale-ydelser/sociale-ydelser/behandling/psykologbehandling/](http://www.sundhed.dk/borger/sygdomme-a-aa/sociale-ydelser/sociale-ydelser/behandling/psykologbehandling/).
24. Ministry of Economics- and Interior. Key figures of municipalities [Public Database]. Økonomi- og Indenrigsministeriet; [Available from: [www.noegletal.dk](http://www.noegletal.dk) accessed 20/02/ 2018.
25. Statistics Denmark. StatBank Denmark [Public Database]. Statistics Denmark; [Available from: [www.statistikbanken.dk](http://www.statistikbanken.dk) accessed 11/11 2015.
26. Pedersen CB. The Danish Civil Registration System. *Scand J Public Health* 2011;39(7 Suppl):22-25.
27. Jepsen R, Lindström Engholm C, Brodersen J, et al. Lolland-Falster Health Study: study protocol for a household-based prospective cohort study. *International Journal of Epidemiology* 2018;In review
28. Olsen LR, Jensen DV, Noerholm V, et al. The internal and external validity of the Major Depression Inventory in measuring severity of depressive states. *Psychol Med* 2003;33(2):351-56.
29. World Health Organization. The ICD-10 Classification of Mental and Behavioural Disorders 1989.
30. Bech P, Timmerby N, Martiny K, et al. Psychometric evaluation of the Major Depression Inventory (MDI) as depression severity scale using the LEAD (Longitudinal Expert Assessment of All Data) as index of validity. *BMC Psychiatry* 2015;15:190. doi: 10.1186/s12888-015-0529-3.:190-0529.
31. Bech P. Clinical Psychometrics. First ed. Oxford: John Wiley & Sons, Ltd. 2012:153-53.
32. European Union. European Health Interview Survey (EHIS wave 2). Methodological manual. Methodologies and Working papers ed. Luxembourg: Eurostat 2013:1-202.
33. Clement S, Brohan E, Jeffery D, et al. Development and psychometric properties the Barriers to Access to Care Evaluation scale (BACE) related to people with mental ill health. *BMC Psychiatry* 2012;12:36. doi: 1471-244X-12-36 [pii];10.1186/1471-244X-12-36 [doi]
34. Levesque JF, Harris MF, Russell G. Patient-centred access to health care: conceptualising access at the interface of health systems and populations. *Int J Equity Health* 2013;12:18. doi: 10.1186/1475-9276-12-18.:18-12.
35. Stata Statistical Software: Release 15. [program]. 1 version: College Station,TX:StataCorp LP., 2017.
36. Wei Y, McGrath PJ, Hayden J, et al. Measurement properties of mental health literacy tools measuring help-seeking: a systematic review. *J Ment Health* 2017:1-13.
37. Sundhedsstyrelsen NBoH. [Health of the Danes - The National Health Profile]. In: Jensen HD, M; Ekholm, O; Christensen AI, ed. København, 2018:1-134.
38. Johnsen NFD, M.; Michelsen S.I.; Juel K. [Health profile of adults with impaired or reduced physical functioning]. In: Folkesundhed Sif, ed. København: Syddansk Universitet, 2014:1-134.

- 1  
2  
3  
4 39. National Board of Health. [Mental Health of Adult Danes]. København: Sundhedsstyrelsen 2010.
- 5 40. European Union. Eurostat Luxembourg: European Commission; [Available from:  
6 <http://ec.europa.eu/eurostat/web/health/health-status-determinants/data/database> accessed 04/02  
7 2018.
- 8 41. Ellervik C, Kvetny J, Christensen KS, et al. Prevalence of depression, quality of life and antidepressant  
9 treatment in the Danish General Suburban Population Study. *Nord J Psychiatry* 2014 doi:  
10 10.3109/08039488.2013.877074 [doi]
- 11 42. Clement S, Schauman O, Graham T, et al. What is the impact of mental health-related stigma on help-  
12 seeking? A systematic review of quantitative and qualitative studies. *Psychol Med* 2015;45(1):11-27.
- 13 43. Patten SB, Williams JV, Lavorato DH, et al. Perceived Stigma among Recipients of Mental Health Care in the  
14 General Canadian Population. *Canadian journal of psychiatry Revue canadienne de psychiatrie*  
15 2016;61(8):480-8. doi: 10.1177/0706743716639928 [published Online First: 2016/06/17]
- 16 44. Conner KO, Copeland VC, Grote NK, et al. Mental health treatment seeking among older adults with  
17 depression: the impact of stigma and race. *The American journal of geriatric psychiatry : official journal*  
18 *of the American Association for Geriatric Psychiatry* 2010;18(6):531-43. doi:  
19 10.1097/JGP.0b013e3181cc0366 [published Online First: 2010/03/12]
- 20 45. ten Have M, de Graaf R, Ormel J, et al. Are attitudes towards mental health help-seeking associated with  
21 service use? Results from the European Study of Epidemiology of Mental Disorders. *Soc Psychiatry*  
22 *Psychiatr Epidemiol* 2010;45(2):153-63.
- 23 46. Sevilla-Dedieu C, Kovess-Masfety V, Gilbert F, et al. Mental health care and out-of-pocket expenditures in  
24 Europe: results from the ESEMeD project. *J Ment Health Policy Econ* 2011;14(2):95-105.
- 25 47. Kiil A, Houlberg K. How does copayment for health care services affect demand, health and redistribution?  
26 A systematic review of the empirical evidence from 1990 to 2011. *Eur J Health Econ* 2014;15(8):813-28.
- 27 48. Mood Disorders Society of Canada. Stigma and discrimination - as expressed by mental health  
28 professionals, 2007.
- 29 49. Jorm AF, Korten AE, Jacomb PA, et al. "Mental health literacy": a survey of the public's ability to recognise  
30 mental disorders and their beliefs about the effectiveness of treatment. *The Medical journal of*  
31 *Australia* 1997;166(4):182-6. [published Online First: 1997/02/17]
- 32 50. Dunn KI, Goldney RD, Grande ED, et al. Quantification and examination of depression-related mental health  
33 literacy. *Journal of evaluation in clinical practice* 2009;15(4):650-3. doi: 10.1111/j.1365-  
34 2753.2008.01067.x [published Online First: 2009/06/16]
- 35 51. Jorm AF. Mental health literacy: empowering the community to take action for better mental health. *The*  
36 *American psychologist* 2012;67(3):231-43. doi: 10.1037/a0025957 [published Online First: 2011/11/02]
- 37 52. Jensen KB, Morthorst BR, Vendsborg PB, et al. Effectiveness of Mental Health First Aid training in Denmark:  
38 a randomized trial in waitlist design. *Soc Psychiatry Psychiatr Epidemiol* 2016;51(4):597-606. doi:  
39 10.1007/s00127-016-1176-9 [published Online First: 2016/02/04]
- 40 53. Koushede V. Act-Belong-Comit: National Institute of Public Health; 2018 [Available from: <http://www.sifolkesundhed.dk/Forskning/Befolkningens%20sundhedstilstand/Mental%20sundhed/ABC%20for%20mental%20sundhed.aspx?lang=en> accessed 04.04 2018.
- 41  
42  
43  
44  
45  
46  
47  
48  
49  
50  
51  
52  
53  
54  
55  
56  
57  
58  
59  
60

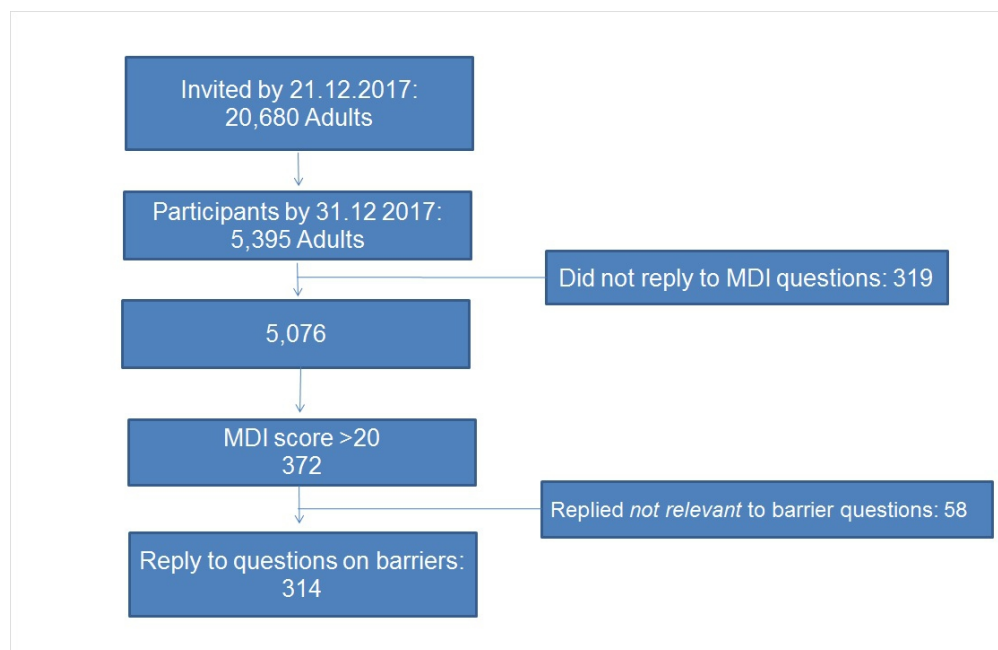

Figure 1: Flow chart of sampling from Lolland-Falster Health Study

295x190mm (96 x 96 DPI)

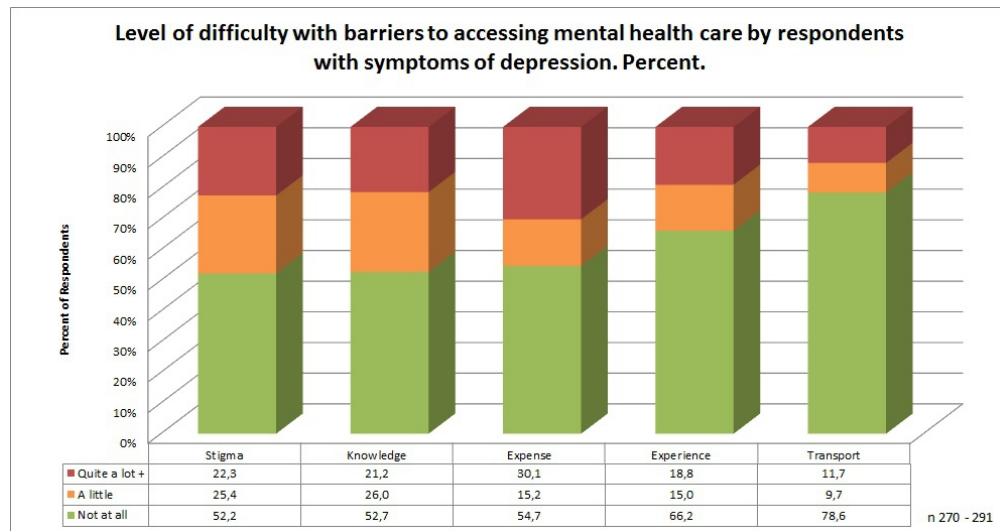

Figure 2. Responses on perceived barriers to accessing mental health care, proportions

262x138mm (96 x 96 DPI)

Socioeconomic position and perceived barriers to accessing mental health care by individuals with symptoms of depression:  
Results from the Lolland-Falster Health Study.

## Supplementary

### *Conceptual frame*

Patients' choice of care will relate to personal preferences and abilities to access care. In a comprehensive theoretical approach by Levesque et al\* they combine several theories on access to health care and final treatment outcome. The model is patient-centered and based on service demand and service supply between which they describe the stepwise fulfilment of needs in the process from recognizing a health care need to a finalized treatment. The model has five central concepts associated with enforcing or inhibiting access on the supply-side, and five corresponding abilities on the demand-side, likewise with associated enforcing or inhibiting factors.

Supplementary Figure 1: Model of a conceptual framework of access to health care\*

Insert supp fig 1 here

\* Levesque JF, Harris MF, Russell G. Patient-centred access to health care: conceptualising access at the interface of health systems and populations. *Int J Equity Health* 2013;12:18. doi: 10.1186/1475-9276-12-18.:18-12.

Supplementary table 1. The BACE-questions and derived condensated questions on barriers

Indsert pdf-table

Socioeconomic position and perceived barriers to accessing mental health care by individuals with symptoms of depression: Results from the Lolland-Falster Health Study.

Supplementary table 2 Perceived barriers accessing MHC & symptoms of depression in crude numbers

| Suppl. Table 2: Perceived barriers accessing MHC & symptoms of depression, crude numbers |             |             |               |            |                   |  |
|------------------------------------------------------------------------------------------|-------------|-------------|---------------|------------|-------------------|--|
| <b>Stigma</b>                                                                            | <b>Mild</b> | <b>Mod.</b> | <b>Severe</b> | <b>Sum</b> | <b>Pct (resp)</b> |  |
| Not at all                                                                               | 73          | 50          | 29            | 152        | 52,2              |  |
| A little                                                                                 | 39          | 20          | 15            | 74         | 25,4              |  |
| Quite a lot                                                                              | 16          | 13          | 10            | 39         | 13,4              |  |
| A lot                                                                                    | 10          | 6           | 10            | 26         | 8,9               |  |
| NA                                                                                       | 11          | 6           | 6             | 23         |                   |  |
| Sum                                                                                      | 149         | 95          | 70            | 314        | 291               |  |
| <b>Knowledge</b>                                                                         | <b>Mild</b> | <b>Mod.</b> | <b>Severe</b> | <b>Sum</b> | <b>Pct (resp)</b> |  |
| Not at all                                                                               | 77          | 50          | 27            | 154        | 52,7              |  |
| A little                                                                                 | 41          | 21          | 14            | 76         | 26,0              |  |
| Quite a lot                                                                              | 20          | 13          | 16            | 49         | 16,8              |  |
| A lot                                                                                    | 2           | 4           | 7             | 13         | 4,5               |  |
| NA                                                                                       | 9           | 7           | 6             | 22         |                   |  |
| Sum                                                                                      | 149         | 95          | 70            | 314        | 292               |  |
| <b>Expense</b>                                                                           | <b>Mild</b> | <b>Mod.</b> | <b>Severe</b> | <b>Sum</b> | <b>Pct (resp)</b> |  |
| Not at all                                                                               | 84          | 47          | 27            | 158        | 54,7              |  |
| A little                                                                                 | 20          | 14          | 10            | 44         | 15,2              |  |
| Quite a lot                                                                              | 15          | 14          | 15            | 44         | 15,2              |  |
| A lot                                                                                    | 18          | 13          | 12            | 43         | 14,9              |  |
| NA                                                                                       | 12          | 7           | 6             | 25         |                   |  |
| Sum                                                                                      | 149         | 95          | 70            | 314        | 289               |  |
| <b>Experience</b>                                                                        | <b>Mild</b> | <b>Mod.</b> | <b>Severe</b> | <b>Sum</b> | <b>Pct (resp)</b> |  |
| Not at all                                                                               | 98          | 58          | 34            | 190        | 66,2              |  |
| A little                                                                                 | 22          | 11          | 10            | 43         | 15,0              |  |
| Quite a lot                                                                              | 15          | 9           | 8             | 32         | 11,1              |  |
| A lot                                                                                    | 4           | 10          | 8             | 22         | 7,7               |  |
| NA                                                                                       | 10          | 7           | 10            | 27         |                   |  |
| Sum                                                                                      | 149         | 95          | 70            | 314        | 287               |  |
| <b>Transport</b>                                                                         | <b>Mild</b> | <b>Mod.</b> | <b>Severe</b> | <b>Sum</b> | <b>Pct (resp)</b> |  |
| Not at all                                                                               | 117         | 66          | 45            | 228        | 78,6              |  |
| A little                                                                                 | 10          | 11          | 7             | 28         | 9,7               |  |
| Quite a lot                                                                              | 6           | 4           | 9             | 19         | 6,6               |  |
| A lot                                                                                    | 6           | 6           | 3             | 15         | 5,2               |  |
| NA                                                                                       | 10          | 8           | 6             | 24         |                   |  |
| Sum                                                                                      | 149         | 95          | 70            | 314        | 290               |  |

Supplementary table 3: Odds ratios for 5 perceived barriers accessing MHC by severity of symptoms of depression.

| Suppl. Table 3. Adjusted odds ratios for five perceived barriers accessing mental health care by severity of symptoms of depression |        |       |       |     |           |       |        |     |              |              |              |     |            |       |       |     |              |              |              |     |
|-------------------------------------------------------------------------------------------------------------------------------------|--------|-------|-------|-----|-----------|-------|--------|-----|--------------|--------------|--------------|-----|------------|-------|-------|-----|--------------|--------------|--------------|-----|
| Dep. Grade                                                                                                                          | Stigma |       |       | n   | Knowledge |       |        | n   | Expense      |              |              | n   | Experience |       |       | n   | Transport    |              |              | n   |
|                                                                                                                                     | aOR    | CI    |       |     | aOR       | CI    |        |     | aOR          | CI           |              |     | aOR        | CI    |       |     | aOR          | CI           |              |     |
| Mild                                                                                                                                | 1      |       |       | 291 | 1         |       |        | 292 | 1            |              |              | 289 | 1          |       |       | 287 | 1            |              |              | 290 |
| Moderate                                                                                                                            | .8463  | .4903 | 1.461 |     | .9464     | .5510 | 16.256 |     | 1.350        | .7722        | 2.359        |     | 1.220      | .6854 | 2.172 |     | 1.684        | .8614        | 3.294        |     |
| Severe                                                                                                                              | 1.259  | .6867 | 2.309 |     | 1.723     | .9420 | 3.151  |     | <b>2.043</b> | <b>1.097</b> | <b>3.804</b> |     | 1.739      | .9220 | 3.279 |     | <b>2.225</b> | <b>1.098</b> | <b>4.512</b> |     |
| MDI score#                                                                                                                          | 1.005  | .9628 | 1.050 |     | 1.030     | .9864 | 10.750 |     | <b>1.063</b> | <b>1.016</b> | <b>1.112</b> |     | 1.035      | .9891 | 1.083 |     | <b>1.076</b> | <b>1.024</b> | <b>1.130</b> |     |

Adjusted for: gender; age +/- 60; 95% confidence intervals (CI), marked bold  
# Major Depression Inventory scale > 20 ≤ 50, ungrouped

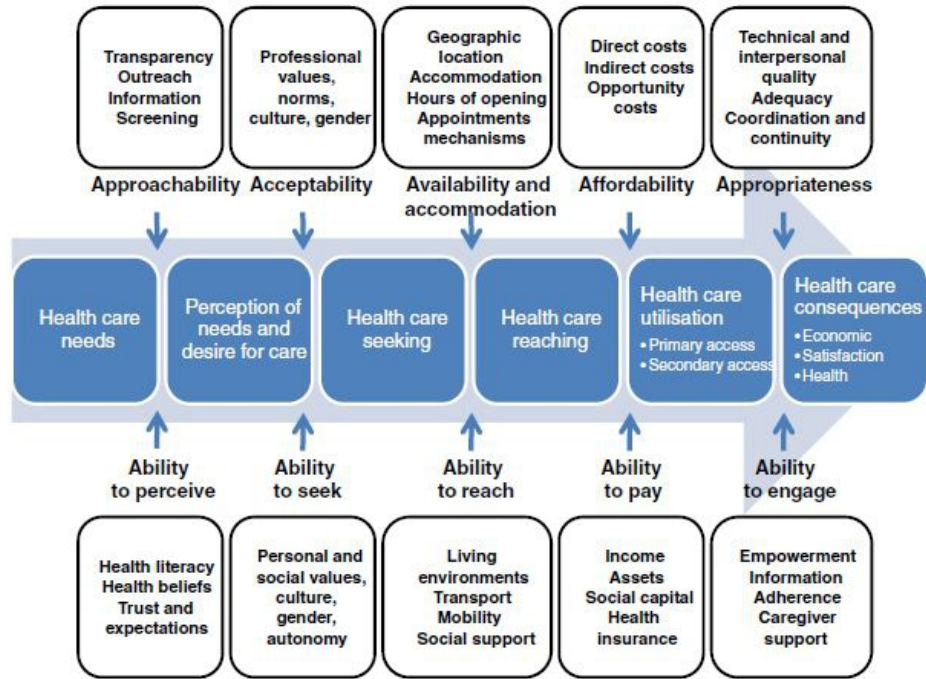

Supplementary Figure 1: Model of a conceptual framework of access to health care

172x119mm (96 x 96 DPI)



**Supplementary table: Condensation of the *Barriers to Access to Care Evaluation scale (BACE v3)***

| Q no | BACE v3 Question                                                                                                           | Abilities# | Covered by question $\alpha$ |
|------|----------------------------------------------------------------------------------------------------------------------------|------------|------------------------------|
| 1    | Being unsure where to go to get professional care                                                                          | Perceive   | 1                            |
| 2.   | Wanting to solve the problem on my own                                                                                     | Perceive   | (6)                          |
| 3.   | Concern that I might be seen as weak for having a mental health problem                                                    | Seek       | 2                            |
| 4.   | Fear of being put in hospital against my will                                                                              | Seek       | 2                            |
| 5.   | Concern that it might harm my chances when applying for jobs                                                               | Seek       | 2                            |
| 6.   | Problems with transport or travelling to appointments                                                                      | Reach      | 3                            |
| 7.   | Thinking the problem would get better by itself                                                                            | Perceive   |                              |
| 8.   | Concern about what my family might think or say                                                                            | Seek       | 2                            |
| 9.   | Feeling embarrassed or ashamed                                                                                             | Seek       | 2                            |
| 10.  | Preferring to get alternative forms of care (e.g. spiritual care, non-Western healing / medicine, complementary therapies) | Perceive   |                              |
| 11.  | Not being able to afford the financial costs involved                                                                      | Pay        | 4                            |
| 12.  | Concern that I might be seen as 'crazy'                                                                                    | Seek       | 2                            |
| 13.  | Thinking that professional care probably would not help                                                                    |            | (6)                          |
| 14.  | Concern that I might be seen as a bad parent                                                                               | Seek       | 2                            |
| 15.  | Professionals from my own ethnic or cultural group not being available                                                     |            |                              |
| 16.  | Being too unwell to ask for help                                                                                           |            |                              |
| 17.  | Concern that people I know might find out                                                                                  | Seek       | 2                            |
| 18.  | Dislike of talking about my feelings, emotions or thoughts                                                                 | Seek       |                              |
| 19.  | Concern that people might not take me seriously if they found out I was having professional care                           | Seek       | 2                            |
| 20.  | Concerns about the treatments available (e.g. medication side effects)                                                     | Perceive   |                              |
| 21.  | Not wanting a mental health problem to be on my medical records                                                            | Seek       | 2                            |
| 22.  | Having had previous bad experiences with professional care for mental health                                               | Engage     | 5                            |
| 23.  | Preferring to get help from family or friends                                                                              | Seek       |                              |
| 24.  | Concern that my children may be taken into care or that I may lose access or custody without my agreement                  | Seek       | 2                            |
| 25.  | Thinking I did not have a problem                                                                                          | Perceive   | 6                            |
| 26.  | Concern about what my friends might think or say                                                                           | Seek       | 2                            |
| 27.  | Difficulty taking time off work                                                                                            | Reach      |                              |
| 28.  | Concern about what people at work might think, say or do                                                                   | Seek       | 2                            |
| 29.  | Having problems with childcare while I receive professional care                                                           | Reach      | 3                            |
| 30.  | Having no one who could help me get professional care                                                                      | Reach      |                              |

Clement et al. *BMC Psychiatry* 2012, 12:36

*Development and psychometric properties the Development and psychometric properties the Barriers to Access to Care Evaluation scale (BACE) - related to people with mental ill health*

# According to model of Levesque et al. *International Journal for Equity in Health* 2013, 12:18

Patient-centred access to health care: conceptualising access at the interface of health systems and populations

$\alpha$  The questions in the questionnaire of the present study

STROBE Statement for the study: **Socioeconomic position and perceived barriers to access mental health care by individuals with symptoms of depression. Results from the Lolland-Falster Health Study.**

|                              | Item No | Recommendation                                                                                                                                                                                    | Addressed on page:                     |
|------------------------------|---------|---------------------------------------------------------------------------------------------------------------------------------------------------------------------------------------------------|----------------------------------------|
| <b>Title and abstract</b>    | 1       | (a) Indicate the study's design with a commonly used term in the title or the abstract                                                                                                            | 4                                      |
|                              |         | (b) Provide in the abstract an informative and balanced summary of what was done and what was found                                                                                               | 2                                      |
| <b>Introduction</b>          |         |                                                                                                                                                                                                   |                                        |
| Background/rationale         | 2       | Explain the scientific background and rationale for the investigation being reported                                                                                                              | 3                                      |
| Objectives                   | 3       | State specific objectives, including any prespecified hypotheses                                                                                                                                  | 4                                      |
| <b>Methods</b>               |         |                                                                                                                                                                                                   |                                        |
| Study design                 | 4       | Present key elements of study design early in the paper                                                                                                                                           | 4                                      |
| Setting                      | 5       | Describe the setting, locations, and relevant dates, including periods of recruitment, exposure, follow-up, and data collection                                                                   | 5                                      |
| Participants                 | 6       | (a) Give the eligibility criteria, and the sources and methods of selection of participants. Describe methods of follow-up                                                                        | 5                                      |
|                              |         | (b) For matched studies, give matching criteria and number of exposed and unexposed                                                                                                               |                                        |
| Variables                    | 7       | Clearly define all outcomes, exposures, predictors, potential confounders, and effect modifiers. Give diagnostic criteria, if applicable                                                          | 5 - 6<br>Table 1                       |
| Data sources/<br>measurement | 8*      | For each variable of interest, give sources of data and details of methods of assessment (measurement). Describe comparability of assessment methods if there is more than one group              | 5 - 6<br><i>Supplement<br/>Table 1</i> |
| Bias                         | 9       | Describe any efforts to address potential sources of bias                                                                                                                                         |                                        |
| Study size                   | 10      | Explain how the study size was arrived at                                                                                                                                                         | 7 & Figure 1                           |
| Quantitative variables       | 11      | Explain how quantitative variables were handled in the analyses. If applicable, describe which groupings were chosen and why                                                                      | 5 - 6                                  |
| Statistical methods          | 12      | (a) Describe all statistical methods, including those used to control for confounding                                                                                                             | 7                                      |
|                              |         | (b) Describe any methods used to examine subgroups and interactions                                                                                                                               |                                        |
|                              |         | (c) Explain how missing data were addressed                                                                                                                                                       |                                        |
|                              |         | (d) If applicable, explain how loss to follow-up was addressed                                                                                                                                    |                                        |
|                              |         | (e) Describe any sensitivity analyses                                                                                                                                                             |                                        |
| <b>Results</b>               |         |                                                                                                                                                                                                   |                                        |
| Participants                 | 13*     | (a) Report numbers of individuals at each stage of study—eg numbers potentially eligible, examined for eligibility, confirmed eligible, included in the study, completing follow-up, and analysed | 7                                      |
|                              |         | (b) Give reasons for non-participation at each stage                                                                                                                                              |                                        |
|                              |         | (c) Consider use of a flow diagram                                                                                                                                                                | Figure 1                               |
| Descriptive data             | 14*     | (a) Give characteristics of study participants (eg demographic, clinical, social) and information on exposures and potential confounders                                                          | Table 1                                |
|                              |         | (b) Indicate number of participants with missing data for each variable of interest                                                                                                               | Supplement<br>table 2                  |
|                              |         | (c) Summarise follow-up time (eg, average and total amount)                                                                                                                                       |                                        |
| Outcome data                 | 15*     | Report numbers of outcome events or summary measures over time                                                                                                                                    |                                        |

|    |                          |    |                                                                                                                                                                                                              |                        |
|----|--------------------------|----|--------------------------------------------------------------------------------------------------------------------------------------------------------------------------------------------------------------|------------------------|
| 1  | Main results             | 16 | (a) Give unadjusted estimates and, if applicable, confounder-adjusted estimates and their precision (eg, 95% confidence interval). Make clear which confounders were adjusted for and why they were included | Table 3<br>Table 4 + 5 |
| 2  |                          |    | (b) Report category boundaries when continuous variables were categorized                                                                                                                                    | 5                      |
| 3  |                          |    | (c) If relevant, consider translating estimates of relative risk into absolute risk for a meaningful time period                                                                                             |                        |
| 4  | Other analyses           | 17 | Report other analyses done—eg analyses of subgroups and interactions, and sensitivity analyses                                                                                                               |                        |
| 5  | <b>Discussion</b>        |    |                                                                                                                                                                                                              |                        |
| 6  | Key results              | 18 | Summarise key results with reference to study objectives                                                                                                                                                     | 10                     |
| 7  | Limitations              | 19 | Discuss limitations of the study, taking into account sources of potential bias or imprecision. Discuss both direction and magnitude of any potential bias                                                   | 10-11                  |
| 8  | Interpretation           | 20 | Give a cautious overall interpretation of results considering objectives, limitations, multiplicity of analyses, results from similar studies, and other relevant evidence                                   | 11-12                  |
| 9  | Generalisability         | 21 | Discuss the generalisability (external validity) of the study results                                                                                                                                        | 11                     |
| 10 | <b>Other information</b> |    |                                                                                                                                                                                                              |                        |
| 11 | Funding                  | 22 | Give the source of funding and the role of the funders for the present study and, if applicable, for the original study on which the present article is based                                                | 1 & 5                  |

\*Give information separately for exposed and unexposed groups.

**Note:** An Explanation and Elaboration article discusses each checklist item and gives methodological background and published examples of transparent reporting. The STROBE checklist is best used in conjunction with this article (freely available on the Web sites of PLoS Medicine at <http://www.plosmedicine.org/>, Annals of Internal Medicine at <http://www.annals.org/>, and Epidemiology at <http://www.epidem.com/>). Information on the STROBE Initiative is available at <http://www.strobe-statement.org>.

# BMJ Open

## Socioeconomic position and perceived barriers to accessing mental health care for individuals with symptoms of depression: Results from the Lolland-Falster Health Study.

|                                 |                                                                                                                                                                                                                                                                                                                                                                                                                                                                                |
|---------------------------------|--------------------------------------------------------------------------------------------------------------------------------------------------------------------------------------------------------------------------------------------------------------------------------------------------------------------------------------------------------------------------------------------------------------------------------------------------------------------------------|
| Journal:                        | <i>BMJ Open</i>                                                                                                                                                                                                                                                                                                                                                                                                                                                                |
| Manuscript ID                   | bmjopen-2018-023844.R1                                                                                                                                                                                                                                                                                                                                                                                                                                                         |
| Article Type:                   | Research                                                                                                                                                                                                                                                                                                                                                                                                                                                                       |
| Date Submitted by the Author:   | 18-Oct-2018                                                                                                                                                                                                                                                                                                                                                                                                                                                                    |
| Complete List of Authors:       | Packness, Aake; Syddansk Universitet Det Sundhedsvidenskabelige Fakultet, Public Health; Psykiatrien i Region Sjælland, Psychiatric Research Unit<br>Halling, Anders; Lund University, Clinical sciences Malmo, CRC<br>Simonsen, Erik; University of Copenhagen, Department of Clinical Medicine<br>Waldorff, Frans; University of Southern Denmark, Research Unit for General Practice, Health Science Department<br>Hastrup, Lene; Psychiatric Research Unit, Region Zealand |
| <b>Primary Subject Heading</b>: | Mental health                                                                                                                                                                                                                                                                                                                                                                                                                                                                  |
| Secondary Subject Heading:      | Public health, Health services research                                                                                                                                                                                                                                                                                                                                                                                                                                        |
| Keywords:                       | Depression & mood disorders < PSYCHIATRY, MENTAL HEALTH, Organisation of health services < HEALTH SERVICES ADMINISTRATION & MANAGEMENT, PRIMARY CARE, PUBLIC HEALTH                                                                                                                                                                                                                                                                                                            |
|                                 |                                                                                                                                                                                                                                                                                                                                                                                                                                                                                |

SCHOLARONE™  
Manuscripts

# Socioeconomic position and perceived barriers to accessing mental health care for individuals with symptoms of depression: Results from the Lolland-Falster Health Study.

A Packness, A Halling, E Simonsen, FB Waldorff, LH Hastrup

Department of Public Health, University of Southern Denmark, DK-5000 Odense, Denmark. Aake Packness, MPH, Research Unit for General Practice, University of Southern Denmark. Anders Halling, professor, Center for Primary Health Care Research, Institute of Clinical Sciences, Malmö, Lund University, SE-20213, Sweden.; Erik Simonsen, professor, Department of Clinical Medicine, University of Copenhagen, Psychiatric Research Unit, Region of Zealand, Denmark; Frans B Waldorff, professor, Department of Public Health, University of Southern Denmark, DK-5000 Odense, Denmark. Lene H Hastrup, senior researcher, Psychiatric Research Unit, Region of Zealand, DK-4200 Slagelse, Denmark.

Correspondence to: A Packness [apackness@health.sdu.dk](mailto:apackness@health.sdu.dk)  
ORCID-0000-0002-4695-6214

Research Unit of General Practice, Institute of Public Health, J.B. Winsløvs Vej 9A, DK-5000 Odense C, Denmark. Telephone: +45 20537264

Word count 4,670 (excl. tables)/ 5,386 (incl. tables)

The Corresponding Author has the right to grant on behalf of all authors and does grant on behalf of all authors, an exclusive licence on a worldwide basis to the BMJ Publishing Group Ltd to permit this article (if accepted) to be published in BMJ editions and any other BMJ PGL products and sub-licences such use and exploit all subsidiary rights, as set out in our licence.

All authors have completed the Unified Competing Interest form (available on request from the corresponding author) and declare: no support from any organisation for the submitted, no financial relationships with any organisations that might have an interest in the submitted work in the previous three years, and no other relationships or activities that could appear to have influenced the submitted work.

Funding: The study has been supported by an unrestricted grant (No 15-000342) from the Health Research Foundation of Region Zealand.

## Transparency declaration

Aake Packness affirms that this manuscript is an honest, accurate, and transparent account of the study being reported, that no important aspects of the study have been omitted, and that any discrepancies from the study as planned have been explained.

## Abstract

**Objective:** To evaluate if perceived barriers to accessing mental health care (MHC) among individuals with symptoms of depression are associated with their socioeconomic position (SEP).

**Design:** Cross-sectional questionnaire-based population survey from the Lolland-Falster Health Study (LOFUS) 2016-17 including 5,076 participants.

**Participants:** The study included 372 individuals participating in LOFUS with positive scores for depression according to the Major Depression Inventory (MDI).

**Interventions:** A set of five questions on perceived barriers to accessing professional care for a mental health problem was prompted to individuals responding with symptoms of depression (MDI score >20).

**Outcomes:** The association between SEP (as measured by educational attainment, employment status, and financial strain) and five different types of barriers to accessing MHC were analysed in separate multivariable logistic regression models adjusted for gender and age.

**Results:** 314 out of 372 (84%) completed the survey questions and reported experiencing barriers to MHC access. Worry about expenses related to seeking or continuing MHC was a considerable barrier for 30% of the individuals responding, and as such the greatest problem among the five types of barriers. 22% perceived stigma as a barrier to accessing MHC, but there was no association between perceived stigma and SEP. Transportation was the barrier of least concern for individuals in general, but also the issue with greatest and most consistent socioeconomic disparity (odds ratio (OR) 2.99; confidence interval (CI) 1.19 – 7.52) for lowest vs highest educational groups, and likewise concerning expenses (OR 2.77, CI 1.34 – 5.76) for the same groups.

**Conclusion:** Issues associated with *Expenses* and *Transport* were more frequently perceived as barriers to accessing MHC for people in low SEP compared to people in high SEP. Stigma showed no association to SEP.

Informed written consent was obtained. Region Zealand's Ethical Committee on Health Research (SJ-421) and the Danish Data Protection Agency (REG-24-2015) approved the study.

### Strengths and limitations of this study:

- A strength of this study is that it is a population study in a socioeconomically-deprived area and combines data on present depression scores and SEP with proportions of perceived barriers to accessing mental health care services; thus, the study can shed light on factors that deter individuals with symptoms of depression from seeking MHC services.
- The questions used to assess barriers to accessing mental health care are not standardized, although they were validated for content and do have external validity.
- There was a potential overlap in the questions, between transportation barriers and barriers of expenses related to seeking or continuing mental health care services. Thus it was not clear whether "expenses" included "transport expenses" and whether transport was a logistical or economical barrier.

## Introduction

Major depressive disorders (MDD) rank third among leading causes of years lived with disability (YLD) in high-income countries, as MDD is common and has an early onset.<sup>1</sup> Mental health problems in early age can have a profound impact on educational achievements<sup>2</sup>, on income<sup>3</sup>, and on later unemployment<sup>4</sup>. Additionally, having a diagnosis of depression is associated with a substantially shorter life expectancy<sup>5</sup>.

In spite of this, far from all people suffering from depression are treated. In a Norwegian survey study only 12% of respondents with symptoms of depression had ever sought help<sup>6</sup>, and a Canadian study found that 40% with symptoms of depression or anxiety perceived an unmet need for care<sup>7</sup>. Generally, treatment of patients suffering from depression is insufficient even in high-income countries, as only one in five receives adequate treatment<sup>8</sup>.

Depressive disorders are closely associated with socioeconomic position (SEP). A dose response relationship has been found between income as well as education on incidence, prevalence, and persistence of depression<sup>9</sup>. Likewise, studies have found negative socioeconomic changes increase the risk of incidents of mental disorders, particularly of mood disorders<sup>10</sup>, and financial strain in itself is associated with depressive disorder<sup>11</sup><sup>12</sup>.

Thus, people in low SEP may have a higher need for mental health care due to increased incidence and prevalence of depression. A recent study found predictors of need for highly-specialized MDD care to be: depression severity, younger age at onset, prior poor treatment response, psychiatric comorbidity, somatic comorbidity, childhood trauma, psychosocial impairment, older age, and a socioeconomically disadvantaged status<sup>13</sup>. Although people in low SEP have an increased need for mental health services, it is not evident that they use more specialized care. Some studies have found access to specialist care to be based on clinical need, with little inequity in SEP<sup>14</sup><sup>15</sup><sup>16</sup>, whereas others report specialized mental health services as psychologist or psychiatrists are not provided equally to persons in low SEP according to need<sup>17</sup><sup>18</sup><sup>7</sup><sup>19</sup> or that higher SEP is associated with more usage of specialized mental health services<sup>20</sup><sup>21</sup>.

The background for initiating the present study was that health care statistics (unpublished) in 2013 revealed a significant disparity, as 20% fewer individuals in the most socioeconomically deprived municipality in Denmark (Lolland) had been in contact with out-patient mental health care (psychologist, private, or public psychiatry) than could be expected for the population size (unpublished). Several reasons may account for this discrepancy between expected higher need in a deprived area and actual use of mental health care services, one of them being perceptions of barriers that affect patients' choices or preferences, which we aimed to address in this study.

1  
2  
3  
4 The study objective was to evaluate if perceived barriers to accessing mental health care differ across  
5 individuals with symptoms of depression according to SEP. We thereby expected to gain knowledge valuable to  
6 addressing inequality in the use of mental health care services.  
7

## 8 **Method**

### 9 *Study design*

10 The study was conducted as a cross-sectional questionnaire-based population survey.  
11  
12

### 13 *Setting*

14 The Danish health care system is tax-funded and free at delivery for both primary and secondary care; for  
15 adults, dental care and psychotherapy are only partly subsidized<sup>22</sup>. The general practitioner (GP) fulfills a  
16 gatekeeper function, as specialized care is only free after GP referral. Psychotherapy by a psychologist is partly  
17 subsidized only for patients referred by a GP for specific conditions: reaction to specific traumatic events;  
18 moderate depression; and, specifically for citizens between 18 and 38 years old, moderate anxiety disorders. In  
19 2014, the out of pocket cost to individuals partly subsidised at time of service was equivalent to 52€ for the  
20 first consultation and 44€ for the following sessions<sup>23</sup>.  
21  
22  
23

### 24 *Study population and data sources*

25 The Lolland-Falster Health Study (LOFUS) is a publicly funded population survey conducted in the two remote  
26 municipalities of Lolland and Guldborgsund, located in a socioeconomically deprived area of Denmark that is a  
27 1½-2 hours' drive south from the capital Copenhagen. In the 2017 national ranking of all 98 municipalities  
28 these two were ranked the most deprived and the 8<sup>th</sup> most deprived municipalities<sup>24</sup>. Together, the  
29 municipalities comprise 103,000 citizens, 50% being 50 years of age or older<sup>25</sup> in 2017. The study aims to enroll  
30 25,000 participants of all ages and is conducted from 2016 to 2020. Participants are randomly selected by civil  
31 registration numbers<sup>26</sup>, invited by mail, and re-invited by phone. The study covers several health areas: mental  
32 health, health literacy, social issues, genetics, kidney, ear nose & throat problems, and more. Beyond  
33 questionnaire responses, LOFUS data contains blood samples and biometrics. The study is described in detail  
34 elsewhere. The present study relies on responses to the questionnaire from adults, with data drawn from  
35 LOFUS at the end of 2017, while data collection was still ongoing.  
36  
37  
38  
39  
40

41 The subjects included in this study are respondents with symptoms of depression. All respondents who scored  
42 >20 on the Major Depression Inventory (MDI) were prompted the specific questions on perceived barriers to  
43 seeking help for mental health problems, which are described below.  
44

### 45 *Independent variables*

#### 46 *Major Depression Inventory*

47 As part of the LOFUS questionnaire, the respondents filled out the Major Depression Inventory (MDI). The MDI  
48 is based on the 12-item Likert scale and has been found to have an adequate internal and external validity for  
49 defining different stages of depression<sup>27</sup>. The MDI is based on the ICD-10 diagnostic criteria for depressive  
50 disorder<sup>28</sup>, with scores ranging from 0 to 50. We used the sum score after excluding the lowest score on  
51 question 8 or 9 and likewise the lowest score on item 11 or 12, which measured increased/decreased  
52 restlessness and increased/decreased appetite, respectively<sup>29</sup>. Mild depression is covered by scores from 21 –  
53  
54  
55  
56  
57  
58  
59  
60



1  
2  
3  
4 25, moderate depression from 26 – 30 and severe depression by scores from 31 – 50<sup>30</sup>. If more than two items  
5 were missing in the MDI, the score was categorized as missing<sup>31</sup>.  
6  
7

### 8 *Socioeconomic position*

9 SEP was measured by employment status, educational attainment, and financial strain. Usually income status  
10 is included as measure of SEP but information on income was not an item in the questionnaire. Financial strain  
11 is not the optimal measurement of SEP; however, it has been found to be associated with having a depressive  
12 and/or anxiety disorder, above the effect of income, and to be negatively but not strongly correlated with  
13 income ( $r=-0.41$ ,  $p<0.001$ )<sup>11</sup>.  
14  
15

16 Employment status was gathered using 14 different items in the questionnaire. Respondents over the age of 67  
17 were categorized as retired, unless they were employed. The categories of employment were reduced to four  
18 in the analyses: Working (employee; self-employed; combined employee and self-employed; military;  
19 secondary school pupil; postsecondary student; apprentice; house-wife/husband); Temporary not working  
20 (unemployed; rehabilitation; sickness leave 3 months or more); Retired (retired due to age; disability benefit;  
21 early retirement); and Other (Other).  
22  
23  
24

25 Educational attainment was measured and classified as the following: *no postsecondary education* if the  
26 respondent did not complete any postsecondary education; *1-3 years postsecondary education* for vocational  
27 or academy/professional graduates of 1 - 3 years; *3+ postsecondary education* for baccalaureate matriculants  
28 who completed 3 - 4 years; and *academic* for those who completed graduate study of  $\geq 5$  years.  
29  
30

31 The questionnaire gathered responses concerning financial strain with the following question: *How often*  
32 *within the last 12 months have you had problems paying your bills?* With possible answers: *Never; Few months;*  
33 *Approximately half the months in the year; Every month.* In the analysis, the categories were reduced to three  
34 to gain power, merging *Approximately half the months in the year* and *Every month* into one category.  
35  
36

### 37 ***Extrinsic variables:***

38 Sociodemographic variables included were gender, age, marital status, and cohabitation.  
39  
40

41 Questions on *Self-perceived general health* (SRH) were provided to respondents with a five-point Likert scale  
42 from *very good* to *very bad*. In addition, the presence of a *Long-standing health problem* was posed as a binary  
43 question and *General activity limitation* was gauged in three grades from *severely limited* to *not at all*. These  
44 questions were adopted from the European Health Status Module<sup>32</sup>.  
45  
46

47 The questionnaire included inquiries regarding past and present medical problems; specifically concerning  
48 mental health status, the respondents were asked if they presently suffered or had ever suffered from anxiety  
49 disorder and/or depression.  
50

### 51 ***Dependent variables***

52 We developed a short list of questions to be included in the LOFUS questionnaire for respondents who scored  
53 positive for symptoms of depression. The questions were inspired by the *Barriers to Access to Care Evaluation*  
54  
55  
56  
57  
58  
59

questionnaire by Sara Clement et al.<sup>33</sup>. Their questionnaire contains 30 items, which was too many to include in the LOFUS study (see supplementary table 1). The number of questions was reduced and grouped to cover the individual abilities in approaching care as described by Levesque et al.<sup>34</sup>: ability to perceive; ability to seek; ability to reach; ability to pay; and ability to engage (see further description in the supplementary material, Figure 1). A preliminary question on whether considering seeking care had ever been a problem was prompted before the five questions related to the abilities/perceived barriers:

*Have any of the reasons listed below prevented, delayed, or discouraged you from getting or continuing professional care for a mental health problem?*

*It has had an impact, that I ..*

- 1) ... have been unsure what to do to get professional care. (termed "Knowledge" in the following)
- 2) ... have been concerned for what others might think, say or do. (termed "Stigma")
- 3) ... have had difficulty with transport or travelling for treatment. (termed "Transport")
- 4) ... have not been able to afford the expenses that followed. (termed "Expense")
- 5) ... have had bad experiences with professional care for mental health problems. (termed "Experience")
- 6) These questions are not relevant for me/I do not want to answer.

Answers to question 1 – 5 were listed in four grades ranging from *Not at all* to *Quite a lot*; question 6 was binary.

In a preliminary form, the questions were evaluated for content validity in a focus group interview consisting of a group of ten patients and relatives of psychiatric patients (the Panel of Relatives and Patients of Psychiatry Services in Region Zealand) in December 2014. The group found the themes relevant and the questions understandable. They offered some suggestions for rephrasing, which were subsequently followed. The same panel commented on the preliminary results of the study in December 2017.

### **Statistical analysis**

For respondents with symptoms of depression we estimated the association between SEP and the outcome variables (five types of barriers to MHC: knowledge; stigma; transport; expense; experience) in separate multivariable logistic regression models after excluding respondents replying *Not relevant*. Likewise, we performed the same analyses with the three grades of depression (mild, moderate and severe) and depression score uncategorized (MDI score) as independent variables, which is presented as supplementary material. The SEP categories were employment status, education, and financial strain. *Working, postsecondary education, and no economic distress* were used as reference categories.

The logistic regression models were adjusted for age (18-59 versus 60+) and gender in addition to the variables studied in the univariate (crude) analysis.

The significance level used was 5% throughout, and all reported confidence intervals were 95%. All statistical analyses were done in Stata 15<sup>35</sup>.

### ***Patient and Public Involvement***

The study objectives were discussed with the members of the Panel of Relatives and Patients of Psychiatry Services in Region Zealand along with the validation of the questions in December 2014. The preliminary results were discussed with the group again in December 2017. The final results were distributed to the group in February 2018 along with an invitation for additional comments. One member of the patient panel responded to the invitation and provided additional comments/discussion. Comments from patients are included in the discussion.

The published article will also be distributed to the patient panel.

### **Ethics**

Informed, written consent was obtained from all participants. The study – along with the Lolland-Falster Health Study – was approved by Region Zealand's Ethical Committee on Health Research (SJ-421) and the Danish Data Protection Agency (REG-24-2015).

### **Results**

Figure 1: Flow chart of sampling

#### *Sampling from Lolland-Falster Health Study*

By December 21, 2017, a total of 20,680 adults (age 18+) had been invited to the LOFUS study. By December 31, 2017, a total of 5,395 adults had replied to the questionnaire. 319 did not reply on the MDI score element or failed to fill in more than two answers in the test, leaving 5,076, of whom 372 (7.3%) reported symptoms of depression and thus were prompted the questions on perceived barriers to seeking mental health care. 58 replied that the questions were not relevant or would not answer them, thus 314 individuals with a MDI score >20 were included in the analyses of SEP and perceived barriers.

Table 1. Characteristics of study sample and respondents with symptoms of depression

| Table 1. Characteristics of study sample and respondents with symptoms of depression (MDI >20) |              |             |             |      |               |            |
|------------------------------------------------------------------------------------------------|--------------|-------------|-------------|------|---------------|------------|
| Age group                                                                                      | Total sample |             |             |      | MDI score >20 |            |
|                                                                                                | Male         | Female      | Total       | %    | N             | %          |
| 18-29                                                                                          | 198          | 212         | 410         | 8.1  | 55            | 13.4       |
| 30-39                                                                                          | 180          | 250         | 430         | 8.5  | 41            | 9.5        |
| 40-49                                                                                          | 357          | 443         | 800         | 15.8 | 82            | 10.3       |
| 50-59                                                                                          | 519          | 681         | 1200        | 23.6 | 84            | 7.0        |
| 60-69                                                                                          | 632          | 666         | 1298        | 25.6 | 63            | 4.9        |
| 70-79                                                                                          | 396          | 371         | 767         | 15.1 | 41            | 5.3        |
| 80+                                                                                            | 95           | 76          | 171         | 3.4  | 6             | 3.5        |
| <b>Sum</b>                                                                                     | <b>2377</b>  | <b>2699</b> | <b>5076</b> |      | <b>372</b>    | <b>7.3</b> |
| <b>Marital status</b>                                                                          |              |             |             |      |               |            |
| Married                                                                                        | 1538         | 1708        | 3246        | 64.5 | 181           | 5.6        |
| Partnership                                                                                    | 73           | 108         | 181         | 3.6  | 15            | 8.3        |
| Separated                                                                                      | 12           | 9           | 21          | 0.4  | 5             | 23.8       |
| Divorced                                                                                       | 169          | 195         | 364         | 7.2  | 31            | 8.5        |
| Widower                                                                                        | 59           | 164         | 223         | 4.4  | 11            | 4.9        |
| Not married                                                                                    | 509          | 487         | 996         | 19.8 | 122           | 12.2       |
| <b>Cohabiting</b>                                                                              |              |             |             |      |               |            |
| Yes                                                                                            | 1917         | 2141        | 4058        | 80.7 | 248           | 6.1        |
| <b>Secondary schooling</b>                                                                     |              |             |             |      |               |            |
| Studying                                                                                       | 20           | 34          | 54          | 1.1  | 5             | 9.3        |
| < 8 years                                                                                      | 290          | 203         | 493         | 9.7  | 35            | 7.1        |
| 8 - 9 years                                                                                    | 610          | 401         | 1011        | 19.9 | 87            | 8.6        |
| 10 - 11 years                                                                                  | 751          | 913         | 1664        | 32.8 | 112           | 6.7        |
| High school                                                                                    | 522          | 896         | 1418        | 27.9 | 89            | 6.3        |
| Other/foreign                                                                                  | 163          | 215         | 378         | 7.4  | 38            | 10.1       |
| <b>Postsecondary education</b>                                                                 |              |             |             |      |               |            |
| No postsecondary                                                                               | 415          | 529         | 944         | 18.6 | 112           | 11.9       |
| 1-3 years postsecondary                                                                        | 1307         | 1238        | 2545        | 50.1 | 172           | 6.8        |
| 3+ years postsecondary                                                                         | 495          | 784         | 1279        | 25.2 | 63            | 4.9        |
| Other                                                                                          | 143          | 122         | 265         | 5.2  | 21            | 7.9        |
| <b>Occupational status</b>                                                                     |              |             |             |      |               |            |
| Work/study                                                                                     | 1417         | 1526        | 2943        | 58.0 | 167           | 5.7        |
| Temp. No work                                                                                  | 68           | 121         | 189         | 3.7  | 63            | 33.3       |
| Retired                                                                                        | 843          | 966         | 1809        | 35.6 | 115           | 6.4        |
| Other                                                                                          | 47           | 77          | 124         | 2.4  | 27            | 21.8       |
| <b>Financial strain</b>                                                                        |              |             |             |      |               |            |
| Not at all                                                                                     | 2136         | 2404        | 4540        | 89.4 | 275           | 6.1        |
| Few months                                                                                     | 175          | 213         | 388         | 7.6  | 60            | 15.5       |
| Half the months                                                                                | 23           | 22          | 45          | 0.9  | 13            | 28.9       |
| Every month                                                                                    | 25           | 32          | 57          | 1.1  | 19            | 33.3       |
| <b>Self-rated health</b>                                                                       |              |             |             |      |               |            |
| Very good                                                                                      | 306          | 328         | 634         | 12.5 | 7             | 1.1        |
| Good                                                                                           | 1348         | 1524        | 2872        | 56.6 | 83            | 2.9        |
| Fair                                                                                           | 616          | 697         | 1313        | 25.9 | 181           | 13.8       |
| Bad                                                                                            | 89           | 137         | 226         | 4.5  | 90            | 39.8       |
| Very bad                                                                                       | 12           | 6           | 18          | 0.4  | 9             | 50.0       |
| <b>General activity limitation</b>                                                             |              |             |             |      |               |            |
| Not limited at all                                                                             | 1561         | 1630        | 3191        | 63.2 | 114           | 3.6        |
| Limited but not severely                                                                       | 672          | 906         | 1578        | 31.3 | 166           | 10.5       |
| Severely limited                                                                               | 132          | 146         | 278         | 5.5  | 88            | 31.7       |
| <b>Longstanding illness. Yes</b>                                                               | 1052         | 1200        | 2252        | 44.7 | 244           | 10.8       |
| <b>Anxiety, now or earlier. Yes</b>                                                            | 110          | 223         | 333         | 6.6  | 111           | 33.3       |
| <b>Depression, now or earlier. Yes</b>                                                         | 145          | 230         | 375         | 7.4  | 138           | 36.8       |
| <b>Medication anxiety. Yes</b>                                                                 | 71           | 119         | 190         | 3.8  | 65            | 34.2       |
| <b>Medication antidepressants. Yes</b>                                                         | 85           | 173         | 258         | 5.1  | 66            | 25.6       |

1  
2  
3  
4  
5  
6 The total sample consisted of 53% women; 64.5% of the respondents were married, and 80.7% were  
7 cohabitating. For the total group, mean age was 55.7 and median age was 57.4; for individuals scoring in the  
8 depressed range on the MDI, the mean age was 50.2 and the median was 51.4 years.  
9

10  
11 Compared to the total sample, the respondents reporting symptoms of depression were younger, and more  
12 likely to be living alone, and to be unmarried. They were also more likely to have no postsecondary education,  
13 to be temporarily out of work (16.9% vs 3.7%), and to experience more frequent financial strain. Furthermore,  
14 their health indicators included: lower self-rated health, more reports of limited physical functioning, more  
15 reports of long lasting disease, and former anxiety or depression diagnoses; and more reports to be currently in  
16 pharmacological treatment for these disorders.  
17  
18

19  
20 *Figure 2. Responses on perceived barriers to accessing mental health care, proportions*  
21  
22  
23

24 Of those responding to the questions, more than half perceived no problems at all in accessing professional  
25 care, least of all transport.  
26

27 Among those who did have concerns about accessing or continuing professional mental health care, *Expense*  
28 was the most common problem, as 30.1% indicated expenses had prevented, deterred, or delayed them either  
29 *Quite a lot* or *A lot* (both responses aggregated in the *Quite a lot +* category in Figure 2). Likewise, the second  
30 most common concern was related to *Stigma*, phrased in the questionnaire as “what others might think, say or  
31 do”, which was a serious concern for 22.3%; approximately the same proportion (21.2%) had concerns related  
32 to *Knowledge*, or how to find help for a mental health problem. Transport was not a problem for 78.6%, with  
33 only 11.7% reporting it negatively affected access.  
34  
35  
36

37 Perceived barriers to accessing health care by SEP are shown in Table 2 (crude numbers are shown in  
38 Supplementary Table 2). Perceptions of *Stigma* did not show any significant difference across the  
39 socioeconomic groups, however measured. *Lack of Knowledge* was a significant problem for respondents  
40 without postsecondary education compared to those who had completed some postsecondary education  
41 (adjusted odd ratio (aOR) 2.26 confidence interval (CI) 1.1- 4.6) and for respondents with occasional (*Few*  
42 *months*), but not regular, financial strain when compared to those with no financial strain. Low SEP as  
43 measured by educational level and financial strain was associated with perceived barriers concerning *Transport*  
44 and *Expense*; whereas low SEP measured by employment status alone was associated with concerns related to  
45 *Transport*. The retired respondents were more likely to perceive bad *Experience* with mental health services as  
46 a barrier to seeking or continuing MHC compared to respondents who were working. *Transport* showed the  
47 greatest disparity across the socioeconomic groups.  
48  
49  
50  
51  
52  
53  
54  
55  
56  
57  
58  
59  
60

Table 2. Adjusted odds ratios for perceived barriers for accessing MHC by three indicators of SEP

| Table 2. Adjusted odds ratios for five perceived barriers accessing mental health care by employment status, education, and financial strain |                   |              |               |     |                  |              |              |               |                  |              |              |               |
|----------------------------------------------------------------------------------------------------------------------------------------------|-------------------|--------------|---------------|-----|------------------|--------------|--------------|---------------|------------------|--------------|--------------|---------------|
| Stigma                                                                                                                                       | Employment status |              |               | n   | Education        |              |              | n             | Financial strain |              |              | n             |
|                                                                                                                                              | aOR               | CI           |               |     | aOR              | CI           |              |               | aOR              | CI           |              |               |
| Working                                                                                                                                      | 1                 |              |               | 291 | 3+ years         | 1            |              | 290           | Not at all       | 1            |              | 289           |
| Temp. Not working                                                                                                                            | .9201             | .4880        | 1.735         |     | 1-3 years        | 1.087        | .5740        | 2.058         | Few months       | .8994        | .4841        | 1.671         |
| Retired                                                                                                                                      | .6808             | .3420        | 1.356         |     | No postsecondary | 1.166        | .5833        | 2.332         | Half the time+   | 1.749        | .6933        | 4.410         |
| Other                                                                                                                                        | .3815             | .1431        | 1.017         |     | Other            | .6699        | .1969        | 2.279         |                  |              |              |               |
| <b>Knowledge</b>                                                                                                                             |                   |              |               |     |                  |              |              |               |                  |              |              |               |
| Working                                                                                                                                      | 1                 |              |               | 292 | 3+ years         | 1            |              | 291           | Not at all       | 1            |              | 290           |
| Temp. Not working                                                                                                                            | 1.204             | .6390        | 2.268         |     | 1-3 years        | 1.597        | .8309        | 3.070         | Few months       | <b>2.515</b> | <b>1.335</b> | <b>4.739</b>  |
| Retired                                                                                                                                      | .5003             | .2480        | 1.009         |     | No postsecondary | <b>2.263</b> | <b>1.115</b> | <b>4.592</b>  | Half the time+   | 2.372        | .9404        | 5.985         |
| Other                                                                                                                                        | .5004             | .1884        | 1.329         |     | Other            | <b>4.752</b> | <b>1.297</b> | <b>17.412</b> |                  |              |              |               |
| <b>Expense</b>                                                                                                                               |                   |              |               |     |                  |              |              |               |                  |              |              |               |
| Working                                                                                                                                      | 1                 |              |               | 289 | 3+ years         | 1            |              | 288           | Not at all       | 1            |              | 289           |
| Temp. Not working                                                                                                                            | 1.700             | .8911        | 3.323         |     | 1-3 years        | 1.835        | .9324        | 3.612         | Few months       | <b>4.268</b> | <b>2.172</b> | <b>8.385</b>  |
| Retired                                                                                                                                      | 1.537             | .7451        | 3.171         |     | No postsecondary | <b>2.773</b> | <b>1.336</b> | <b>5.757</b>  | Half the time+   | <b>9.623</b> | <b>2.708</b> | <b>34.194</b> |
| Other                                                                                                                                        | .7456             | .2822        | 1.970         |     | Other            | 2.031        | .5762        | 7.156         |                  |              |              |               |
| <b>Experience</b>                                                                                                                            |                   |              |               |     |                  |              |              |               |                  |              |              |               |
| Working                                                                                                                                      | 1                 |              |               | 287 | 3+ years         | 1            |              | 286           | Not at all       | 1            |              | 286           |
| Temp. Not working                                                                                                                            | .9581             | .4820        | 1.905         |     | 1-3 years        | 1.043        | .5392        | 2.019         | Few months       | 1.152        | .5999        | 2.212         |
| Retired                                                                                                                                      | <b>2.143</b>      | <b>1.024</b> | <b>4.485</b>  |     | No postsecondary | .6435        | .3073        | 1.347         | Half the time+   | 2.385        | .9685        | 5.874         |
| Other                                                                                                                                        | 1.531             | .5932        | 3.952         |     | Other            | .7503        | .2024        | 2.781         |                  |              |              |               |
| <b>Transport</b>                                                                                                                             |                   |              |               |     |                  |              |              |               |                  |              |              |               |
| Working                                                                                                                                      | 1                 |              |               | 290 | 3+ years         | 1            |              | 289           | Not at all       | 1            |              | 288           |
| Temp. Not working                                                                                                                            | <b>3.184</b>      | <b>1.463</b> | <b>6.931</b>  |     | 1-3 years        | 1.603        | .6502        | 3.954         | Few months       | 1.746        | .8392        | 3.634         |
| Retired                                                                                                                                      | <b>4.442</b>      | <b>1.900</b> | <b>10.384</b> |     | No postsecondary | <b>2.988</b> | <b>1.187</b> | <b>7.518</b>  | Half the time+   | <b>9.889</b> | <b>3.745</b> | <b>26.113</b> |
| Other                                                                                                                                        | 2.169             | .6948        | 6.773         |     | Other            | 1.019        | .1835        | 5.659         |                  |              |              |               |

Adjusted for: gender; age +/- 60; 95% confidence intervals (CI), significant results are marked in bold

SEP showed no association with any of the barriers or with years of schooling (not shown). Using depression as independent variable, we found that severity of depression (both measured as a categorical variable and a score) was associated with perceived barriers in relation to *Expense* and *Transport*, but not associated with any other perceived barriers (see Supplementary Material Table 3).

## Discussion

### Principal findings

In this study of perceived barriers to accessing mental health care by respondents with present symptoms of depression, we found that almost 1/3 of the respondents indicated that *Expense* related to accessing MHC was a considerable barrier; this perception was more prevalent among individuals without postsecondary education and individuals experiencing financial strain. Transport presented the least prevalent barrier in general; but on the other hand, transportation also presented the greatest and most consistent socioeconomic disparity across all measurements of SEP. Transport and expenses associated with accessing mental health care were a problem for disadvantaged individuals.

Stigma was an issue of concern for 22% of the respondents but did not vary significantly according to SEP, whereas lack of knowledge about how to get help was a significantly greater problem for individuals without postsecondary education as compared to individuals with postsecondary education.

Lack of knowledge about how get to help and bad experience were perceived as a problem for 1/5 of the individuals overall as well.

#### *Strengths and weaknesses of the study*

A strength of this study was its use of information from a population study from a deprived area in combination with data on present depression score, information on SEP, and perceived barriers to accessing MHC; by this design we were able to determine the significance of different barriers to access for potential MHC patients in a deprived area. We are not aware of similar studies.

A limitation in our study was that the items used as dependable variables were not fully validated; validation would be preferable in order to compare to other studies. The BACE-3, at 30 questions, was too extensive to use in the LOFUS study, which already consisted of close to 100 questions; this was also the reasoning behind our focus on five central concepts of barriers to access. The external validity of the questions is supported by the use of generally accepted and validated concepts of abilities and as such is comparable to other studies. The content validity was tested by the panel of patients and patients' relatives and the questions found to be sound, but in retrospect, might not measure the concept of self-efficacy very well. We used the answer *Not relevant/Do not want to reply* as an indicator that the individual preferred to handle problems without help. It would have been prudent, however, to ask a more direct question about perceptions of need for care; it is possible that some individuals did not find the question relevant because while they experienced mental health issues, they did not perceive a need for further care. We found no correlation between the answer to the question of relevance and SEP, except for retired respondents, who tended to state *Not relevant* less, compared to respondents working (not shown).

Another limitation was that the question about transport was not clearly separated from the question about perceived barriers in relation to expenses, as it was not specified whether expenses included transportation-related expenses. Thus, we have no clear distinction between whether *Transport* as a barrier is primarily a logistical or economical barrier, or some combination thereof.

#### *Comparison with other studies*

The total sample contained more respondents in the age group 50 – 69 and fewer in the age groups younger and older compared to the study population; additionally, as compared to the background population the LOFUS sample is over represented by individuals with *+3 years postsecondary education vs no postsecondary education* by almost 3:1, according to general population statistics drawn from Statistics Denmark<sup>25</sup>. For the total sample, questions on self-rated health (SRH) were rated higher in the sample than the national levels<sup>36</sup> even though long-lasting illness was more prevalent in the sample (44.7% compared to national rate of 35.6%)<sup>36</sup>; the rate of respondents with *severely limited physical functioning* was close to the national proportions<sup>37</sup>. The group with symptoms of depression had scores well below national levels in all health-related variables. The total sample may overrepresent the middle-aged to older part of the population, an issue seen in national surveys, too<sup>38</sup>.

7.3% had symptoms of depression when the summed MDI score was used, which is a considerably higher rate than found by any other survey in Denmark; however, a recent national survey reported that 7.0% adults suffer from depressed mood, including 7.8% in the Region of Zealand<sup>36</sup>. Eurostat reported a prevalence of 6.3% adults with depressive symptoms and 3% with major depression symptoms in Denmark<sup>39</sup>. In the present study, 225 respondents reported both a core symptom of depression *Most of the time* or more and a summed MDI score

1  
2  
3  
4 >20, equivalent to a MDD prevalence of 4.4%. A comparable study by Ellervik et al. found 2.5% with a summed  
5 MDI score >25; we found 3.8%<sup>40</sup>. The present data is a subsample from a population survey in a deprived area,  
6 which could explain the high rate of depression symptoms found.  
7

8  
9 We found perceived stigma to be of *Quite a lot* or *A lot of concern* for 20% of the respondents. This  
10 corresponds with findings in a systematic review, where overall 20 – 25% respondents in 44 studies reported  
11 stigma as a barrier to accessing mental health services<sup>41</sup>. Stigma showed no association to SEP in our data. We  
12 have not been able to verify this in other studies except for one Canadian study, which likewise found no  
13 association between years of education and experiencing stigma in mental health care. However, they did find  
14 perceived stigma more prevalent among respondents not working<sup>42</sup>. In the Panel of Relatives and Patients of  
15 Psychiatry Services of Region Zealand, it was said that patients with mental disorders, and their relatives, pull  
16 the curtains together when they meet with each other privately, and that patients are indeed concerned with  
17 what others might think.  
18  
19  
20

21 One in five respondents experienced *Knowledge* as a barrier and had doubts about what to do to get  
22 professional help. With free access to a GP in Denmark, and the GP universally understood to be the  
23 gatekeeper for referrals, this is puzzling. Among respondents with symptoms of depression, 138 reported  
24 former or present depression, and 35 of them (25%) still answered that they experienced *Knowledge* to be a  
25 barrier *Quite a lot* or *A lot* of the time. Of those with symptoms of depression and presently taking  
26 antidepressant medication, 8 (12%) had doubts about what to do to get help. This could be due to the nature  
27 of the disease, but we did not find support for this, as we found no association to *Knowledge* with the severity  
28 of symptoms of depression. However, a Canadian study on perceived unmet need by respondents with  
29 symptoms of anxiety or depression found high symptom scores were associated with a higher degree of unmet  
30 need<sup>7</sup>, and not knowing how or where to get help was the most reported reason. The Panel of Relatives and  
31 Patients of Psychiatry Services of Region Zealand was not very surprised by this finding: despite free access to a  
32 GP, one individual reported that he could not get a family-GP, but had to meet changing doctors in a regional  
33 clinic (due to lack of GP's in the area). Another mentioned the waiting time for an appointment with the GP  
34 could be weeks (due to lack of GP's).  
35  
36  
37  
38  
39

40 It could be argued that older people may be more reluctant to use MHC and feel more stigmatized by the need  
41 for psychotherapy<sup>43 44</sup>. We did not find support for this, as the retired group did not differ in perception of  
42 stigma from employed persons. Likewise, older retired persons might be less willing to pay for the expenses  
43 associated with treatment, but we did not find support for this either, as expense was not a significant barrier  
44 for the group retired compared to the group working.  
45  
46

47 Use of mental health care is sensitive to cost<sup>45</sup>, and especially so for persons in low SEP<sup>46</sup>. This corresponds with  
48 our findings that expenses associated with mental health care was considered a common barrier for seeking  
49 help and concern of almost 1/3 of our respondents, and by two- to five-fold more by respondents without  
50 postsecondary education or in financial strain. This knowledge is important when research has shown that  
51 financial strain is strongly associated with higher odds for depression<sup>11</sup> and for prescription of  
52 antidepressants<sup>47</sup>. A German study found that even with free access to a psychologist these services are used  
53  
54  
55  
56  
57  
58  
59  
60



1  
2  
3  
4 less by people in low SEP<sup>19</sup>, which could be explained in part by our findings; people without postsecondary  
5 education may have less knowledge of how to access professional MHC, thus leading to lower usage of  
6 available services.  
7

8  
9 Experience with former mental health care treatment made retired respondents more reluctant to seek MHC  
10 as compared to the working population. This may not necessarily be due to bad experiences with health care  
11 professionals, though stigmatization can be a problem in health services too<sup>48</sup>; reports of past experience as a  
12 barrier could also indicate bad experience with side effects from a medication. Our study was not designed to  
13 capture or explore this nuance. Retired individuals are more likely to have more experience with health care,  
14 and this group includes people receiving early retirement pensions, which could indicate a chronic illness  
15 leading to early retirement and thus more opportunities for more bad experiences. The patient panel  
16 questioned the respondents' experience with MHC, since the rates of bad past experiences were so low; one  
17 remarking: "Those who are really feeling bad have not participated in this survey". For the panel, bad  
18 experience was a common deterrent to MHC, which may indicate an important area of future study.  
19  
20  
21

22  
23 Transport was perceived to be a greater problem by persons in low SEP compared to individuals in high SEP.  
24 This aligns well with our previous findings of the impact of distance and SEP on MHC use by patients in  
25 antidepressant treatment<sup>21</sup>. However, the question was not well distinguished from the question on expenses.  
26 Difficulty with transport or travelling includes the time spent to reach services and coordinate with other  
27 obligations – taking care of family duties or take time off at work, etc. Reliance on infrequent or inadequate  
28 public transportation could also be a reason to answer positively to this question, but the study was not  
29 designed to capture information regarding public versus private transportation, e.g. The patient panel was  
30 surprised that transport was a minor issue for the respondents, since it was viewed by them to be both time-  
31 consuming and expensive.  
32  
33  
34  
35  
36  
37

### 38 *Meaning of the study and possible explanations and implication for policymakers*

39 The study aimed to evaluate if perceived barriers to accessing mental health care differ across individuals with  
40 symptoms of depression according to their SEP. The answer in this study is quite clear: lack of postsecondary  
41 education was linked to greater perceived barriers to mental health care and expenses are considered a barrier  
42 to mental health care for those with no postsecondary education and in financial strain. Low mental health  
43 literacy, defined as knowledge and beliefs about mental disorders which aid in their recognition, management  
44 and prevention<sup>49</sup>, could be a part of the explanation, since low mental health literacy is also associated with  
45 low SEP<sup>50</sup>. Thus, empowering the community to take action for better mental health literacy<sup>51</sup> can lead to  
46 increased help-seeking by individuals in low SEP. In Denmark, two programs on improving mental health  
47 literacy exist: Mental Health First Aid<sup>52</sup> and the ABC mental health initiative<sup>53</sup>, both adopted from Australia. An  
48 approach directed more specifically toward deprived areas within such programs might improve SEP equity in  
49 mental health care treatment.  
50  
51  
52  
53  
54  
55  
56  
57  
58  
59  
60

1  
2  
3  
4 Addressing barriers and easing access for the deprived is obviously necessary. Lack of postsecondary education  
5 is associated with greater prevalence of perception of barriers to mental health care, in addition to an  
6 increased prevalence of mood disorders. Clearly, our results showed that *Expense* is a barrier for people in low  
7 SEP, but as found in the German study<sup>19</sup>, people in low SEP use psychologists less frequently even with free  
8 access. Psychotherapy is associated with the ability to engage, which in itself could be more difficult if an  
9 individual struggles with social and economic problems on top of mental ones. In order to address these  
10 related barriers, the deprived and depressed probably have additional needs beyond medication and  
11 psychotherapy, such as social supports and social/domestic/workplace intervention.  
12  
13  
14

15 In a future study it could be interesting to investigate the association between depression score, perceived  
16 barriers and use of MHC for a period after the score. Future research could also investigate which experiences  
17 cause retired respondents with symptoms of depression to hesitate to access mental health care. Further  
18 improvements and validation of a short form questionnaire as the present could be beneficial.  
19  
20  
21

### 22 **Author contributions**

23 AP conceived the research and developed and validated the questions on barriers supervised by AH. AP wrote  
24 the first draft of the manuscript assisted by LHH. AH, ES, and FBW contributed to the data analysis,  
25 interpretation of results and critical revision of the manuscript.  
26  
27  
28  
29

### 30 **Acknowledgement**

31 With acknowledgement to the Panel of Relatives and Patients of Psychiatry Services of Region Zealand for  
32 contributing to validate the questions on perceived barriers and commenting on the outcomes, with special  
33 gratitude to Anja Bang. We thank LOFUS for providing the data and Randi Jepsen for kind support. We also  
34 thank the Health Research Foundation of Region Zealand for financial support and particularly former head  
35 nurse Tove Kjærbo for initiating the study.  
36  
37

38 Data sharing: No additional data available  
39  
40

### 41 **References**

- 42 1. Global, regional, and national incidence, prevalence, and years lived with disability for 328 diseases and  
43 injuries for 195 countries, 1990–2016: a systematic analysis for the Global Burden of Disease Study  
44 2016. *Lancet* 2017;390(10100):1211–59. doi: 10.1016/s0140-6736(17)32154-2 [published Online First:  
45 2017/09/19]
- 46 2. Elovainio M, Pulkki-Raback L, Jokela M, et al. Socioeconomic status and the development of depressive  
47 symptoms from childhood to adulthood: a longitudinal analysis across 27 years of follow-up in the  
48 Young Finns study. *Soc Sci Med* 2012;74(6):923–29. doi: S0277-9536(12)00021-4  
49 [pii];10.1016/j.socscimed.2011.12.017 [doi]
- 50 3. Asselmann E, Wittchen HU, Lieb R, et al. Sociodemographic, clinical, and functional long-term outcomes in  
51 adolescents and young adults with mental disorders. *Acta Psychiatr Scand* 2018;137(1):6–17. doi:  
52 10.1111/acps.12792 [published Online First: 2017/09/02]  
53  
54  
55  
56  
57  
58  
59  
60

4. Thielen K, Nygaard E, Andersen I, et al. Employment consequences of depressive symptoms and work demands individually and combined. *Eur J Public Health* 2014;24(1):34 - 39.
5. Laursen TM, Musliner KL, Benros ME, et al. Mortality and life expectancy in persons with severe unipolar depression. *J Affect Disord* 2016;193:203-7. doi: 10.1016/j.jad.2015.12.067. Epub;2016 Jan 6.:203-07.
6. Roness A, Mykletun A, Dahl AA. Help-seeking behaviour in patients with anxiety disorder and depression. *Acta Psychiatr Scand* 2005;111(1):51-58.
7. Dezetter A, Duhoux A, Menear M, et al. Reasons and Determinants for Perceiving Unmet Needs for Mental Health in Primary Care in Quebec. *Can J Psychiatry* 2015;60(6):284-93.
8. Thornicroft G, Chatterji S, Evans-Lacko S, et al. Undertreatment of people with major depressive disorder in 21 countries. *Br J Psychiatry* 2017;210(2):119-24.
9. Lorant V, Deliege D, Eaton W, et al. Socioeconomic inequalities in depression: a meta-analysis. *Am J Epidemiol* 2003;157(2):98-112.
10. Barbaglia MG, M. tH, Dorsselaer S, et al. Negative socioeconomic changes and mental disorders: a longitudinal study. *J Epidemiol Community Health* 2015;69(1):55-62.
11. Dijkstra-Kersten SM, Biesheuvel-Leliefeld KE, van der Wouden JC, et al. Associations of financial strain and income with depressive and anxiety disorders. *J Epidemiol Community Health* 2015:jech-205088.
12. Ahnquist J, Wamala SP. Economic hardships in adulthood and mental health in Sweden. The Swedish National Public Health Survey 2009. *BMC Public Health* 2011;11:788. doi: 10.1186/1471-2458-11-788.:788-11.
13. van Krugten FC, Kaddouri M, Goorden M, et al. Indicators of patients with major depressive disorder in need of highly specialized care: A systematic review. *PloS one* 2017;12(2):e0171659. doi: 10.1371/journal.pone.0171659 [published Online First: 2017/02/09]
14. Glozier N, Davenport T, Hickie IB. Identification and management of depression in Australian primary care and access to specialist mental health care. *Psychiatr Serv* 2012;63(12):1247-51. doi: 1392910 [pii];10.1176/appi.ps.201200017 [doi]
15. Dey M, Jorm AF. Social determinants of mental health service utilization in Switzerland. *Int J Public Health* 2017;62(1):85-93.
16. Boerema AM, Ten Have M, Kleiboer A, et al. Demographic and need factors of early, delayed and no mental health care use in major depression: a prospective study. *BMC psychiatry* 2017;17(1):367. doi: 10.1186/s12888-017-1531-8 [published Online First: 2017/11/18]
17. Vasiliadis HM, Tempier R, Lesage A, et al. General practice and mental health care: determinants of outpatient service use. *Can J Psychiatry* 2009;54(7):468-76.
18. Hansen AH, Høye A. Gender differences in the use of psychiatric outpatient specialist services in Tromsø, Norway are dependent on age: a population-based cross-sectional survey. *BMC Health Serv Res* 2015;15:. doi:10.1186/s12913-015-1146-z.:doi-1146.
19. Epping J, Muschik D, Geyer S. Social inequalities in the utilization of outpatient psychotherapy: analyses of registry data from German statutory health insurance. *Int J Equity Health* 2017;16(1):147-0644.
20. Evans-Lacko S, Aguilar-Gaxiola S, Al-Hamzawi A, et al. Socio-economic variations in the mental health treatment gap for people with anxiety, mood, and substance use disorders: results from the WHO World Mental Health (WMH) surveys. *Psychol Med* 2017:1-12. doi: 10.1017/s0033291717003336 [published Online First: 2017/11/28]
21. Packness A, Waldorff FB, Christensen RD, et al. Impact of socioeconomic position and distance on mental health care utilization: a nationwide Danish follow-up study. *Soc Psychiatry Psychiatr Epidemiol* 2017:10-1437. doi: doi: 10.1007/s00127-017-1437-2

22. Pedersen KM, Andersen JS, Sondergaard J. General practice and primary health care in Denmark. *J Am Board Fam Med* 2012;25 Suppl 1:S34-8. doi: 10.3122/jabfm.2012.02.110216.:S34-S38.
23. Larsen A. Psykologbehandling: [www.sundhed.dk](http://www.sundhed.dk); 2014 [updated 9/29/2014. Available from: [www.sundhed.dk/borger/sygdomme-a-aa/sociale-ydelser/sociale-ydelser/behandling/psykologbehandling/](http://www.sundhed.dk/borger/sygdomme-a-aa/sociale-ydelser/sociale-ydelser/behandling/psykologbehandling/)].
24. Ministry of Economics- and Interior. Key figures of municipalities [Public Database]. Økonomi- og Indenrigsministeriet; [Available from: [www.noegletal.dk](http://www.noegletal.dk) accessed 20/02/ 2018.
25. Statistics Denmark. StatBank Denmark [Public Database]. Statistics Denmark; [Available from: [www.statistikbanken.dk](http://www.statistikbanken.dk) accessed 11/11 2015.
26. Pedersen CB. The Danish Civil Registration System. *Scand J Public Health* 2011;39(7 Suppl):22-25.
27. Olsen LR, Jensen DV, Noerholm V, et al. The internal and external validity of the Major Depression Inventory in measuring severity of depressive states. *Psychol Med* 2003;33(2):351-56.
28. World Health Organization. The ICD-10 Classification of Mental and Behavioural Disorders 1995.
29. Bech P, Rasmussen NA, Olsen LR, et al. The sensitivity and specificity of the Major Depression Inventory, using the Present State Examination as the index of diagnostic validity. *J Affect Disord* 2001;66(2-3):159-64. [published Online First: 2001/10/02]
30. Bech P, Timmerby N, Martiny K, et al. Psychometric evaluation of the Major Depression Inventory (MDI) as depression severity scale using the LEAD (Longitudinal Expert Assessment of All Data) as index of validity. *BMC Psychiatry* 2015;15:190. doi: 10.1186/s12888-015-0529-3.:190-0529.
31. Bech P. Clinical Psychometrics. First ed. Oxford: John Wiley & Sons, Ltd. 2012:153-53.
32. European Union. European Health Interview Survey (EHIS wave 2). Methodological manual. Methodologies and Working papers ed. Luxembourg: Eurostat 2013:1-202.
33. Clement S, Brohan E, Jeffery D, et al. Development and psychometric properties the Barriers to Access to Care Evaluation scale (BACE) related to people with mental ill health. *BMC Psychiatry* 2012;12:36. doi: 1471-244X-12-36 [pii];10.1186/1471-244X-12-36 [doi]
34. Levesque JF, Harris MF, Russell G. Patient-centred access to health care: conceptualising access at the interface of health systems and populations. *Int J Equity Health* 2013;12:18. doi: 10.1186/1475-9276-12-18.:18-12.
35. Stata Statistical Software: Release 15. [program]. 1 version: College Station,TX:StataCorp LP., 2017.
36. Sundhedsstyrelsen NBoH. [Health of the Danes - The National Health Profile]. In: Jensen HD, M; Ekholm, O; Christensen AI, ed. København, 2018:1-134.
37. Johnsen NFD, M.; Michelsen S.I.; Juel K. [Health profile of adults with impaired or reduced physical functioning]. In: Folkesundhed Sif, ed. København: Syddansk Universitet, 2014:1-134.
38. National Board of Health. [Mental Health of Adult Danes]. København: Sundhedsstyrelsen 2010.
39. European Union. Eurostat Luxemburg: European Commission; [Available from: <http://ec.europa.eu/eurostat/web/health/health-status-determinants/data/database> accessed 04/02 2018.
40. Ellervik C, Kvetny J, Christensen KS, et al. Prevalence of depression, quality of life and antidepressant treatment in the Danish General Suburban Population Study. *Nord J Psychiatry* 2014 doi: 10.3109/08039488.2013.877074 [doi]
41. Clement S, Schauman O, Graham T, et al. What is the impact of mental health-related stigma on help-seeking? A systematic review of quantitative and qualitative studies. *Psychol Med* 2015;45(1):11-27.
42. Patten SB, Williams JV, Lavorato DH, et al. Perceived Stigma among Recipients of Mental Health Care in the General Canadian Population. *Canadian journal of psychiatry Revue canadienne de psychiatrie* 2016;61(8):480-8. doi: 10.1177/0706743716639928 [published Online First: 2016/06/17]

- 1  
2  
3  
4 43. Conner KO, Copeland VC, Grote NK, et al. Mental health treatment seeking among older adults with  
5 depression: the impact of stigma and race. *The American journal of geriatric psychiatry : official journal*  
6 *of the American Association for Geriatric Psychiatry* 2010;18(6):531-43. doi:  
7 10.1097/JGP.0b013e3181cc0366 [published Online First: 2010/03/12]  
8  
9 44. ten Have M, de Graaf R, Ormel J, et al. Are attitudes towards mental health help-seeking associated with  
10 service use? Results from the European Study of Epidemiology of Mental Disorders. *Soc Psychiatry*  
11 *Psychiatr Epidemiol* 2010;45(2):153-63.  
12 45. Sevilla-Dedieu C, Kovess-Masfety V, Gilbert F, et al. Mental health care and out-of-pocket expenditures in  
13 Europe: results from the ESEMeD project. *J Ment Health Policy Econ* 2011;14(2):95-105.  
14 46. Kiil A, Houlberg K. How does copayment for health care services affect demand, health and redistribution?  
15 A systematic review of the empirical evidence from 1990 to 2011. *Eur J Health Econ* 2014;15(8):813-28.  
16 47. Ahnquist J, Wamala SP. Economic hardships in adulthood and mental health in Sweden. The Swedish  
17 National Public Health Survey 2009. *BMC Public Health* 2011;11:788. doi: 10.1186/1471-2458-11-788  
18 48. Mood Disorders Society of Canada. Stigma and discrimination - as expressed by mental health  
19 professionals, 2007.  
20 49. Jorm AF, Korten AE, Jacomb PA, et al. "Mental health literacy": a survey of the public's ability to recognise  
21 mental disorders and their beliefs about the effectiveness of treatment. *The Medical journal of*  
22 *Australia* 1997;166(4):182-6. [published Online First: 1997/02/17]  
23 50. Dunn KI, Goldney RD, Grande ED, et al. Quantification and examination of depression-related mental health  
24 literacy. *Journal of evaluation in clinical practice* 2009;15(4):650-3. doi: 10.1111/j.1365-  
25 2753.2008.01067.x [published Online First: 2009/06/16]  
26 51. Jorm AF. Mental health literacy: empowering the community to take action for better mental health. *The*  
27 *American psychologist* 2012;67(3):231-43. doi: 10.1037/a0025957 [published Online First: 2011/11/02]  
28 52. Jensen KB, Morthorst BR, Vendsborg PB, et al. Effectiveness of Mental Health First Aid training in Denmark:  
29 a randomized trial in waitlist design. *Soc Psychiatry Psychiatr Epidemiol* 2016;51(4):597-606. doi:  
30 10.1007/s00127-016-1176-9 [published Online First: 2016/02/04]  
31 53. Koushede V. Act-Belong-Comit: National Institute of Public Health; 2018 [Available from: <http://www.sifolkesundhed.dk/Forskning/Befolkningens%20sundhedstilstand/Mental%20sundhed/ABC%20for%20mental%20sundhed.aspx?lang=en> accessed 04.04 2018].  
32  
33  
34  
35  
36  
37  
38  
39  
40  
41  
42  
43  
44  
45  
46  
47  
48  
49  
50  
51  
52  
53  
54  
55  
56  
57  
58  
59  
60

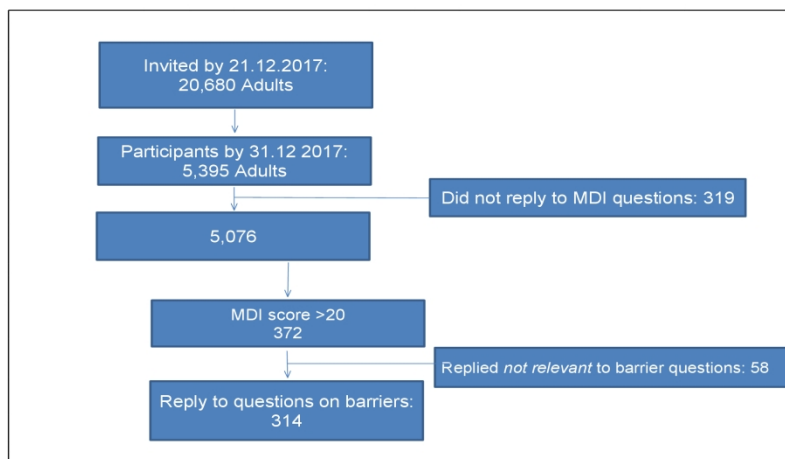

Figure 1. Sampling from the Lolland Falster Health Study

209x136mm (300 x 300 DPI)

1  
2  
3  
4  
5  
6  
7  
8  
9  
10  
11  
12  
13  
14  
15  
16  
17  
18  
19  
20  
21  
22  
23  
24  
25  
26  
27  
28  
29  
30  
31  
32  
33  
34  
35  
36  
37  
38  
39  
40  
41  
42  
43  
44  
45  
46  
47  
48  
49  
50  
51  
52  
53  
54  
55  
56  
57  
58  
59  
60

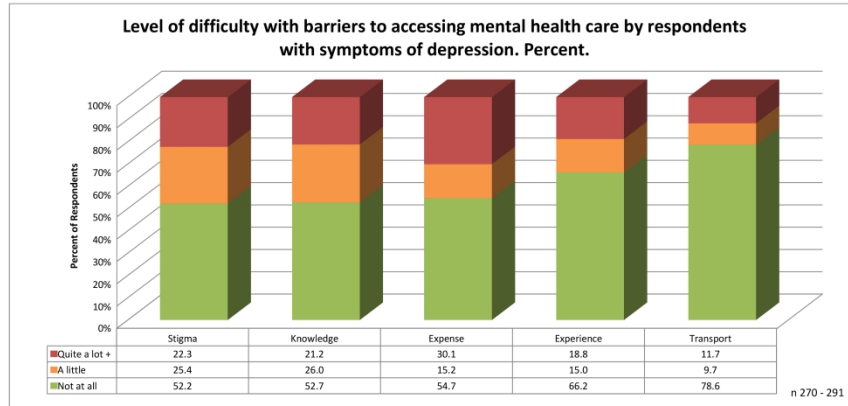

Figure 2. Responses on perceived barriers to accessing mental health care, proportions

331x175mm (300 x 300 DPI)

Socioeconomic position and perceived barriers to accessing mental health care by individuals with symptoms of depression: Results from the Lolland-Falster Health Study.

**Supplementary**

*Conceptual frame*

Patients’ choice of care will relate to personal preferences and abilities to access care. In a comprehensive theoretical approach by Levesque et al\* they combine several theories on access to health care and final treatment outcome. The model is patient-centered and based on service demand and service supply between which they describe the stepwise fulfilment of needs in the process from recognizing a health care need to a finalized treatment. The model has five central concepts associated with enforcing or inhibiting access on the supply-side, and five corresponding abilities on the demand-side, likewise with associated enforcing or inhibiting factors.

Figure 1: Model of a conceptual framework of access to health care\*

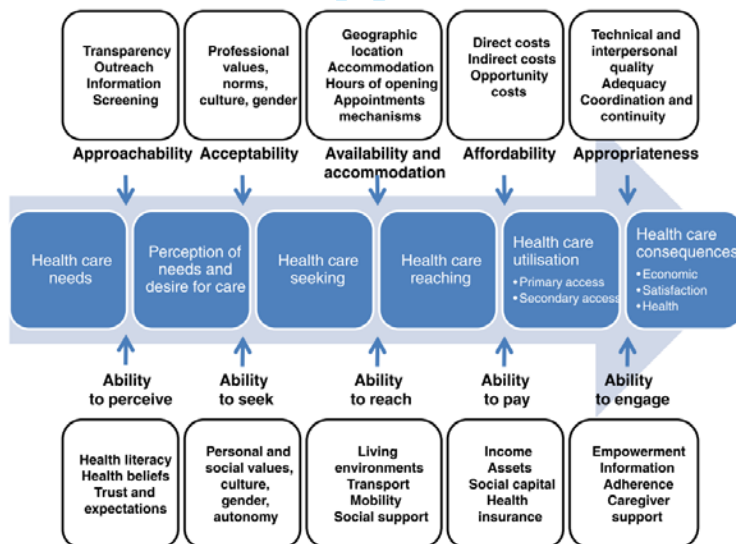

\* Levesque JF, Harris MF, Russell G. Patient-centred access to health care: conceptualising access at the interface of health systems and populations. *Int J Equity Health* 2013;12:18. doi: 10.1186/1475-9276-12-18.:18-12.



Socioeconomic position and perceived barriers to accessing mental health care by individuals with symptoms of depression:  
Results from the Lolland-Falster Health Study.

Table 1. Questionnaire

**Supplementary table: Condensation of the Barriers to Access to Care Evaluation scale (BACE v3)**

| Q no | BACE v3 Question                                                                                                           | Abilities # | Covered by question $\alpha$ |
|------|----------------------------------------------------------------------------------------------------------------------------|-------------|------------------------------|
| 1    | Being unsure where to go to get professional care                                                                          | Perceive    | 1                            |
| 2.   | Wanting to solve the problem on my own                                                                                     | Perceive    | (6)                          |
| 3.   | Concern that I might be seen as weak for having a mental health problem                                                    | Seek        | 2                            |
| 4.   | Fear of being put in hospital against my will                                                                              | Seek        | 2                            |
| 5.   | Concern that it might harm my chances when applying for jobs                                                               | Seek        | 2                            |
| 6.   | Problems with transport or travelling to appointments                                                                      | Reach       | 3                            |
| 7.   | Thinking the problem would get better by itself                                                                            | Perceive    |                              |
| 8.   | Concern about what my family might think or say                                                                            | Seek        | 2                            |
| 9.   | Feeling embarrassed or ashamed                                                                                             | Seek        | 2                            |
| 10.  | Preferring to get alternative forms of care (e.g. spiritual care, non-Western healing / medicine, complementary therapies) | Perceive    |                              |
| 11.  | Not being able to afford the financial costs involved                                                                      | Pay         | 4                            |
| 12.  | Concern that I might be seen as 'crazy'                                                                                    | Seek        | 2                            |
| 13.  | Thinking that professional care probably would not help                                                                    |             | (6)                          |
| 14.  | Concern that I might be seen as a bad parent                                                                               | Seek        | 2                            |
| 15.  | Professionals from my own ethnic or cultural group not being available                                                     |             |                              |
| 16.  | Being too unwell to ask for help                                                                                           |             |                              |
| 17.  | Concern that people I know might find out                                                                                  | Seek        | 2                            |
| 18.  | Dislike of talking about my feelings, emotions or thoughts                                                                 | Seek        |                              |
| 19.  | Concern that people might not take me seriously if they found out I was having professional care                           | Seek        | 2                            |
| 20.  | Concerns about the treatments available (e.g. medication side effects)                                                     | Perceive    |                              |
| 21.  | Not wanting a mental health problem to be on my medical records                                                            | Seek        | 2                            |
| 22.  | Having had previous bad experiences with professional care for mental health                                               | Engage      | 5                            |
| 23.  | Preferring to get help from family or friends                                                                              | Seek        |                              |
| 24.  | Concern that my children may be taken into care or that I may lose access or custody without my agreement                  | Seek        | 2                            |
| 25.  | Thinking I did not have a problem                                                                                          | Perceive    | 6                            |
| 26.  | Concern about what my friends might think or say                                                                           | Seek        | 2                            |
| 27.  | Difficulty taking time off work                                                                                            | Reach       |                              |
| 28.  | Concern about what people at work might think, say or do                                                                   | Seek        | 2                            |
| 29.  | Having problems with childcare while I receive professional care                                                           | Reach       | 3                            |
| 30.  | Having no one who could help me get professional care                                                                      | Reach       |                              |

Clement et al. *BMC Psychiatry* 2012, 12:36

*Development and psychometric properties the Development and psychometric properties the Barriers to Access to Care Evaluation scale (BACE) - related to people with mental ill health*

# According to model of Levesque et al. *International Journal for Equity in Health* 2013, 12:18

Patient-centered access to health care: conceptualizing access at the interface of health systems and populations

$\alpha$  The questions in the questionnaire of the present study

Socioeconomic position and perceived barriers to accessing mental health care by individuals with symptoms of depression: Results from the Lolland-Falster Health Study.

**Suppl. Table 2: Perceived barriers accessing MHC & symptoms of depression, crude numbers**

| <b>Stigma</b>     | <b>Mild</b> | <b>Mod.</b> | <b>Severe</b> | <b>Sum</b> | <b>Pct (resp)</b> |
|-------------------|-------------|-------------|---------------|------------|-------------------|
| Not at all        | 73          | 50          | 29            | 152        | 52,2              |
| A little          | 39          | 20          | 15            | 74         | 25,4              |
| Quite a lot       | 16          | 13          | 10            | 39         | 13,4              |
| A lot             | 10          | 6           | 10            | 26         | 8,9               |
| NA                | 11          | 6           | 6             | 23         |                   |
| <b>Sum</b>        | <b>149</b>  | <b>95</b>   | <b>70</b>     | <b>314</b> | <b>291</b>        |
| <b>Knowledge</b>  | <b>Mild</b> | <b>Mod.</b> | <b>Severe</b> | <b>Sum</b> | <b>Pct (resp)</b> |
| Not at all        | 77          | 50          | 27            | 154        | 52,7              |
| A little          | 41          | 21          | 14            | 76         | 26,0              |
| Quite a lot       | 20          | 13          | 16            | 49         | 16,8              |
| A lot             | 2           | 4           | 7             | 13         | 4,5               |
| NA                | 9           | 7           | 6             | 22         |                   |
| <b>Sum</b>        | <b>149</b>  | <b>95</b>   | <b>70</b>     | <b>314</b> | <b>292</b>        |
| <b>Expense</b>    | <b>Mild</b> | <b>Mod.</b> | <b>Severe</b> | <b>Sum</b> | <b>Pct (resp)</b> |
| Not at all        | 84          | 47          | 27            | 158        | 54,7              |
| A little          | 20          | 14          | 10            | 44         | 15,2              |
| Quite a lot       | 15          | 14          | 15            | 44         | 15,2              |
| A lot             | 18          | 13          | 12            | 43         | 14,9              |
| NA                | 12          | 7           | 6             | 25         |                   |
| <b>Sum</b>        | <b>149</b>  | <b>95</b>   | <b>70</b>     | <b>314</b> | <b>289</b>        |
| <b>Experience</b> | <b>Mild</b> | <b>Mod.</b> | <b>Severe</b> | <b>Sum</b> | <b>Pct (resp)</b> |
| Not at all        | 98          | 58          | 34            | 190        | 66,2              |
| A little          | 22          | 11          | 10            | 43         | 15,0              |
| Quite a lot       | 15          | 9           | 8             | 32         | 11,1              |
| A lot             | 4           | 10          | 8             | 22         | 7,7               |
| NA                | 10          | 7           | 10            | 27         |                   |
| <b>Sum</b>        | <b>149</b>  | <b>95</b>   | <b>70</b>     | <b>314</b> | <b>287</b>        |
| <b>Transport</b>  | <b>Mild</b> | <b>Mod.</b> | <b>Severe</b> | <b>Sum</b> | <b>Pct (resp)</b> |
| Not at all        | 117         | 66          | 45            | 228        | 78,6              |
| A little          | 10          | 11          | 7             | 28         | 9,7               |
| Quite a lot       | 6           | 4           | 9             | 19         | 6,6               |
| A lot             | 6           | 6           | 3             | 15         | 5,2               |
| NA                | 10          | 8           | 6             | 24         |                   |
| <b>Sum</b>        | <b>149</b>  | <b>95</b>   | <b>70</b>     | <b>314</b> | <b>290</b>        |

**Suppl. Table 3. Adjusted odds ratios for five perceived barriers accessing mental health care by severity of symptoms of depression**

| Dep. Grade | Stigma |             |     | Knowledge |              |     | Expense      |                    |     | Experience |             |     | Transport    |                    |     |
|------------|--------|-------------|-----|-----------|--------------|-----|--------------|--------------------|-----|------------|-------------|-----|--------------|--------------------|-----|
|            | aOR    | CI          | n   | aOR       | CI           | n   | aOR          | CI                 | n   | aOR        | CI          | n   | aOR          | CI                 | n   |
| Mild       | 1      |             | 291 | 1         |              | 292 | 1            |                    | 289 | 1          |             | 287 | 1            |                    | 290 |
| Moderate   | .8463  | .4903 1.461 |     | .9464     | .5510 16.256 |     | 1.350        | .7722 2.359        |     | 1.220      | .6854 2.172 |     | 1.684        | .8614 3.294        |     |
| Severe     | 1.259  | .6867 2.309 |     | 1.723     | .9420 3.151  |     | <b>2.043</b> | <b>1.097 3.804</b> |     | 1.739      | .9220 3.279 |     | <b>2.225</b> | <b>1.098 4.512</b> |     |
| MDI score# | 1.005  | .9628 1.050 |     | 1.030     | .9864 10.750 |     | <b>1.063</b> | <b>1.016 1.112</b> |     | 1.035      | .9891 1.083 |     | <b>1.076</b> | <b>1.024 1.130</b> |     |

Adjusted for: gender; age +/- 60; 95% confidence intervals (CI), marked bold  
 # Major Depression Inventory scale > 20 ≤ 50, ungrouped

STROBE Statement for the study: **Socioeconomic position and perceived barriers to access mental health care by individuals with symptoms of depression. Results from the Lolland-Falster Health Study.**

|                              | Item No | Recommendation                                                                                                                                                                                    | Addressed on page:                     |
|------------------------------|---------|---------------------------------------------------------------------------------------------------------------------------------------------------------------------------------------------------|----------------------------------------|
| <b>Title and abstract</b>    | 1       | (a) Indicate the study's design with a commonly used term in the title or the abstract                                                                                                            | 4                                      |
|                              |         | (b) Provide in the abstract an informative and balanced summary of what was done and what was found                                                                                               | 2                                      |
| <b>Introduction</b>          |         |                                                                                                                                                                                                   |                                        |
| Background/rationale         | 2       | Explain the scientific background and rationale for the investigation being reported                                                                                                              | 3                                      |
| Objectives                   | 3       | State specific objectives, including any prespecified hypotheses                                                                                                                                  | 4                                      |
| <b>Methods</b>               |         |                                                                                                                                                                                                   |                                        |
| Study design                 | 4       | Present key elements of study design early in the paper                                                                                                                                           | 4                                      |
| Setting                      | 5       | Describe the setting, locations, and relevant dates, including periods of recruitment, exposure, follow-up, and data collection                                                                   | 5                                      |
| Participants                 | 6       | (a) Give the eligibility criteria, and the sources and methods of selection of participants. Describe methods of follow-up                                                                        | 5                                      |
|                              |         | (b) For matched studies, give matching criteria and number of exposed and unexposed                                                                                                               |                                        |
| Variables                    | 7       | Clearly define all outcomes, exposures, predictors, potential confounders, and effect modifiers. Give diagnostic criteria, if applicable                                                          | 5 - 6<br>Table 1                       |
| Data sources/<br>measurement | 8*      | For each variable of interest, give sources of data and details of methods of assessment (measurement). Describe comparability of assessment methods if there is more than one group              | 5 - 6<br><i>Supplement<br/>Table 1</i> |
| Bias                         | 9       | Describe any efforts to address potential sources of bias                                                                                                                                         |                                        |
| Study size                   | 10      | Explain how the study size was arrived at                                                                                                                                                         | 7 & Figure 1                           |
| Quantitative variables       | 11      | Explain how quantitative variables were handled in the analyses. If applicable, describe which groupings were chosen and why                                                                      | 5 - 6                                  |
| Statistical methods          | 12      | (a) Describe all statistical methods, including those used to control for confounding                                                                                                             | 7                                      |
|                              |         | (b) Describe any methods used to examine subgroups and interactions                                                                                                                               |                                        |
|                              |         | (c) Explain how missing data were addressed                                                                                                                                                       |                                        |
|                              |         | (d) If applicable, explain how loss to follow-up was addressed                                                                                                                                    |                                        |
|                              |         | (e) Describe any sensitivity analyses                                                                                                                                                             |                                        |
| <b>Results</b>               |         |                                                                                                                                                                                                   |                                        |
| Participants                 | 13*     | (a) Report numbers of individuals at each stage of study—eg numbers potentially eligible, examined for eligibility, confirmed eligible, included in the study, completing follow-up, and analysed | 7                                      |
|                              |         | (b) Give reasons for non-participation at each stage                                                                                                                                              |                                        |
|                              |         | (c) Consider use of a flow diagram                                                                                                                                                                | Figure 1                               |
| Descriptive data             | 14*     | (a) Give characteristics of study participants (eg demographic, clinical, social) and information on exposures and potential confounders                                                          | Table 1                                |
|                              |         | (b) Indicate number of participants with missing data for each variable of interest                                                                                                               | Supplement<br>table 2                  |
|                              |         | (c) Summarise follow-up time (eg, average and total amount)                                                                                                                                       |                                        |
| Outcome data                 | 15*     | Report numbers of outcome events or summary measures over time                                                                                                                                    |                                        |

|    |                          |    |                                                                                                                                                                                                              |                        |
|----|--------------------------|----|--------------------------------------------------------------------------------------------------------------------------------------------------------------------------------------------------------------|------------------------|
| 1  | Main results             | 16 | (a) Give unadjusted estimates and, if applicable, confounder-adjusted estimates and their precision (eg, 95% confidence interval). Make clear which confounders were adjusted for and why they were included | Table 3<br>Table 4 + 5 |
| 2  |                          |    | (b) Report category boundaries when continuous variables were categorized                                                                                                                                    | 5                      |
| 3  |                          |    | (c) If relevant, consider translating estimates of relative risk into absolute risk for a meaningful time period                                                                                             |                        |
| 4  | Other analyses           | 17 | Report other analyses done—eg analyses of subgroups and interactions, and sensitivity analyses                                                                                                               |                        |
| 5  | <b>Discussion</b>        |    |                                                                                                                                                                                                              |                        |
| 6  | Key results              | 18 | Summarise key results with reference to study objectives                                                                                                                                                     | 10                     |
| 7  | Limitations              | 19 | Discuss limitations of the study, taking into account sources of potential bias or imprecision. Discuss both direction and magnitude of any potential bias                                                   | 10-11                  |
| 8  | Interpretation           | 20 | Give a cautious overall interpretation of results considering objectives, limitations, multiplicity of analyses, results from similar studies, and other relevant evidence                                   | 11-12                  |
| 9  | Generalisability         | 21 | Discuss the generalisability (external validity) of the study results                                                                                                                                        | 11                     |
| 10 | <b>Other information</b> |    |                                                                                                                                                                                                              |                        |
| 11 | Funding                  | 22 | Give the source of funding and the role of the funders for the present study and, if applicable, for the original study on which the present article is based                                                | 1 & 5                  |

\*Give information separately for exposed and unexposed groups.

**Note:** An Explanation and Elaboration article discusses each checklist item and gives methodological background and published examples of transparent reporting. The STROBE checklist is best used in conjunction with this article (freely available on the Web sites of PLoS Medicine at <http://www.plosmedicine.org/>, Annals of Internal Medicine at <http://www.annals.org/>, and Epidemiology at <http://www.epidem.com/>). Information on the STROBE Initiative is available at <http://www.strobe-statement.org>.

# BMJ Open

**Are perceived barriers to accessing mental health care associated with socioeconomic position among individuals with symptoms of depression? Questionnaire-results from the Lolland-Falster Health Study.**

|                                 |                                                                                                                                                                                                                                                                                                                                                                                                                                                                                                                            |
|---------------------------------|----------------------------------------------------------------------------------------------------------------------------------------------------------------------------------------------------------------------------------------------------------------------------------------------------------------------------------------------------------------------------------------------------------------------------------------------------------------------------------------------------------------------------|
| Journal:                        | <i>BMJ Open</i>                                                                                                                                                                                                                                                                                                                                                                                                                                                                                                            |
| Manuscript ID                   | bmjopen-2018-023844.R2                                                                                                                                                                                                                                                                                                                                                                                                                                                                                                     |
| Article Type:                   | Research                                                                                                                                                                                                                                                                                                                                                                                                                                                                                                                   |
| Date Submitted by the Author:   | 12-Dec-2018                                                                                                                                                                                                                                                                                                                                                                                                                                                                                                                |
| Complete List of Authors:       | Packness, Aake; Syddansk Universitet Det Sundhedsvidenskabelige Fakultet, Research Unit for General Practice, Department of Public Health; Psykiatrien i Region Sjælland, Psychiatric Research Unit Halling, Anders; Lund University, Clinical sciences Malmo, CRC Simonsen, Erik; University of Copenhagen, Department of Clinical Medicine<br>Waldorff, Frans; University of Southern Denmark, Research Unit for General Practice, Health Science Department<br>Hastrup, Lene; Psychiatric Research Unit, Region Zealand |
| <b>Primary Subject Heading</b>: | Mental health                                                                                                                                                                                                                                                                                                                                                                                                                                                                                                              |
| Secondary Subject Heading:      | Public health, Health services research                                                                                                                                                                                                                                                                                                                                                                                                                                                                                    |
| Keywords:                       | Depression & mood disorders < PSYCHIATRY, MENTAL HEALTH, Organisation of health services < HEALTH SERVICES ADMINISTRATION & MANAGEMENT, PRIMARY CARE, PUBLIC HEALTH                                                                                                                                                                                                                                                                                                                                                        |
|                                 |                                                                                                                                                                                                                                                                                                                                                                                                                                                                                                                            |

SCHOLARONE™  
Manuscripts

1  
2  
3  
4 **Are perceived barriers to accessing mental health care associated with socioeconomic**  
5 **position among individuals with symptoms of depression? Questionnaire-results from the**  
6 **Lolland-Falster Health Study.**  
7  
8

9 A Packness, A Halling, E Simonsen, FB Waldorff, LH Hastrup

10  
11  
12 Department of Public Health, University of Southern Denmark, DK-5000 Odense, Denmark. Aake Packness,  
13 MPH, Research Unit for General Practice, University of Southern Denmark. Anders Halling, professor, Center for  
14 Primary Health Care Research, Institute of Clinical Sciences, Malmö, Lund University, SE-20213, Sweden.; Erik  
15 Simonsen, professor, Department of Clinical Medicine, University of Copenhagen, Psychiatric Research Unit,  
16 Region of Zealand, Denmark; Frans B Waldorff, professor, Department of Public Health, University of Southern  
17 Denmark, DK-5000 Odense, Denmark. Lene H Hastrup, senior researcher, Psychiatric Research Unit, Region of  
18 Zealand, DK-4200 Slagelse, Denmark.  
19

20  
21 Correspondence to: A Packness [apackness@health.sdu.dk](mailto:apackness@health.sdu.dk)  
22 ORCID-0000-0002-4695-6214  
23

24 Research Unit of General Practice, Institute of Public Health, J.B. Winsløvs Vej 9A, DK-5000 Odense C,  
25 Denmark. Telephone: +45 20537264  
26  
27

28  
29 Word count 4,670 (excl. tables)/ 5,386 (incl. tables)  
30

31 The Corresponding Author has the right to grant on behalf of all authors and does grant on behalf of all  
32 authors, an exclusive licence on a worldwide basis to the BMJ Publishing Group Ltd to permit this article (if  
33 accepted) to be published in BMJ editions and any other BMJPG products and sub-licences such use and  
34 exploit all subsidiary rights, as set out in our licence.  
35

36  
37 **Competing interest statement**  
38

39 All authors have completed the Unified Competing Interest form (available on request from the corresponding  
40 author) and declare: no support from any organisation for the submitted, no financial relationships with any  
41 organisations that might have an interest in the submitted work in the previous three years, and no other  
42 relationships or activities that could appear to have influenced the submitted work.  
43

44  
45 Funding: The study has been supported by an unrestricted grant (No 15-000342) from the Health Research  
46 Foundation of Region Zealand.  
47

48 **Transparency declaration**

49 Aake Packness affirms that this manuscript is an honest, accurate, and transparent account of the study being  
50 reported, that no important aspects of the study have been omitted, and that any discrepancies from the study  
51 as planned have been explained.  
52  
53  
54  
55  
56  
57  
58  
59  
60

## Abstract

**Objective:** To evaluate if perceived barriers to accessing mental health care (MHC) among individuals with symptoms of depression are associated with their socioeconomic position (SEP).

**Design:** Cross-sectional questionnaire-based population survey from the Lolland-Falster Health Study (LOFUS) 2016-17 including 5,076 participants.

**Participants:** The study included 372 individuals participating in LOFUS with positive scores for depression according to the Major Depression Inventory (MDI).

**Interventions:** A set of five questions on perceived barriers to accessing professional care for a mental health problem was prompted to individuals responding with symptoms of depression (MDI score >20).

**Outcomes:** The association between SEP (as measured by educational attainment, employment status, and financial strain) and five different types of barriers to accessing MHC were analysed in separate multivariable logistic regression models adjusted for gender and age.

**Results:** 314 out of 372 (84%) completed the survey questions and reported experiencing barriers to MHC access. Worry about expenses related to seeking or continuing MHC was a considerable barrier for 30% of the individuals responding, and as such the greatest problem among the five types of barriers. 22% perceived stigma as a barrier to accessing MHC, but there was no association between perceived stigma and SEP. Transportation was the barrier of least concern for individuals in general, but also the issue with greatest and most consistent socioeconomic disparity (odds ratio (OR) 2.99; confidence interval (CI) 1.19 – 7.52) for lowest vs highest educational groups, and likewise concerning expenses (OR 2.77, CI 1.34 – 5.76) for the same groups.

**Conclusion:** Issues associated with *Expenses* and *Transport* were more frequently perceived as barriers to accessing MHC for people in low SEP compared to people in high SEP. Stigma showed no association to SEP.

Informed written consent was obtained. Region Zealand's Ethical Committee on Health Research (SJ-421) and the Danish Data Protection Agency (REG-24-2015) approved the study.

### Strengths and limitations of this study:

- A strength of this study is that it is a population study in a socioeconomically-deprived area and combines data on present depression scores and SEP with proportions of perceived barriers to accessing mental health care services; thus, the study can shed light on factors that deter individuals with symptoms of depression from seeking MHC services.
- The questions used to assess barriers to accessing mental health care are not standardized, although they were validated for content and do have external validity.
- There was a potential overlap in the questions, between transportation barriers and barriers of expenses related to seeking or continuing mental health care services. Thus it was not clear whether "expenses" included "transport expenses" and whether transport was a logistical or economical barrier.

## Introduction

Major depressive disorders (MDD) rank third among leading causes of years lived with disability (YLD) in high-income countries, as MDD is common and has an early onset.<sup>1</sup> Mental health problems in early age can have a profound impact on educational achievements<sup>2</sup>, on income<sup>3</sup>, and on later unemployment<sup>4</sup>. Additionally, having a diagnosis of depression is associated with a substantially shorter life expectancy<sup>5</sup>.

In spite of this, far from all people suffering from depression are treated. In a Norwegian survey study only 12% of respondents with symptoms of depression had ever sought help<sup>6</sup>, and a Canadian study found that 40% with symptoms of depression or anxiety perceived an unmet need for care<sup>7</sup>. Generally, treatment of patients suffering from depression is insufficient even in high-income countries, as only one in five receives adequate treatment<sup>8</sup>.

Depressive disorders are closely associated with socioeconomic position (SEP). A dose response relationship has been found between income as well as education on incidence, prevalence, and persistence of depression<sup>9</sup>. Likewise, studies have found negative socioeconomic changes increase the risk of incidents of mental disorders, particularly of mood disorders<sup>10</sup>, and financial strain in itself is associated with depressive disorder<sup>11</sup><sup>12</sup>.

Thus, people in low SEP may have a higher need for mental health care due to increased incidence and prevalence of depression. A recent study found predictors of need for highly-specialized MDD care to be: depression severity, younger age at onset, prior poor treatment response, psychiatric comorbidity, somatic comorbidity, childhood trauma, psychosocial impairment, older age, and a socioeconomically disadvantaged status<sup>13</sup>. Although people in low SEP have an increased need for mental health services, it is not evident that they use more specialized care. Some studies have found access to specialist care to be based on clinical need, with little inequity in SEP<sup>14</sup><sup>15</sup><sup>16</sup>, whereas others report specialized mental health services as psychologist or psychiatrists are not provided equally to persons in low SEP according to need<sup>17</sup><sup>18</sup><sup>7</sup><sup>19</sup> or that higher SEP is associated with more usage of specialized mental health services<sup>20</sup><sup>21</sup>.

The background for initiating the present study was that health care statistics (unpublished) in 2013 revealed a significant disparity, as 20% fewer individuals in the most socioeconomically deprived municipality in Denmark (Lolland) had been in contact with out-patient mental health care (psychologist, private, or public psychiatry) than could be expected for the population size (unpublished). Several reasons may account for this discrepancy between expected higher need in a deprived area and actual use of mental health care services, one of them being perceptions of barriers that affect patients' choices or preferences, which we aimed to address in this study.



1  
2  
3  
4 The study objective was to evaluate if perceived barriers to accessing mental health care differ across  
5 individuals with symptoms of depression according to SEP. We thereby expected to gain knowledge valuable to  
6 addressing inequality in the use of mental health care services.  
7

## 8 **Method**

### 9 *Study design*

10 The study was conducted as a cross-sectional questionnaire-based population survey.  
11  
12

### 13 *Setting*

14 The Danish health care system is tax-funded and free at delivery for both primary and secondary care; for  
15 adults, dental care and psychotherapy are only partly subsidized<sup>22</sup>. The general practitioner (GP) fulfills a  
16 gatekeeper function, as specialized care is only free after GP referral. Psychotherapy by a psychologist is partly  
17 subsidized only for patients referred by a GP for specific conditions: reaction to specific traumatic events;  
18 moderate depression; and, specifically for citizens between 18 and 38 years old, moderate anxiety disorders. In  
19 2014, the out of pocket cost to individuals partly subsidised at time of service was equivalent to 52€ for the  
20 first consultation and 44€ for the following sessions<sup>23</sup>.  
21  
22  
23

### 24 *Study population and data sources*

25 The Lolland-Falster Health Study (LOFUS) is a publicly funded population survey conducted in the two remote  
26 municipalities of Lolland and Guldborgsund, located in a socioeconomically deprived area of Denmark that is a  
27 1½-2 hours' drive south from the capital Copenhagen. In the 2017 national ranking of all 98 municipalities  
28 these two were ranked the most deprived and the 8<sup>th</sup> most deprived municipalities<sup>24</sup>. Together, the  
29 municipalities comprise 103,000 citizens, 50% being 50 years of age or older<sup>25</sup> in 2017. The study aims to enroll  
30 25,000 participants of all ages and is conducted from 2016 to 2020. Participants are randomly selected by civil  
31 registration numbers<sup>26</sup>, invited by mail, and re-invited by phone. The study covers several health areas: mental  
32 health, health literacy, social issues, genetics, kidney, ear nose & throat problems, and more. Beyond  
33 questionnaire responses, LOFUS data contains blood samples and biometrics. The study is described in detail  
34 elsewhere. The present study relies on responses to the questionnaire from adults, with data drawn from  
35 LOFUS at the end of 2017, while data collection was still ongoing.  
36  
37  
38  
39  
40

41 The subjects included in this study are respondents with symptoms of depression. All respondents who scored  
42 >20 on the Major Depression Inventory (MDI) were prompted the specific questions on perceived barriers to  
43 seeking help for mental health problems, which are described below.  
44

### 45 *Independent variables*

#### 46 *Major Depression Inventory*

47 As part of the LOFUS questionnaire, the respondents filled out the Major Depression Inventory (MDI). The MDI  
48 is based on the 12-item Likert scale and has been found to have an adequate internal and external validity for  
49 defining different stages of depression<sup>27</sup>. The MDI is based on the ICD-10 diagnostic criteria for depressive  
50 disorder<sup>28</sup>, with scores ranging from 0 to 50. We used the sum score after excluding the lowest score on  
51 question 8 or 9 and likewise the lowest score on item 11 or 12, which measured increased/decreased  
52 restlessness and increased/decreased appetite, respectively<sup>29</sup>. Mild depression is covered by scores from 21 –  
53  
54  
55  
56  
57  
58  
59  
60

1  
2  
3  
4 25, moderate depression from 26 – 30 and severe depression by scores from 31 – 50<sup>30</sup>. If more than two items  
5 were missing in the MDI, the score was categorized as missing<sup>31</sup>.  
6  
7

### 8 *Socioeconomic position*

9 SEP was measured by employment status, educational attainment, and financial strain. Usually income status  
10 is included as measure of SEP but information on income was not an item in the questionnaire. Financial strain  
11 is not the optimal measurement of SEP; however, it has been found to be associated with having a depressive  
12 and/or anxiety disorder, above the effect of income, and to be negatively but not strongly correlated with  
13 income ( $r=-0.41$ ,  $p<0.001$ )<sup>11</sup>.  
14  
15

16  
17 Employment status was gathered using 14 different items in the questionnaire. Respondents over the age of 67  
18 were categorized as retired, unless they were employed. The categories of employment were reduced to four  
19 in the analyses: Working (employee; self-employed; combined employee and self-employed; military;  
20 secondary school pupil; postsecondary student; apprentice; house-wife/husband); Temporary not working  
21 (unemployed; rehabilitation; sickness leave 3 months or more); Retired (retired due to age; disability benefit;  
22 early retirement); and Other (Other).  
23  
24

25 Educational attainment was measured and classified as the following: *no postsecondary education* if the  
26 respondent did not complete any postsecondary education; *1-3 years postsecondary education* for vocational  
27 or academy/professional graduates of 1 - 3 years; *3+ postsecondary education* for baccalaureate matriculants  
28 who completed 3 - 4 years; and *academic* for those who completed graduate study of  $\geq 5$  years.  
29  
30

31 The questionnaire gathered responses concerning financial strain with the following question: *How often*  
32 *within the last 12 months have you had problems paying your bills?* With possible answers: *Never; Few months;*  
33 *Approximately half the months in the year; Every month.* In the analysis, the categories were reduced to three  
34 to gain power, merging *Approximately half the months in the year* and *Every month* into one category.  
35  
36

### 37 **Extrinsic variables:**

38 Sociodemographic variables included were gender, age, marital status, and cohabitation.  
39  
40

41 Questions on *Self-perceived general health* (SRH) were provided to respondents with a five-point Likert scale  
42 from *very good* to *very bad*. In addition, the presence of a *Long-standing health problem* was posed as a binary  
43 question and *General activity limitation* was gauged in three grades from *severely limited* to *not at all*. These  
44 questions were adopted from the European Health Status Module<sup>32</sup>.  
45  
46

47 The questionnaire included inquiries regarding past and present medical problems; specifically concerning  
48 mental health status, the respondents were asked if they presently suffered or had ever suffered from anxiety  
49 disorder and/or depression.  
50

### 51 **Dependent variables**

52 We developed a short list of questions to be included in the LOFUS questionnaire for respondents who scored  
53 positive for symptoms of depression. The questions were inspired by the *Barriers to Access to Care Evaluation*  
54  
55  
56  
57  
58  
59

questionnaire by Sara Clement et al.<sup>33</sup>. Their questionnaire contains 30 items, which was too many to include in the LOFUS study (see supplementary table 1). The number of questions was reduced and grouped to cover the individual abilities in approaching care as described by Levesque et al.<sup>34</sup>: ability to perceive; ability to seek; ability to reach; ability to pay; and ability to engage (see further description in the supplementary material, Figure 1). A preliminary question on whether considering seeking care had ever been a problem was prompted before the five questions related to the abilities/perceived barriers:

*Have any of the reasons listed below prevented, delayed, or discouraged you from getting or continuing professional care for a mental health problem?*

*It has had an impact, that I ..*

- 1) ... have been unsure what to do to get professional care. (termed "Knowledge" in the following)
- 2) ... have been concerned for what others might think, say or do. (termed "Stigma")
- 3) ... have had difficulty with transport or travelling for treatment. (termed "Transport")
- 4) ... have not been able to afford the expenses that followed. (termed "Expense")
- 5) ... have had bad experiences with professional care for mental health problems. (termed "Experience")
- 6) These questions are not relevant for me/I do not want to answer.

Answers to question 1 – 5 were listed in four grades ranging from *Not at all* to *Quite a lot*; question 6 was binary.

In a preliminary form, the questions were evaluated for content validity in a focus group interview consisting of a group of ten patients and relatives of psychiatric patients (the Panel of Relatives and Patients of Psychiatry Services in Region Zealand) in December 2014. The group found the themes relevant and the questions understandable. They offered some suggestions for rephrasing, which were subsequently followed. The same panel commented on the preliminary results of the study in December 2017.

### **Statistical analysis**

For respondents with symptoms of depression we estimated the association between SEP and the outcome variables (five types of barriers to MHC: knowledge; stigma; transport; expense; experience) in separate multivariable logistic regression models after excluding respondents replying *Not relevant*. Likewise, we performed the same analyses with the three grades of depression (mild, moderate and severe) and depression score uncategorized (MDI score) as independent variables, which is presented as supplementary material. The SEP categories were employment status, education, and financial strain. *Working, postsecondary education, and no economic distress* were used as reference categories.

The logistic regression models were adjusted for age (18-59 versus 60+) and gender in addition to the variables studied in the univariate (crude) analysis.

The significance level used was 5% throughout, and all reported confidence intervals were 95%. All statistical analyses were done in Stata 15<sup>35</sup>.

### ***Patient and Public Involvement***

The study objectives were discussed with the members of the Panel of Relatives and Patients of Psychiatry Services in Region Zealand along with the validation of the questions in December 2014. The preliminary results were discussed with the group again in December 2017. The final results were distributed to the group in February 2018 along with an invitation for additional comments. One member of the patient panel responded to the invitation and provided additional comments/discussion. Comments from patients are included in the discussion.

The published article will also be distributed to the patient panel.

### **Ethics**

Informed, written consent was obtained from all participants. The study – along with the Lolland-Falster Health Study – was approved by Region Zealand's Ethical Committee on Health Research (SJ-421) and the Danish Data Protection Agency (REG-24-2015).

### **Results**

Figure 1: Flow chart of sampling

#### *Sampling from Lolland-Falster Health Study*

By December 21, 2017, a total of 20,680 adults (age 18+) had been invited to the LOFUS study. By December 31, 2017, a total of 5,395 adults had replied to the questionnaire. 319 did not reply on the MDI score element or failed to fill in more than two answers in the test, leaving 5,076, of whom 372 (7.3%) reported symptoms of depression and thus were prompted the questions on perceived barriers to seeking mental health care. 58 replied that the questions were not relevant or would not answer them, thus 314 individuals with a MDI score >20 were included in the analyses of SEP and perceived barriers.

Table 1. Characteristics of study sample and respondents with symptoms of depression

| Table 1. Characteristics of study sample and respondents with symptoms of depression (MDI >20) |              |             |             |      |               |            |
|------------------------------------------------------------------------------------------------|--------------|-------------|-------------|------|---------------|------------|
| Age group                                                                                      | Total sample |             |             |      | MDI score >20 |            |
|                                                                                                | Male         | Female      | Total       | %    | N             | %          |
| 18-29                                                                                          | 198          | 212         | 410         | 8.1  | 55            | 13.4       |
| 30-39                                                                                          | 180          | 250         | 430         | 8.5  | 41            | 9.5        |
| 40-49                                                                                          | 357          | 443         | 800         | 15.8 | 82            | 10.3       |
| 50-59                                                                                          | 519          | 681         | 1200        | 23.6 | 84            | 7.0        |
| 60-69                                                                                          | 632          | 666         | 1298        | 25.6 | 63            | 4.9        |
| 70-79                                                                                          | 396          | 371         | 767         | 15.1 | 41            | 5.3        |
| 80+                                                                                            | 95           | 76          | 171         | 3.4  | 6             | 3.5        |
| <b>Sum</b>                                                                                     | <b>2377</b>  | <b>2699</b> | <b>5076</b> |      | <b>372</b>    | <b>7.3</b> |
| <b>Marital status</b>                                                                          |              |             |             |      |               |            |
| Married                                                                                        | 1538         | 1708        | 3246        | 64.5 | 181           | 5.6        |
| Partnership                                                                                    | 73           | 108         | 181         | 3.6  | 15            | 8.3        |
| Separated                                                                                      | 12           | 9           | 21          | 0.4  | 5             | 23.8       |
| Divorced                                                                                       | 169          | 195         | 364         | 7.2  | 31            | 8.5        |
| Widower                                                                                        | 59           | 164         | 223         | 4.4  | 11            | 4.9        |
| Not married                                                                                    | 509          | 487         | 996         | 19.8 | 122           | 12.2       |
| <b>Cohabiting</b>                                                                              |              |             |             |      |               |            |
| Yes                                                                                            | 1917         | 2141        | 4058        | 80.7 | 248           | 6.1        |
| <b>Secondary schooling</b>                                                                     |              |             |             |      |               |            |
| Studying                                                                                       | 20           | 34          | 54          | 1.1  | 5             | 9.3        |
| < 8 years                                                                                      | 290          | 203         | 493         | 9.7  | 35            | 7.1        |
| 8 - 9 years                                                                                    | 610          | 401         | 1011        | 19.9 | 87            | 8.6        |
| 10 - 11 years                                                                                  | 751          | 913         | 1664        | 32.8 | 112           | 6.7        |
| High school                                                                                    | 522          | 896         | 1418        | 27.9 | 89            | 6.3        |
| Other/foreign                                                                                  | 163          | 215         | 378         | 7.4  | 38            | 10.1       |
| <b>Postsecondary education</b>                                                                 |              |             |             |      |               |            |
| No postsecondary                                                                               | 415          | 529         | 944         | 18.6 | 112           | 11.9       |
| 1-3 years postsecondary                                                                        | 1307         | 1238        | 2545        | 50.1 | 172           | 6.8        |
| 3+ years postsecondary                                                                         | 495          | 784         | 1279        | 25.2 | 63            | 4.9        |
| Other                                                                                          | 143          | 122         | 265         | 5.2  | 21            | 7.9        |
| <b>Occupational status</b>                                                                     |              |             |             |      |               |            |
| Work/study                                                                                     | 1417         | 1526        | 2943        | 58.0 | 167           | 5.7        |
| Temp. No work                                                                                  | 68           | 121         | 189         | 3.7  | 63            | 33.3       |
| Retired                                                                                        | 843          | 966         | 1809        | 35.6 | 115           | 6.4        |
| Other                                                                                          | 47           | 77          | 124         | 2.4  | 27            | 21.8       |
| <b>Financial strain</b>                                                                        |              |             |             |      |               |            |
| Not at all                                                                                     | 2136         | 2404        | 4540        | 89.4 | 275           | 6.1        |
| Few months                                                                                     | 175          | 213         | 388         | 7.6  | 60            | 15.5       |
| Half the months                                                                                | 23           | 22          | 45          | 0.9  | 13            | 28.9       |
| Every month                                                                                    | 25           | 32          | 57          | 1.1  | 19            | 33.3       |
| <b>Self-rated health</b>                                                                       |              |             |             |      |               |            |
| Very good                                                                                      | 306          | 328         | 634         | 12.5 | 7             | 1.1        |
| Good                                                                                           | 1348         | 1524        | 2872        | 56.6 | 83            | 2.9        |
| Fair                                                                                           | 616          | 697         | 1313        | 25.9 | 181           | 13.8       |
| Bad                                                                                            | 89           | 137         | 226         | 4.5  | 90            | 39.8       |
| Very bad                                                                                       | 12           | 6           | 18          | 0.4  | 9             | 50.0       |
| <b>General activity limitation</b>                                                             |              |             |             |      |               |            |
| Not limited at all                                                                             | 1561         | 1630        | 3191        | 63.2 | 114           | 3.6        |
| Limited but not severely                                                                       | 672          | 906         | 1578        | 31.3 | 166           | 10.5       |
| Severely limited                                                                               | 132          | 146         | 278         | 5.5  | 88            | 31.7       |
| <b>Longstanding illness. Yes</b>                                                               | 1052         | 1200        | 2252        | 44.7 | 244           | 10.8       |
| <b>Anxiety, now or earlier. Yes</b>                                                            | 110          | 223         | 333         | 6.6  | 111           | 33.3       |
| <b>Depression, now or earlier. Yes</b>                                                         | 145          | 230         | 375         | 7.4  | 138           | 36.8       |
| <b>Medication anxiety. Yes</b>                                                                 | 71           | 119         | 190         | 3.8  | 65            | 34.2       |
| <b>Medication antidepressants. Yes</b>                                                         | 85           | 173         | 258         | 5.1  | 66            | 25.6       |

1  
2  
3  
4  
5  
6 The total sample consisted of 53% women; 64.5% of the respondents were married, and 80.7% were  
7 cohabitating. For the total group, mean age was 55.7 and median age was 57.4; for individuals scoring in the  
8 depressed range on the MDI, the mean age was 50.2 and the median was 51.4 years.  
9

10  
11 Compared to the total sample, the respondents reporting symptoms of depression were younger, and more  
12 likely to be living alone, and to be unmarried. They were also more likely to have no postsecondary education,  
13 to be temporarily out of work (16.9% vs 3.7%), and to experience more frequent financial strain. Furthermore,  
14 their health indicators included: lower self-rated health, more reports of limited physical functioning, more  
15 reports of long lasting disease, and former anxiety or depression diagnoses; and more reports to be currently in  
16 pharmacological treatment for these disorders.  
17  
18

19  
20 *Figure 2. Responses on perceived barriers to accessing mental health care, proportions*  
21  
22  
23

24 Of those responding to the questions, more than half perceived no problems at all in accessing professional  
25 care, least of all transport.  
26

27 Among those who did have concerns about accessing or continuing professional mental health care, *Expense*  
28 was the most common problem, as 30.1% indicated expenses had prevented, deterred, or delayed them either  
29 *Quite a lot* or *A lot* (both responses aggregated in the *Quite a lot +* category in Figure 2). Likewise, the second  
30 most common concern was related to *Stigma*, phrased in the questionnaire as “what others might think, say or  
31 do”, which was a serious concern for 22.3%; approximately the same proportion (21.2%) had concerns related  
32 to *Knowledge*, or how to find help for a mental health problem. Transport was not a problem for 78.6%, with  
33 only 11.7% reporting it negatively affected access.  
34  
35  
36

37 Perceived barriers to accessing health care by SEP are shown in Table 2 (crude numbers are shown in  
38 Supplementary Table 2). Perceptions of *Stigma* did not show any significant difference across the  
39 socioeconomic groups, however measured. *Lack of Knowledge* was a significant problem for respondents  
40 without postsecondary education compared to those who had completed some postsecondary education  
41 (adjusted odd ratio (aOR) 2.26 confidence interval (CI) 1.1- 4.6) and for respondents with occasional (*Few*  
42 *months*), but not regular, financial strain when compared to those with no financial strain. Low SEP as  
43 measured by educational level and financial strain was associated with perceived barriers concerning *Transport*  
44 and *Expense*; whereas low SEP measured by employment status alone was associated with concerns related to  
45 *Transport*. The retired respondents were more likely to perceive bad *Experience* with mental health services as  
46 a barrier to seeking or continuing MHC compared to respondents who were working. *Transport* showed the  
47 greatest disparity across the socioeconomic groups.  
48  
49  
50  
51  
52  
53  
54  
55  
56  
57  
58  
59  
60

Table 2. Adjusted odds ratios for perceived barriers for accessing MHC by three indicators of SEP

| Table 2. Adjusted odds ratios for five perceived barriers accessing mental health care by employment status, education, and financial strain |                   |              |               |     |                  |              |              |               |                  |              |              |               |
|----------------------------------------------------------------------------------------------------------------------------------------------|-------------------|--------------|---------------|-----|------------------|--------------|--------------|---------------|------------------|--------------|--------------|---------------|
| Stigma                                                                                                                                       | Employment status |              |               | n   | Education        |              |              | n             | Financial strain |              |              | n             |
|                                                                                                                                              | aOR               | CI           |               |     | aOR              | CI           |              |               | aOR              | CI           |              |               |
| Working                                                                                                                                      | 1                 |              |               | 291 | 3+ years         | 1            |              | 290           | Not at all       | 1            |              | 289           |
| Temp. Not working                                                                                                                            | .9201             | .4880        | 1.735         |     | 1-3 years        | 1.087        | .5740        | 2.058         | Few months       | .8994        | .4841        | 1.671         |
| Retired                                                                                                                                      | .6808             | .3420        | 1.356         |     | No postsecondary | 1.166        | .5833        | 2.332         | Half the time+   | 1.749        | .6933        | 4.410         |
| Other                                                                                                                                        | .3815             | .1431        | 1.017         |     | Other            | .6699        | .1969        | 2.279         |                  |              |              |               |
| <b>Knowledge</b>                                                                                                                             |                   |              |               |     |                  |              |              |               |                  |              |              |               |
| Working                                                                                                                                      | 1                 |              |               | 292 | 3+ years         | 1            |              | 291           | Not at all       | 1            |              | 290           |
| Temp. Not working                                                                                                                            | 1.204             | .6390        | 2.268         |     | 1-3 years        | 1.597        | .8309        | 3.070         | Few months       | <b>2.515</b> | <b>1.335</b> | <b>4.739</b>  |
| Retired                                                                                                                                      | .5003             | .2480        | 1.009         |     | No postsecondary | <b>2.263</b> | <b>1.115</b> | <b>4.592</b>  | Half the time+   | 2.372        | .9404        | 5.985         |
| Other                                                                                                                                        | .5004             | .1884        | 1.329         |     | Other            | <b>4.752</b> | <b>1.297</b> | <b>17.412</b> |                  |              |              |               |
| <b>Expense</b>                                                                                                                               |                   |              |               |     |                  |              |              |               |                  |              |              |               |
| Working                                                                                                                                      | 1                 |              |               | 289 | 3+ years         | 1            |              | 288           | Not at all       | 1            |              | 289           |
| Temp. Not working                                                                                                                            | 1.700             | .8911        | 3.323         |     | 1-3 years        | 1.835        | .9324        | 3.612         | Few months       | <b>4.268</b> | <b>2.172</b> | <b>8.385</b>  |
| Retired                                                                                                                                      | 1.537             | .7451        | 3.171         |     | No postsecondary | <b>2.773</b> | <b>1.336</b> | <b>5.757</b>  | Half the time+   | <b>9.623</b> | <b>2.708</b> | <b>34.194</b> |
| Other                                                                                                                                        | .7456             | .2822        | 1.970         |     | Other            | 2.031        | .5762        | 7.156         |                  |              |              |               |
| <b>Experience</b>                                                                                                                            |                   |              |               |     |                  |              |              |               |                  |              |              |               |
| Working                                                                                                                                      | 1                 |              |               | 287 | 3+ years         | 1            |              | 286           | Not at all       | 1            |              | 286           |
| Temp. Not working                                                                                                                            | .9581             | .4820        | 1.905         |     | 1-3 years        | 1.043        | .5392        | 2.019         | Few months       | 1.152        | .5999        | 2.212         |
| Retired                                                                                                                                      | <b>2.143</b>      | <b>1.024</b> | <b>4.485</b>  |     | No postsecondary | .6435        | .3073        | 1.347         | Half the time+   | 2.385        | .9685        | 5.874         |
| Other                                                                                                                                        | 1.531             | .5932        | 3.952         |     | Other            | .7503        | .2024        | 2.781         |                  |              |              |               |
| <b>Transport</b>                                                                                                                             |                   |              |               |     |                  |              |              |               |                  |              |              |               |
| Working                                                                                                                                      | 1                 |              |               | 290 | 3+ years         | 1            |              | 289           | Not at all       | 1            |              | 288           |
| Temp. Not working                                                                                                                            | <b>3.184</b>      | <b>1.463</b> | <b>6.931</b>  |     | 1-3 years        | 1.603        | .6502        | 3.954         | Few months       | 1.746        | .8392        | 3.634         |
| Retired                                                                                                                                      | <b>4.442</b>      | <b>1.900</b> | <b>10.384</b> |     | No postsecondary | <b>2.988</b> | <b>1.187</b> | <b>7.518</b>  | Half the time+   | <b>9.889</b> | <b>3.745</b> | <b>26.113</b> |
| Other                                                                                                                                        | 2.169             | .6948        | 6.773         |     | Other            | 1.019        | .1835        | 5.659         |                  |              |              |               |

Adjusted for: gender; age +/- 60; 95% confidence intervals (CI), significant results are marked in bold

SEP showed no association with any of the barriers or with years of schooling (not shown). Using depression as independent variable, we found that severity of depression (both measured as a categorical variable and a score) was associated with perceived barriers in relation to *Expense* and *Transport*, but not associated with any other perceived barriers (see Supplementary Material Table 3).

## Discussion

### Principal findings

In this study of perceived barriers to accessing mental health care by respondents with present symptoms of depression, we found that almost 1/3 of the respondents indicated that *Expense* related to accessing MHC was a considerable barrier; this perception was more prevalent among individuals without postsecondary education and individuals experiencing financial strain. *Transport* presented the least prevalent barrier in general; but on the other hand, transportation also presented the greatest and most consistent socioeconomic disparity across all measurements of SEP. *Transport* and *expenses* associated with accessing mental health care were a problem for disadvantaged individuals.

Stigma was an issue of concern for 22% of the respondents but did not vary significantly according to SEP, whereas lack of knowledge about how to get help was a significantly greater problem for individuals without postsecondary education as compared to individuals with postsecondary education.

Lack of knowledge about how get to help and bad experience were perceived as a problem for 1/5 of the individuals overall as well.

#### *Strengths and weaknesses of the study*

A strength of this study was its use of information from a population study from a deprived area in combination with data on present depression score, information on SEP, and perceived barriers to accessing MHC; by this design we were able to determine the significance of different barriers to access for potential MHC patients in a deprived area. We are not aware of similar studies.

A limitation in our study was that the items used as dependable variables were not fully validated; validation would be preferable in order to compare to other studies. The BACE-3, at 30 questions, was too extensive to use in the LOFUS study, which already consisted of close to 100 questions; this was also the reasoning behind our focus on five central concepts of barriers to access. The external validity of the questions is supported by the use of generally accepted and validated concepts of abilities and as such is comparable to other studies. The content validity was tested by the panel of patients and patients' relatives and the questions found to be sound, but in retrospect, might not measure the concept of self-efficacy very well. We used the answer *Not relevant/Do not want to reply* as an indicator that the individual preferred to handle problems without help. It would have been prudent, however, to ask a more direct question about perceptions of need for care; it is possible that some individuals did not find the question relevant because while they experienced mental health issues, they did not perceive a need for further care. We found no correlation between the answer to the question of relevance and SEP, except for retired respondents, who tended to state *Not relevant* less, compared to respondents working (not shown).

Another limitation was that the question about transport was not clearly separated from the question about perceived barriers in relation to expenses, as it was not specified whether expenses included transportation-related expenses. Thus, we have no clear distinction between whether *Transport* as a barrier is primarily a logistical or economical barrier, or some combination thereof.

#### *Comparison with other studies*

The total sample contained more respondents in the age group 50 – 69 and fewer in the age groups younger and older compared to the study population; additionally, as compared to the background population the LOFUS sample is over represented by individuals with *+3 years postsecondary education vs no postsecondary education* by almost 3:1, according to general population statistics drawn from Statistics Denmark<sup>25</sup>. For the total sample, questions on self-rated health (SRH) were rated higher in the sample than the national levels<sup>36</sup> even though long-lasting illness was more prevalent in the sample (44.7% compared to national rate of 35.6%)<sup>36</sup>; the rate of respondents with *severely limited physical functioning* was close to the national proportions<sup>37</sup>. The group with symptoms of depression had scores well below national levels in all health-related variables. The total sample may overrepresent the middle-aged to older part of the population, an issue seen in national surveys, too<sup>38</sup>.

7.3% had symptoms of depression when the summed MDI score was used, which is a considerably higher rate than found by any other survey in Denmark; however, a recent national survey reported that 7.0% adults suffer from depressed mood, including 7.8% in the Region of Zealand<sup>36</sup>. Eurostat reported a prevalence of 6.3% adults with depressive symptoms and 3% with major depression symptoms in Denmark<sup>39</sup>. In the present study, 225 respondents reported both a core symptom of depression *Most of the time* or more and a summed MDI score



1  
2  
3  
4 >20, equivalent to a MDD prevalence of 4.4%. A comparable study by Ellervik et al. found 2.5% with a summed  
5 MDI score >25; we found 3.8%<sup>40</sup>. The present data is a subsample from a population survey in a deprived area,  
6 which could explain the high rate of depression symptoms found.  
7

8  
9 We found perceived stigma to be of *Quite a lot* or *A lot of concern* for 20% of the respondents. This  
10 corresponds with findings in a systematic review, where overall 20 – 25% respondents in 44 studies reported  
11 stigma as a barrier to accessing mental health services<sup>41</sup>. Stigma showed no association to SEP in our data. We  
12 have not been able to verify this in other studies except for one Canadian study, which likewise found no  
13 association between years of education and experiencing stigma in mental health care. However, they did find  
14 perceived stigma more prevalent among respondents not working<sup>42</sup>. In the Panel of Relatives and Patients of  
15 Psychiatry Services of Region Zealand, it was said that patients with mental disorders, and their relatives, pull  
16 the curtains together when they meet with each other privately, and that patients are indeed concerned with  
17 what others might think.  
18  
19  
20

21 One in five respondents experienced *Knowledge* as a barrier and had doubts about what to do to get  
22 professional help. With free access to a GP in Denmark, and the GP universally understood to be the  
23 gatekeeper for referrals, this is puzzling. Among respondents with symptoms of depression, 138 reported  
24 former or present depression, and 35 of them (25%) still answered that they experienced *Knowledge* to be a  
25 barrier *Quite a lot* or *A lot* of the time. Of those with symptoms of depression and presently taking  
26 antidepressant medication, 8 (12%) had doubts about what to do to get help. This could be due to the nature  
27 of the disease, but we did not find support for this, as we found no association to *Knowledge* with the severity  
28 of symptoms of depression. However, a Canadian study on perceived unmet need by respondents with  
29 symptoms of anxiety or depression found high symptom scores were associated with a higher degree of unmet  
30 need<sup>7</sup>, and not knowing how or where to get help was the most reported reason. The Panel of Relatives and  
31 Patients of Psychiatry Services of Region Zealand was not very surprised by this finding: despite free access to a  
32 GP, one individual reported that he could not get a family-GP, but had to meet changing doctors in a regional  
33 clinic (due to lack of GP's in the area). Another mentioned the waiting time for an appointment with the GP  
34 could be weeks (due to lack of GP's).  
35  
36  
37  
38  
39

40 It could be argued that older people may be more reluctant to use MHC and feel more stigmatized by the need  
41 for psychotherapy<sup>43 44</sup>. We did not find support for this, as the retired group did not differ in perception of  
42 stigma from employed persons. Likewise, older retired persons might be less willing to pay for the expenses  
43 associated with treatment, but we did not find support for this either, as expense was not a significant barrier  
44 for the group retired compared to the group working.  
45  
46

47 Use of mental health care is sensitive to cost<sup>45</sup>, and especially so for persons in low SEP<sup>46</sup>. This corresponds with  
48 our findings that expenses associated with mental health care was considered a common barrier for seeking  
49 help and concern of almost 1/3 of our respondents, and by two- to five-fold more by respondents without  
50 postsecondary education or in financial strain. This knowledge is important when research has shown that  
51 financial strain is strongly associated with higher odds for depression<sup>11</sup> and for prescription of  
52 antidepressants<sup>47</sup>. A German study found that even with free access to a psychologist these services are used  
53  
54  
55  
56  
57  
58  
59  
60

1  
2  
3  
4 less by people in low SEP<sup>19</sup>, which could be explained in part by our findings; people without postsecondary  
5 education may have less knowledge of how to access professional MHC, thus leading to lower usage of  
6 available services.  
7

8  
9 Experience with former mental health care treatment made retired respondents more reluctant to seek MHC  
10 as compared to the working population. This may not necessarily be due to bad experiences with health care  
11 professionals, though stigmatization can be a problem in health services too<sup>48</sup>; reports of past experience as a  
12 barrier could also indicate bad experience with side effects from a medication. Our study was not designed to  
13 capture or explore this nuance. Retired individuals are more likely to have more experience with health care,  
14 and this group includes people receiving early retirement pensions, which could indicate a chronic illness  
15 leading to early retirement and thus more opportunities for more bad experiences. The patient panel  
16 questioned the respondents' experience with MHC, since the rates of bad past experiences were so low; one  
17 remarking: "Those who are really feeling bad have not participated in this survey". For the panel, bad  
18 experience was a common deterrent to MHC, which may indicate an important area of future study.  
19  
20  
21

22  
23 Transport was perceived to be a greater problem by persons in low SEP compared to individuals in high SEP.  
24 This aligns well with our previous findings of the impact of distance and SEP on MHC use by patients in  
25 antidepressant treatment<sup>21</sup>. However, the question was not well distinguished from the question on expenses.  
26 Difficulty with transport or travelling includes the time spent to reach services and coordinate with other  
27 obligations – taking care of family duties or take time off at work, etc. Reliance on infrequent or inadequate  
28 public transportation could also be a reason to answer positively to this question, but the study was not  
29 designed to capture information regarding public versus private transportation, e.g. The patient panel was  
30 surprised that transport was a minor issue for the respondents, since it was viewed by them to be both time-  
31 consuming and expensive.  
32  
33  
34  
35  
36  
37

### 38 *Meaning of the study and possible explanations and implication for policymakers*

39 The study aimed to evaluate if perceived barriers to accessing mental health care differ across individuals with  
40 symptoms of depression according to their SEP. The answer in this study is quite clear: lack of postsecondary  
41 education was linked to greater perceived barriers to mental health care and expenses are considered a barrier  
42 to mental health care for those with no postsecondary education and in financial strain. Low mental health  
43 literacy, defined as knowledge and beliefs about mental disorders which aid in their recognition, management  
44 and prevention<sup>49</sup>, could be a part of the explanation, since low mental health literacy is also associated with  
45 low SEP<sup>50</sup>. Thus, empowering the community to take action for better mental health literacy<sup>51</sup> can lead to  
46 increased help-seeking by individuals in low SEP. In Denmark, two programs on improving mental health  
47 literacy exist: Mental Health First Aid<sup>52</sup> and the ABC mental health initiative<sup>53</sup>, both adopted from Australia. An  
48 approach directed more specifically toward deprived areas within such programs might improve SEP equity in  
49 mental health care treatment.  
50  
51  
52  
53  
54  
55  
56  
57  
58  
59  
60

1  
2  
3  
4 Addressing barriers and easing access for the deprived is obviously necessary. Lack of postsecondary education  
5 is associated with greater prevalence of perception of barriers to mental health care, in addition to an  
6 increased prevalence of mood disorders. Clearly, our results showed that *Expense* is a barrier for people in low  
7 SEP, but as found in the German study<sup>19</sup>, people in low SEP use psychologists less frequently even with free  
8 access. Psychotherapy is associated with the ability to engage, which in itself could be more difficult if an  
9 individual struggles with social and economic problems on top of mental ones. In order to address these  
10 related barriers, the deprived and depressed probably have additional needs beyond medication and  
11 psychotherapy, such as social supports and social/domestic/workplace intervention.  
12  
13  
14

15 In a future study it could be interesting to investigate the association between depression score, perceived  
16 barriers and use of MHC for a period after the score. Future research could also investigate which experiences  
17 cause retired respondents with symptoms of depression to hesitate to access mental health care. Further  
18 improvements and validation of a short form questionnaire as the present could be beneficial.  
19  
20  
21

### 22 **Author contributions**

23 AP conceived the research and developed and validated the questions on barriers supervised by AH. AP wrote  
24 the first draft of the manuscript assisted by LHH. AH, ES, and FBW contributed to the data analysis,  
25 interpretation of results and critical revision of the manuscript.  
26  
27  
28  
29

### 30 **Acknowledgement**

31 With acknowledgement to the Panel of Relatives and Patients of Psychiatry Services of Region Zealand for  
32 contributing to validate the questions on perceived barriers and commenting on the outcomes, with special  
33 gratitude to Anja Bang. We thank LOFUS for providing the data and Randi Jepsen for kind support. We also  
34 thank the Health Research Foundation of Region Zealand for financial support and particularly former head  
35 nurse Tove Kjærbo for initiating the study.  
36  
37

38 Data sharing: No additional data available  
39  
40

### 41 **References**

- 42 1. Global, regional, and national incidence, prevalence, and years lived with disability for 328 diseases and  
43 injuries for 195 countries, 1990–2016: a systematic analysis for the Global Burden of Disease Study  
44 2016. *Lancet* 2017;390(10100):1211-59. doi: 10.1016/s0140-6736(17)32154-2 [published Online First:  
45 2017/09/19]
- 46 2. Elovainio M, Pulkki-Raback L, Jokela M, et al. Socioeconomic status and the development of depressive  
47 symptoms from childhood to adulthood: a longitudinal analysis across 27 years of follow-up in the  
48 Young Finns study. *Soc Sci Med* 2012;74(6):923-29. doi: S0277-9536(12)00021-4  
49 [pii];10.1016/j.socscimed.2011.12.017 [doi]
- 50 3. Asselmann E, Wittchen HU, Lieb R, et al. Sociodemographic, clinical, and functional long-term outcomes in  
51 adolescents and young adults with mental disorders. *Acta Psychiatr Scand* 2018;137(1):6-17. doi:  
52 10.1111/acps.12792 [published Online First: 2017/09/02]  
53  
54  
55  
56  
57  
58  
59  
60

4. Thielen K, Nygaard E, Andersen I, et al. Employment consequences of depressive symptoms and work demands individually and combined. *Eur J Public Health* 2014;24(1):34 - 39.
5. Laursen TM, Musliner KL, Benros ME, et al. Mortality and life expectancy in persons with severe unipolar depression. *J Affect Disord* 2016;193:203-7. doi: 10.1016/j.jad.2015.12.067. Epub;2016 Jan 6.:203-07.
6. Roness A, Mykletun A, Dahl AA. Help-seeking behaviour in patients with anxiety disorder and depression. *Acta Psychiatr Scand* 2005;111(1):51-58.
7. Dezetter A, Duhoux A, Menear M, et al. Reasons and Determinants for Perceiving Unmet Needs for Mental Health in Primary Care in Quebec. *Can J Psychiatry* 2015;60(6):284-93.
8. Thornicroft G, Chatterji S, Evans-Lacko S, et al. Undertreatment of people with major depressive disorder in 21 countries. *Br J Psychiatry* 2017;210(2):119-24.
9. Lorant V, Deliege D, Eaton W, et al. Socioeconomic inequalities in depression: a meta-analysis. *Am J Epidemiol* 2003;157(2):98-112.
10. Barbaglia MG, M. tH, Dorsselaer S, et al. Negative socioeconomic changes and mental disorders: a longitudinal study. *J Epidemiol Community Health* 2015;69(1):55-62.
11. Dijkstra-Kersten SM, Biesheuvel-Leliefeld KE, van der Wouden JC, et al. Associations of financial strain and income with depressive and anxiety disorders. *J Epidemiol Community Health* 2015:jech-205088.
12. Ahnquist J, Wamala SP. Economic hardships in adulthood and mental health in Sweden. The Swedish National Public Health Survey 2009. *BMC Public Health* 2011;11:788. doi: 10.1186/1471-2458-11-788.:788-11.
13. van Krugten FC, Kaddouri M, Goorden M, et al. Indicators of patients with major depressive disorder in need of highly specialized care: A systematic review. *PloS one* 2017;12(2):e0171659. doi: 10.1371/journal.pone.0171659 [published Online First: 2017/02/09]
14. Glozier N, Davenport T, Hickie IB. Identification and management of depression in Australian primary care and access to specialist mental health care. *Psychiatr Serv* 2012;63(12):1247-51. doi: 1392910 [pii];10.1176/appi.ps.201200017 [doi]
15. Dey M, Jorm AF. Social determinants of mental health service utilization in Switzerland. *Int J Public Health* 2017;62(1):85-93.
16. Boerema AM, Ten Have M, Kleiboer A, et al. Demographic and need factors of early, delayed and no mental health care use in major depression: a prospective study. *BMC psychiatry* 2017;17(1):367. doi: 10.1186/s12888-017-1531-8 [published Online First: 2017/11/18]
17. Vasiliadis HM, Tempier R, Lesage A, et al. General practice and mental health care: determinants of outpatient service use. *Can J Psychiatry* 2009;54(7):468-76.
18. Hansen AH, Høye A. Gender differences in the use of psychiatric outpatient specialist services in Tromsø, Norway are dependent on age: a population-based cross-sectional survey. *BMC Health Serv Res* 2015;15:. doi:10.1186/s12913-015-1146-z.:doi-1146.
19. Epping J, Muschik D, Geyer S. Social inequalities in the utilization of outpatient psychotherapy: analyses of registry data from German statutory health insurance. *Int J Equity Health* 2017;16(1):147-0644.
20. Evans-Lacko S, Aguilar-Gaxiola S, Al-Hamzawi A, et al. Socio-economic variations in the mental health treatment gap for people with anxiety, mood, and substance use disorders: results from the WHO World Mental Health (WMH) surveys. *Psychol Med* 2017:1-12. doi: 10.1017/s0033291717003336 [published Online First: 2017/11/28]
21. Packness A, Waldorff FB, Christensen RD, et al. Impact of socioeconomic position and distance on mental health care utilization: a nationwide Danish follow-up study. *Soc Psychiatry Psychiatr Epidemiol* 2017:10-1437. doi: doi: 10.1007/s00127-017-1437-2

22. Pedersen KM, Andersen JS, Sondergaard J. General practice and primary health care in Denmark. *J Am Board Fam Med* 2012;25 Suppl 1:S34-8. doi: 10.3122/jabfm.2012.02.110216.:S34-S38.
23. Larsen A. Psykologbehandling: [www.sundhed.dk](http://www.sundhed.dk); 2014 [updated 9/29/2014. Available from: [www.sundhed.dk/borger/sygdomme-a-aa/sociale-ydelser/sociale-ydelser/behandling/psykologbehandling/](http://www.sundhed.dk/borger/sygdomme-a-aa/sociale-ydelser/sociale-ydelser/behandling/psykologbehandling/)].
24. Ministry of Economics- and Interior. Key figures of municipalities [Public Database]. Økonomi- og Indenrigsministeriet; [Available from: [www.noegletal.dk](http://www.noegletal.dk) accessed 20/02/ 2018.
25. Statistics Denmark. StatBank Denmark [Public Database]. Statistics Denmark; [Available from: [www.statistikbanken.dk](http://www.statistikbanken.dk) accessed 11/11 2015.
26. Pedersen CB. The Danish Civil Registration System. *Scand J Public Health* 2011;39(7 Suppl):22-25.
27. Olsen LR, Jensen DV, Noerholm V, et al. The internal and external validity of the Major Depression Inventory in measuring severity of depressive states. *Psychol Med* 2003;33(2):351-56.
28. World Health Organization. The ICD-10 Classification of Mental and Behavioural Disorders 1989.
29. Bech P, Rasmussen NA, Olsen LR, et al. The sensitivity and specificity of the Major Depression Inventory, using the Present State Examination as the index of diagnostic validity. *J Affect Disord* 2001;66(2-3):159-64. [published Online First: 2001/10/02]
30. Bech P, Timmerby N, Martiny K, et al. Psychometric evaluation of the Major Depression Inventory (MDI) as depression severity scale using the LEAD (Longitudinal Expert Assessment of All Data) as index of validity. *BMC Psychiatry* 2015;15:190. doi: 10.1186/s12888-015-0529-3.:190-0529.
31. Bech P. Clinical Psychometrics. First ed. Oxford: John Wiley & Sons, Ltd. 2012:153-53.
32. European Union. European Health Interview Survey (EHIS wave 2). Methodological manual. Methodologies and Working papers ed. Luxembourg: Eurostat 2013:1-202.
33. Clement S, Brohan E, Jeffery D, et al. Development and psychometric properties the Barriers to Access to Care Evaluation scale (BACE) related to people with mental ill health. *BMC Psychiatry* 2012;12:36. doi: 1471-244X-12-36 [pii];10.1186/1471-244X-12-36 [doi]
34. Levesque JF, Harris MF, Russell G. Patient-centred access to health care: conceptualising access at the interface of health systems and populations. *Int J Equity Health* 2013;12:18. doi: 10.1186/1475-9276-12-18.:18-12.
35. Stata Statistical Software: Release 15. [program]. 1 version: College Station, TX: StataCorp LP., 2017.
36. Sundhedsstyrelsen NBoH. [Health of the Danes - The National Health Profile]. In: Jensen HD, M; Ekholm, O; Christensen AI, ed. København, 2018:1-134.
37. Johnsen NFD, M.; Michelsen S.I.; Juel K. [Health profile of adults with impaired or reduced physical functioning]. In: Folkesundhed SIF, ed. København: Syddansk Universitet, 2014:1-134.
38. National Board of Health. [Mental Health of Adult Danes]. København: Sundhedsstyrelsen 2010.
39. European Union. Eurostat Luxembourg: European Commission; [Available from: <http://ec.europa.eu/eurostat/web/health/health-status-determinants/data/database> accessed 04/02 2018.
40. Ellervik C, Kvetny J, Christensen KS, et al. Prevalence of depression, quality of life and antidepressant treatment in the Danish General Suburban Population Study. *Nord J Psychiatry* 2014 doi: 10.3109/08039488.2013.877074 [doi]
41. Clement S, Schauman O, Graham T, et al. What is the impact of mental health-related stigma on help-seeking? A systematic review of quantitative and qualitative studies. *Psychol Med* 2015;45(1):11-27.
42. Patten SB, Williams JV, Lavorato DH, et al. Perceived Stigma among Recipients of Mental Health Care in the General Canadian Population. *Canadian journal of psychiatry Revue canadienne de psychiatrie* 2016;61(8):480-8. doi: 10.1177/0706743716639928 [published Online First: 2016/06/17]

- 1  
2  
3  
4 43. Conner KO, Copeland VC, Grote NK, et al. Mental health treatment seeking among older adults with  
5 depression: the impact of stigma and race. *The American journal of geriatric psychiatry : official journal*  
6 *of the American Association for Geriatric Psychiatry* 2010;18(6):531-43. doi:  
7 10.1097/JGP.0b013e3181cc0366 [published Online First: 2010/03/12]  
8  
9 44. ten Have M, de Graaf R, Ormel J, et al. Are attitudes towards mental health help-seeking associated with  
10 service use? Results from the European Study of Epidemiology of Mental Disorders. *Soc Psychiatry*  
11 *Psychiatr Epidemiol* 2010;45(2):153-63.  
12 45. Sevilla-Dedieu C, Kovess-Masfety V, Gilbert F, et al. Mental health care and out-of-pocket expenditures in  
13 Europe: results from the ESEMeD project. *J Ment Health Policy Econ* 2011;14(2):95-105.  
14 46. Kiil A, Houlberg K. How does copayment for health care services affect demand, health and redistribution?  
15 A systematic review of the empirical evidence from 1990 to 2011. *Eur J Health Econ* 2014;15(8):813-28.  
16 47. Ahnquist J, Wamala SP. Economic hardships in adulthood and mental health in Sweden. The Swedish  
17 National Public Health Survey 2009. *BMC Public Health* 2011;11:788. doi: 10.1186/1471-2458-11-788  
18 48. Mood Disorders Society of Canada. Stigma and discrimination - as expressed by mental health  
19 professionals, 2007.  
20 49. Jorm AF, Korten AE, Jacomb PA, et al. "Mental health literacy": a survey of the public's ability to recognise  
21 mental disorders and their beliefs about the effectiveness of treatment. *The Medical journal of*  
22 *Australia* 1997;166(4):182-6. [published Online First: 1997/02/17]  
23 50. Dunn KI, Goldney RD, Grande ED, et al. Quantification and examination of depression-related mental health  
24 literacy. *Journal of evaluation in clinical practice* 2009;15(4):650-3. doi: 10.1111/j.1365-  
25 2753.2008.01067.x [published Online First: 2009/06/16]  
26 51. Jorm AF. Mental health literacy: empowering the community to take action for better mental health. *The*  
27 *American psychologist* 2012;67(3):231-43. doi: 10.1037/a0025957 [published Online First: 2011/11/02]  
28 52. Jensen KB, Morthorst BR, Vendsborg PB, et al. Effectiveness of Mental Health First Aid training in Denmark:  
29 a randomized trial in waitlist design. *Soc Psychiatry Psychiatr Epidemiol* 2016;51(4):597-606. doi:  
30 10.1007/s00127-016-1176-9 [published Online First: 2016/02/04]  
31 53. Koushede V. Act-Belong-Comit: National Institute of Public Health; 2018 [Available from: <http://www.sifolkgesundhed.dk/Forskning/Befolkningens%20sundhedstilstand/Mental%20sundhed/ABC%20for%20mental%20sundhed.aspx?lang=en> accessed 04.04 2018.  
32  
33  
34  
35  
36  
37  
38  
39  
40  
41  
42  
43  
44  
45  
46  
47  
48  
49  
50  
51  
52  
53  
54  
55  
56  
57  
58  
59  
60



Figure 1. Sampling from the Lolland Falster Health Study

209x136mm (300 x 300 DPI)

1  
2  
3  
4  
5  
6  
7  
8  
9  
10  
11  
12  
13  
14  
15  
16  
17  
18  
19  
20  
21  
22  
23  
24  
25  
26  
27  
28  
29  
30  
31  
32  
33  
34  
35  
36  
37  
38  
39  
40  
41  
42  
43  
44  
45  
46  
47  
48  
49  
50  
51  
52  
53  
54  
55  
56  
57  
58  
59  
60

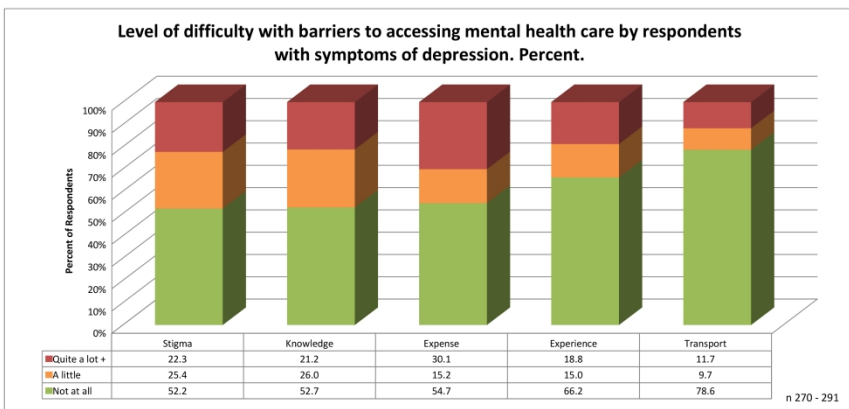

Figure 2. Responses on perceived barriers to accessing mental health care, proportions

331x175mm (300 x 300 DPI)



Socioeconomic position and perceived barriers to accessing mental health care by individuals with symptoms of depression: Results from the Lolland-Falster Health Study.

**Supplementary**

*Conceptual frame*

Patients’ choice of care will relate to personal preferences and abilities to access care. In a comprehensive theoretical approach by Levesque et al\* they combine several theories on access to health care and final treatment outcome. The model is patient-centered and based on service demand and service supply between which they describe the stepwise fulfilment of needs in the process from recognizing a health care need to a finalized treatment. The model has five central concepts associated with enforcing or inhibiting access on the supply-side, and five corresponding abilities on the demand-side, likewise with associated enforcing or inhibiting factors.

Figure 1: Model of a conceptual framework of access to health care\*

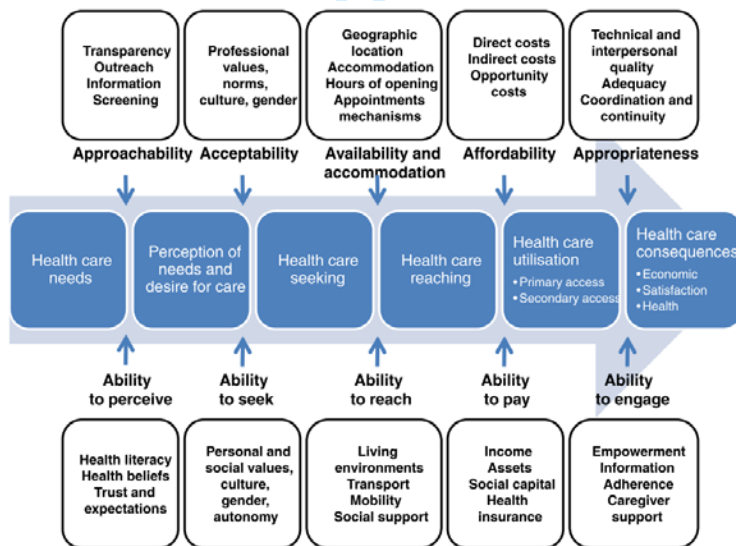

\* Levesque JF, Harris MF, Russell G. Patient-centred access to health care: conceptualising access at the interface of health systems and populations. *Int J Equity Health* 2013;12:18. doi: 10.1186/1475-9276-12-18.:18-12.

Socioeconomic position and perceived barriers to accessing mental health care by individuals with symptoms of depression:  
Results from the Lolland-Falster Health Study.

Table 1. Questionnaire

**Supplementary table: Condensation of the Barriers to Access to Care Evaluation scale (BACE v3)**

| Q no | BACE v3 Question                                                                                                           | Abilities # | Covered by question $\alpha$ |
|------|----------------------------------------------------------------------------------------------------------------------------|-------------|------------------------------|
| 1    | Being unsure where to go to get professional care                                                                          | Perceive    | 1                            |
| 2.   | Wanting to solve the problem on my own                                                                                     | Perceive    | (6)                          |
| 3.   | Concern that I might be seen as weak for having a mental health problem                                                    | Seek        | 2                            |
| 4.   | Fear of being put in hospital against my will                                                                              | Seek        | 2                            |
| 5.   | Concern that it might harm my chances when applying for jobs                                                               | Seek        | 2                            |
| 6.   | Problems with transport or travelling to appointments                                                                      | Reach       | 3                            |
| 7.   | Thinking the problem would get better by itself                                                                            | Perceive    |                              |
| 8.   | Concern about what my family might think or say                                                                            | Seek        | 2                            |
| 9.   | Feeling embarrassed or ashamed                                                                                             | Seek        | 2                            |
| 10.  | Preferring to get alternative forms of care (e.g. spiritual care, non-Western healing / medicine, complementary therapies) | Perceive    |                              |
| 11.  | Not being able to afford the financial costs involved                                                                      | Pay         | 4                            |
| 12.  | Concern that I might be seen as 'crazy'                                                                                    | Seek        | 2                            |
| 13.  | Thinking that professional care probably would not help                                                                    |             | (6)                          |
| 14.  | Concern that I might be seen as a bad parent                                                                               | Seek        | 2                            |
| 15.  | Professionals from my own ethnic or cultural group not being available                                                     |             |                              |
| 16.  | Being too unwell to ask for help                                                                                           |             |                              |
| 17.  | Concern that people I know might find out                                                                                  | Seek        | 2                            |
| 18.  | Dislike of talking about my feelings, emotions or thoughts                                                                 | Seek        |                              |
| 19.  | Concern that people might not take me seriously if they found out I was having professional care                           | Seek        | 2                            |
| 20.  | Concerns about the treatments available (e.g. medication side effects)                                                     | Perceive    |                              |
| 21.  | Not wanting a mental health problem to be on my medical records                                                            | Seek        | 2                            |
| 22.  | Having had previous bad experiences with professional care for mental health                                               | Engage      | 5                            |
| 23.  | Preferring to get help from family or friends                                                                              | Seek        |                              |
| 24.  | Concern that my children may be taken into care or that I may lose access or custody without my agreement                  | Seek        | 2                            |
| 25.  | Thinking I did not have a problem                                                                                          | Perceive    | 6                            |
| 26.  | Concern about what my friends might think or say                                                                           | Seek        | 2                            |
| 27.  | Difficulty taking time off work                                                                                            | Reach       |                              |
| 28.  | Concern about what people at work might think, say or do                                                                   | Seek        | 2                            |
| 29.  | Having problems with childcare while I receive professional care                                                           | Reach       | 3                            |
| 30.  | Having no one who could help me get professional care                                                                      | Reach       |                              |

Clement et al. *BMC Psychiatry* 2012, 12:36

*Development and psychometric properties the Development and psychometric properties the Barriers to Access to Care Evaluation scale (BACE) - related to people with mental ill health*

# According to model of Levesque et al. *International Journal for Equity in Health* 2013, 12:18

Patient-centered access to health care: conceptualizing access at the interface of health systems and populations

$\alpha$  The questions in the questionnaire of the present study

Socioeconomic position and perceived barriers to accessing mental health care by individuals with symptoms of depression: Results from the Lolland-Falster Health Study.

**Suppl. Table 2: Perceived barriers accessing MHC & symptoms of depression, crude numbers**

| <b>Stigma</b>     | <b>Mild</b> | <b>Mod.</b> | <b>Severe</b> | <b>Sum</b> | <b>Pct (resp)</b> |
|-------------------|-------------|-------------|---------------|------------|-------------------|
| Not at all        | 73          | 50          | 29            | 152        | 52,2              |
| A little          | 39          | 20          | 15            | 74         | 25,4              |
| Quite a lot       | 16          | 13          | 10            | 39         | 13,4              |
| A lot             | 10          | 6           | 10            | 26         | 8,9               |
| NA                | 11          | 6           | 6             | 23         |                   |
| <b>Sum</b>        | <b>149</b>  | <b>95</b>   | <b>70</b>     | <b>314</b> | <b>291</b>        |
| <b>Knowledge</b>  | <b>Mild</b> | <b>Mod.</b> | <b>Severe</b> | <b>Sum</b> | <b>Pct (resp)</b> |
| Not at all        | 77          | 50          | 27            | 154        | 52,7              |
| A little          | 41          | 21          | 14            | 76         | 26,0              |
| Quite a lot       | 20          | 13          | 16            | 49         | 16,8              |
| A lot             | 2           | 4           | 7             | 13         | 4,5               |
| NA                | 9           | 7           | 6             | 22         |                   |
| <b>Sum</b>        | <b>149</b>  | <b>95</b>   | <b>70</b>     | <b>314</b> | <b>292</b>        |
| <b>Expense</b>    | <b>Mild</b> | <b>Mod.</b> | <b>Severe</b> | <b>Sum</b> | <b>Pct (resp)</b> |
| Not at all        | 84          | 47          | 27            | 158        | 54,7              |
| A little          | 20          | 14          | 10            | 44         | 15,2              |
| Quite a lot       | 15          | 14          | 15            | 44         | 15,2              |
| A lot             | 18          | 13          | 12            | 43         | 14,9              |
| NA                | 12          | 7           | 6             | 25         |                   |
| <b>Sum</b>        | <b>149</b>  | <b>95</b>   | <b>70</b>     | <b>314</b> | <b>289</b>        |
| <b>Experience</b> | <b>Mild</b> | <b>Mod.</b> | <b>Severe</b> | <b>Sum</b> | <b>Pct (resp)</b> |
| Not at all        | 98          | 58          | 34            | 190        | 66,2              |
| A little          | 22          | 11          | 10            | 43         | 15,0              |
| Quite a lot       | 15          | 9           | 8             | 32         | 11,1              |
| A lot             | 4           | 10          | 8             | 22         | 7,7               |
| NA                | 10          | 7           | 10            | 27         |                   |
| <b>Sum</b>        | <b>149</b>  | <b>95</b>   | <b>70</b>     | <b>314</b> | <b>287</b>        |
| <b>Transport</b>  | <b>Mild</b> | <b>Mod.</b> | <b>Severe</b> | <b>Sum</b> | <b>Pct (resp)</b> |
| Not at all        | 117         | 66          | 45            | 228        | 78,6              |
| A little          | 10          | 11          | 7             | 28         | 9,7               |
| Quite a lot       | 6           | 4           | 9             | 19         | 6,6               |
| A lot             | 6           | 6           | 3             | 15         | 5,2               |
| NA                | 10          | 8           | 6             | 24         |                   |
| <b>Sum</b>        | <b>149</b>  | <b>95</b>   | <b>70</b>     | <b>314</b> | <b>290</b>        |

**Suppl. Table 3. Adjusted odds ratios for five perceived barriers accessing mental health care by severity of symptoms of depression**

| Dep. Grade | Stigma |             |     | Knowledge |              |     | Expense      |                    |     | Experience |             |     | Transport    |                    |     |
|------------|--------|-------------|-----|-----------|--------------|-----|--------------|--------------------|-----|------------|-------------|-----|--------------|--------------------|-----|
|            | aOR    | CI          | n   | aOR       | CI           | n   | aOR          | CI                 | n   | aOR        | CI          | n   | aOR          | CI                 | n   |
| Mild       | 1      |             | 291 | 1         |              | 292 | 1            |                    | 289 | 1          |             | 287 | 1            |                    | 290 |
| Moderate   | .8463  | .4903 1.461 |     | .9464     | .5510 16.256 |     | 1.350        | .7722 2.359        |     | 1.220      | .6854 2.172 |     | 1.684        | .8614 3.294        |     |
| Severe     | 1.259  | .6867 2.309 |     | 1.723     | .9420 3.151  |     | <b>2.043</b> | <b>1.097 3.804</b> |     | 1.739      | .9220 3.279 |     | <b>2.225</b> | <b>1.098 4.512</b> |     |
| MDI score# | 1.005  | .9628 1.050 |     | 1.030     | .9864 10.750 |     | <b>1.063</b> | <b>1.016 1.112</b> |     | 1.035      | .9891 1.083 |     | <b>1.076</b> | <b>1.024 1.130</b> |     |

Adjusted for: gender; age +/- 60; 95% confidence intervals (CI), marked bold  
 # Major Depression Inventory scale > 20 ≤ 50, ungrouped

STROBE Statement for the study: **Socioeconomic position and perceived barriers to access mental health care by individuals with symptoms of depression. Results from the Lolland-Falster Health Study.**

|                              | Item No | Recommendation                                                                                                                                                                                    | Addressed on page:                     |
|------------------------------|---------|---------------------------------------------------------------------------------------------------------------------------------------------------------------------------------------------------|----------------------------------------|
| <b>Title and abstract</b>    | 1       | (a) Indicate the study's design with a commonly used term in the title or the abstract                                                                                                            | 4                                      |
|                              |         | (b) Provide in the abstract an informative and balanced summary of what was done and what was found                                                                                               | 2                                      |
| <b>Introduction</b>          |         |                                                                                                                                                                                                   |                                        |
| Background/rationale         | 2       | Explain the scientific background and rationale for the investigation being reported                                                                                                              | 3                                      |
| Objectives                   | 3       | State specific objectives, including any prespecified hypotheses                                                                                                                                  | 4                                      |
| <b>Methods</b>               |         |                                                                                                                                                                                                   |                                        |
| Study design                 | 4       | Present key elements of study design early in the paper                                                                                                                                           | 4                                      |
| Setting                      | 5       | Describe the setting, locations, and relevant dates, including periods of recruitment, exposure, follow-up, and data collection                                                                   | 5                                      |
| Participants                 | 6       | (a) Give the eligibility criteria, and the sources and methods of selection of participants. Describe methods of follow-up                                                                        | 5                                      |
|                              |         | (b) For matched studies, give matching criteria and number of exposed and unexposed                                                                                                               |                                        |
| Variables                    | 7       | Clearly define all outcomes, exposures, predictors, potential confounders, and effect modifiers. Give diagnostic criteria, if applicable                                                          | 5 - 6<br>Table 1                       |
| Data sources/<br>measurement | 8*      | For each variable of interest, give sources of data and details of methods of assessment (measurement). Describe comparability of assessment methods if there is more than one group              | 5 - 6<br><i>Supplement<br/>Table 1</i> |
| Bias                         | 9       | Describe any efforts to address potential sources of bias                                                                                                                                         |                                        |
| Study size                   | 10      | Explain how the study size was arrived at                                                                                                                                                         | 7 & Figure 1                           |
| Quantitative variables       | 11      | Explain how quantitative variables were handled in the analyses. If applicable, describe which groupings were chosen and why                                                                      | 5 - 6                                  |
| Statistical methods          | 12      | (a) Describe all statistical methods, including those used to control for confounding                                                                                                             | 7                                      |
|                              |         | (b) Describe any methods used to examine subgroups and interactions                                                                                                                               |                                        |
|                              |         | (c) Explain how missing data were addressed                                                                                                                                                       |                                        |
|                              |         | (d) If applicable, explain how loss to follow-up was addressed                                                                                                                                    |                                        |
|                              |         | (e) Describe any sensitivity analyses                                                                                                                                                             |                                        |
| <b>Results</b>               |         |                                                                                                                                                                                                   |                                        |
| Participants                 | 13*     | (a) Report numbers of individuals at each stage of study—eg numbers potentially eligible, examined for eligibility, confirmed eligible, included in the study, completing follow-up, and analysed | 7                                      |
|                              |         | (b) Give reasons for non-participation at each stage                                                                                                                                              |                                        |
|                              |         | (c) Consider use of a flow diagram                                                                                                                                                                | Figure 1                               |
| Descriptive data             | 14*     | (a) Give characteristics of study participants (eg demographic, clinical, social) and information on exposures and potential confounders                                                          | Table 1                                |
|                              |         | (b) Indicate number of participants with missing data for each variable of interest                                                                                                               | Supplement<br>table 2                  |
|                              |         | (c) Summarise follow-up time (eg, average and total amount)                                                                                                                                       |                                        |
| Outcome data                 | 15*     | Report numbers of outcome events or summary measures over time                                                                                                                                    |                                        |

|    |                          |    |                                                                                                                                                                                                              |                        |
|----|--------------------------|----|--------------------------------------------------------------------------------------------------------------------------------------------------------------------------------------------------------------|------------------------|
| 1  | Main results             | 16 | (a) Give unadjusted estimates and, if applicable, confounder-adjusted estimates and their precision (eg, 95% confidence interval). Make clear which confounders were adjusted for and why they were included | Table 3<br>Table 4 + 5 |
| 2  |                          |    | (b) Report category boundaries when continuous variables were categorized                                                                                                                                    | 5                      |
| 3  |                          |    | (c) If relevant, consider translating estimates of relative risk into absolute risk for a meaningful time period                                                                                             |                        |
| 4  | Other analyses           | 17 | Report other analyses done—eg analyses of subgroups and interactions, and sensitivity analyses                                                                                                               |                        |
| 5  | <b>Discussion</b>        |    |                                                                                                                                                                                                              |                        |
| 6  | Key results              | 18 | Summarise key results with reference to study objectives                                                                                                                                                     | 10                     |
| 7  | Limitations              | 19 | Discuss limitations of the study, taking into account sources of potential bias or imprecision. Discuss both direction and magnitude of any potential bias                                                   | 10-11                  |
| 8  | Interpretation           | 20 | Give a cautious overall interpretation of results considering objectives, limitations, multiplicity of analyses, results from similar studies, and other relevant evidence                                   | 11-12                  |
| 9  | Generalisability         | 21 | Discuss the generalisability (external validity) of the study results                                                                                                                                        | 11                     |
| 10 | <b>Other information</b> |    |                                                                                                                                                                                                              |                        |
| 11 | Funding                  | 22 | Give the source of funding and the role of the funders for the present study and, if applicable, for the original study on which the present article is based                                                | 1 & 5                  |

\*Give information separately for exposed and unexposed groups.

**Note:** An Explanation and Elaboration article discusses each checklist item and gives methodological background and published examples of transparent reporting. The STROBE checklist is best used in conjunction with this article (freely available on the Web sites of PLoS Medicine at <http://www.plosmedicine.org/>, Annals of Internal Medicine at <http://www.annals.org/>, and Epidemiology at <http://www.epidem.com/>). Information on the STROBE Initiative is available at <http://www.strobe-statement.org>.

# BMJ Open

**Are perceived barriers to accessing mental health care associated with socioeconomic position among individuals with symptoms of depression? Questionnaire-results from the Lolland-Falster Health Study, a rural Danish population study.**

|                                 |                                                                                                                                                                                                                                                                                                                                                                                                                                                                                                                            |
|---------------------------------|----------------------------------------------------------------------------------------------------------------------------------------------------------------------------------------------------------------------------------------------------------------------------------------------------------------------------------------------------------------------------------------------------------------------------------------------------------------------------------------------------------------------------|
| Journal:                        | <i>BMJ Open</i>                                                                                                                                                                                                                                                                                                                                                                                                                                                                                                            |
| Manuscript ID                   | bmjopen-2018-023844.R3                                                                                                                                                                                                                                                                                                                                                                                                                                                                                                     |
| Article Type:                   | Research                                                                                                                                                                                                                                                                                                                                                                                                                                                                                                                   |
| Date Submitted by the Author:   | 02-Jan-2019                                                                                                                                                                                                                                                                                                                                                                                                                                                                                                                |
| Complete List of Authors:       | Packness, Aake; Syddansk Universitet Det Sundhedsvidenskabelige Fakultet, Research Unit for General Practice, Department of Public Health; Psykiatrien i Region Sjælland, Psychiatric Research Unit Halling, Anders; Lund University, Clinical sciences Malmo, CRC Simonsen, Erik; University of Copenhagen, Department of Clinical Medicine<br>Waldorff, Frans; University of Southern Denmark, Research Unit for General Practice, Health Science Department<br>Hastrup, Lene; Psychiatric Research Unit, Region Zealand |
| <b>Primary Subject Heading</b>: | Mental health                                                                                                                                                                                                                                                                                                                                                                                                                                                                                                              |
| Secondary Subject Heading:      | Public health, Health services research                                                                                                                                                                                                                                                                                                                                                                                                                                                                                    |
| Keywords:                       | Depression & mood disorders < PSYCHIATRY, MENTAL HEALTH, Organisation of health services < HEALTH SERVICES ADMINISTRATION & MANAGEMENT, PRIMARY CARE, PUBLIC HEALTH                                                                                                                                                                                                                                                                                                                                                        |
|                                 |                                                                                                                                                                                                                                                                                                                                                                                                                                                                                                                            |

SCHOLARONE™  
Manuscripts

1  
2  
3  
4  
5  
6  
7  
8  
9  
10  
11  
12  
13  
14  
15  
16  
17  
18  
19  
20  
21  
22  
23  
24  
25  
26  
27  
28  
29  
30  
31  
32  
33  
34  
35  
36  
37  
38  
39  
40  
41  
42  
43  
44  
45  
46  
47  
48  
49  
50  
51  
52  
53  
54  
55  
56  
57  
58  
59  
60

## Are perceived barriers to accessing mental health care associated with socioeconomic position among individuals with symptoms of depression? Questionnaire-results from the Lolland-Falster Health Study, a rural Danish population study.

A Packness, A Halling, E Simonsen, FB Waldorff, LH Hastrup

Department of Public Health, University of Southern Denmark, DK-5000 Odense, Denmark. Aake Packness, MPH, Research Unit for General Practice, University of Southern Denmark. Anders Halling, professor, Center for Primary Health Care Research, Institute of Clinical Sciences, Malmö, Lund University, SE-20213, Sweden; Erik Simonsen, professor, Department of Clinical Medicine, University of Copenhagen, Psychiatric Research Unit, Region of Zealand, Denmark; Frans B Waldorff, professor, Department of Public Health, University of Southern Denmark, DK-5000 Odense, Denmark. Lene H Hastrup, senior researcher, Psychiatric Research Unit, Region of Zealand, DK-4200 Slagelse, Denmark.

Correspondence to: A Packness [apackness@health.sdu.dk](mailto:apackness@health.sdu.dk)  
ORCID-0000-0002-4695-6214

Research Unit of General Practice, Institute of Public Health, J.B. Winsløvs Vej 9A, DK-5000 Odense C, Denmark. Telephone: +45 20537264

Word count 4,670 (excl. tables)/ 5,386 (incl. tables)

The Corresponding Author has the right to grant on behalf of all authors and does grant on behalf of all authors, an exclusive licence on a worldwide basis to the BMJ Publishing Group Ltd to permit this article (if accepted) to be published in BMJ editions and any other BMJPG products and sub-licences such use and exploit all subsidiary rights, as set out in our licence.

### Competing interest statement

All authors have completed the Unified Competing Interest form (available on request from the corresponding author) and declare: no support from any organisation for the submitted, no financial relationships with any organisations that might have an interest in the submitted work in the previous three years, and no other relationships or activities that could appear to have influenced the submitted work.

Funding: The study has been supported by an unrestricted grant (No 15-000342) from the Health Research Foundation of Region Zealand.

### Transparency declaration

Aake Packness affirms that this manuscript is an honest, accurate, and transparent account of the study being reported, that no important aspects of the study have been omitted, and that any discrepancies from the study as planned have been explained.

## Abstract

**Objective:** To evaluate if perceived barriers to accessing mental health care (MHC) among individuals with symptoms of depression are associated with their socioeconomic position (SEP).

**Design:** Cross-sectional questionnaire-based population survey from the Lolland-Falster Health Study (LOFUS) 2016-17 including 5,076 participants.

**Participants:** The study included 372 individuals participating in LOFUS with positive scores for depression according to the Major Depression Inventory (MDI).

**Interventions:** A set of five questions on perceived barriers to accessing professional care for a mental health problem was prompted to individuals responding with symptoms of depression (MDI score >20).

**Outcomes:** The association between SEP (as measured by educational attainment, employment status, and financial strain) and five different types of barriers to accessing MHC were analysed in separate multivariable logistic regression models adjusted for gender and age.

**Results:** 314 out of 372 (84%) completed the survey questions and reported experiencing barriers to MHC access. Worry about expenses related to seeking or continuing MHC was a considerable barrier for 30% of the individuals responding, and as such the greatest problem among the five types of barriers. 22% perceived stigma as a barrier to accessing MHC, but there was no association between perceived stigma and SEP.

Transportation was the barrier of least concern for individuals in general, but also the issue with greatest and most consistent socioeconomic disparity (odds ratio (OR) 2.99; confidence interval (CI) 1.19 – 7.52) for lowest vs highest educational groups, and likewise concerning expenses (OR 2.77, CI 1.34 – 5.76) for the same groups.

**Conclusion:** Issues associated with *Expenses* and *Transport* were more frequently perceived as barriers to accessing MHC for people in low SEP compared to people in high SEP. Stigma showed no association to SEP.

Informed written consent was obtained. Region Zealand's Ethical Committee on Health Research (SJ-421) and the Danish Data Protection Agency (REG-24-2015) approved the study.

### Strengths and limitations of this study:

- A strength of this study is that it is a population study in a socioeconomically-deprived area.
- It combines data on present depression scores and SEP with proportions of perceived barriers to accessing mental health care services.
- The study was done with patient participation.
- It is a limitation of this study that the questions used to assess barriers to accessing mental health care are not standardized.
- There was a potential overlap in the questions between transportation barriers and barriers of expenses related to seeking or continuing mental health care services.



## Introduction

Major depressive disorders (MDD) rank third among leading causes of years lived with disability (YLD) in high-income countries, as MDD is common and has an early onset.<sup>1</sup> Mental health problems in early age can have a profound impact on educational achievements<sup>2</sup>, on income<sup>3</sup>, and on later unemployment<sup>4</sup>. Additionally, having a diagnosis of depression is associated with a substantially shorter life expectancy<sup>5</sup>.

In spite of this, far from all people suffering from depression are treated. In a Norwegian survey study only 12% of respondents with symptoms of depression had ever sought help<sup>6</sup>, and a Canadian study found that 40% with symptoms of depression or anxiety perceived an unmet need for care<sup>7</sup>. Generally, treatment of patients suffering from depression is insufficient even in high-income countries, as only one in five receives adequate treatment<sup>8</sup>.

Depressive disorders are closely associated with socioeconomic position (SEP). A dose response relationship has been found between income as well as education on incidence, prevalence, and persistence of depression<sup>9</sup>. Likewise, studies have found negative socioeconomic changes increase the risk of incidents of mental disorders, particularly of mood disorders<sup>10</sup>, and financial strain in itself is associated with depressive disorder<sup>11</sup><sup>12</sup>.

Thus, people in low SEP may have a higher need for mental health care due to increased incidence and prevalence of depression. A recent study found predictors of need for highly-specialized MDD care to be: depression severity, younger age at onset, prior poor treatment response, psychiatric comorbidity, somatic comorbidity, childhood trauma, psychosocial impairment, older age, and a socioeconomically disadvantaged status<sup>13</sup>. Although people in low SEP have an increased need for mental health services, it is not evident that they use more specialized care. Some studies have found access to specialist care to be based on clinical need, with little inequity in SEP<sup>14</sup><sup>15</sup><sup>16</sup>, whereas others report specialized mental health services as psychologist or psychiatrists are not provided equally to persons in low SEP according to need<sup>17</sup><sup>18</sup><sup>7</sup><sup>19</sup> or that higher SEP is associated with more usage of specialized mental health services<sup>20</sup><sup>21</sup>.

The background for initiating the present study was that health care statistics (unpublished) in 2013 revealed a significant disparity, as 20% fewer individuals in the most socioeconomically deprived municipality in Denmark (Lolland) had been in contact with out-patient mental health care (psychologist, private, or public psychiatry) than could be expected for the population size (unpublished). Several reasons may account for this discrepancy between expected higher need in a deprived area and actual use of mental health care services, one of them being perceptions of barriers that affect patients' choices or preferences, which we aimed to address in this study.

1  
2  
3  
4 The study objective was to evaluate if perceived barriers to accessing mental health care differ across  
5 individuals with symptoms of depression according to SEP. We thereby expected to gain knowledge valuable to  
6 addressing inequality in the use of mental health care services.  
7

## 8 **Method**

### 9 *Study design*

10 The study was conducted as a cross-sectional questionnaire-based population survey.  
11  
12

### 13 *Setting*

14 The Danish health care system is tax-funded and free at delivery for both primary and secondary care; for  
15 adults, dental care and psychotherapy are only partly subsidized<sup>22</sup>. The general practitioner (GP) fulfills a  
16 gatekeeper function, as specialized care is only free after GP referral. Psychotherapy by a psychologist is partly  
17 subsidized only for patients referred by a GP for specific conditions: reaction to specific traumatic events;  
18 moderate depression; and, specifically for citizens between 18 and 38 years old, moderate anxiety disorders. In  
19 2014, the out of pocket cost to individuals partly subsidised at time of service was equivalent to 52€ for the  
20 first consultation and 44€ for the following sessions<sup>23</sup>.  
21  
22  
23

### 24 ***Study population and data sources***

25 The Lolland-Falster Health Study (LOFUS) is a publicly funded population survey conducted in the two remote  
26 municipalities of Lolland and Guldborgsund, located in a socioeconomically deprived area of Denmark that is a  
27 1½-2 hours' drive south from the capital Copenhagen. In the 2017 national ranking of all 98 municipalities  
28 these two were ranked the most deprived and the 8<sup>th</sup> most deprived municipalities<sup>24</sup>. Together, the  
29 municipalities comprise 103,000 citizens, 50% being 50 years of age or older<sup>25</sup> in 2017. The study aims to enroll  
30 25,000 participants of all ages and is conducted from 2016 to 2020. Participants are randomly selected by civil  
31 registration numbers<sup>26</sup>, invited by mail, and re-invited by phone. The study covers several health areas: mental  
32 health, health literacy, social issues, genetics, kidney, ear nose & throat problems, and more. Beyond  
33 questionnaire responses, LOFUS data contains blood samples and biometrics. The study is described in detail  
34 elsewhere<sup>27</sup>. The present study relies on responses to the questionnaire from adults, with data drawn from  
35 LOFUS at the end of 2017, while data collection was still ongoing.  
36  
37  
38  
39  
40

41 The subjects included in this study are respondents with symptoms of depression. All respondents who scored  
42 >20 on the Major Depression Inventory (MDI) were prompted the specific questions on perceived barriers to  
43 seeking help for mental health problems, which are described below.  
44

### 45 ***Independent variables***

#### 46 *Major Depression Inventory*

47 As part of the LOFUS questionnaire, the respondents filled out the Major Depression Inventory (MDI). The MDI  
48 is based on the 12-item Likert scale and has been found to have an adequate internal and external validity for  
49 defining different stages of depression<sup>28</sup>. The MDI is based on the ICD-10 diagnostic criteria for depressive  
50 disorder<sup>29</sup>, with scores ranging from 0 to 50. We used the sum score after excluding the lowest score on  
51 question 8 or 9 and likewise the lowest score on item 11 or 12, which measured increased/decreased  
52 restlessness and increased/decreased appetite, respectively<sup>30</sup>. Mild depression is covered by scores from 21 –  
53  
54  
55  
56  
57  
58  
59  
60

1  
2  
3  
4 25, moderate depression from 26 – 30 and severe depression by scores from 31 – 50<sup>31</sup>. If more than two items  
5 were missing in the MDI, the score was categorized as missing<sup>32</sup>.  
6  
7

### 8 *Socioeconomic position*

9 SEP was measured by employment status, educational attainment, and financial strain. Usually income status  
10 is included as measure of SEP but information on income was not an item in the questionnaire. Financial strain  
11 is not the optimal measurement of SEP; however, it has been found to be associated with having a depressive  
12 and/or anxiety disorder, above the effect of income, and to be negatively but not strongly correlated with  
13 income ( $r=-0.41$ ,  $p<0.001$ )<sup>11</sup>.  
14  
15

16  
17 Employment status was gathered using 14 different items in the questionnaire. Respondents over the age of 67  
18 were categorized as retired, unless they were employed. The categories of employment were reduced to four  
19 in the analyses: Working (employee; self-employed; combined employee and self-employed; military;  
20 secondary school pupil; postsecondary student; apprentice; house-wife/husband); Temporary not working  
21 (unemployed; rehabilitation; sickness leave 3 months or more); Retired (retired due to age; disability benefit;  
22 early retirement); and Other (Other).  
23  
24

25 Educational attainment was measured and classified as the following: *no postsecondary education* if the  
26 respondent did not complete any postsecondary education; *1-3 years postsecondary education* for vocational  
27 or academy/professional graduates of 1 - 3 years; *3+ postsecondary education* for baccalaureate matriculants  
28 who completed 3 - 4 years; and *academic* for those who completed graduate study of  $\geq 5$  years.  
29  
30

31 The questionnaire gathered responses concerning financial strain with the following question: *How often*  
32 *within the last 12 months have you had problems paying your bills?* With possible answers: *Never; Few months;*  
33 *Approximately half the months in the year; Every month.* In the analysis, the categories were reduced to three  
34 to gain power, merging *Approximately half the months in the year* and *Every month* into one category.  
35  
36

### 37 **Extrinsic variables:**

38 Sociodemographic variables included were gender, age, marital status, and cohabitation.  
39  
40

41 Questions on *Self-perceived general health* (SRH) were provided to respondents with a five-point Likert scale  
42 from *very good* to *very bad*. In addition, the presence of a *Long-standing health problem* was posed as a binary  
43 question and *General activity limitation* was gauged in three grades from *severely limited* to *not at all*. These  
44 questions were adopted from the European Health Status Module<sup>33</sup>.  
45  
46

47 The questionnaire included inquiries regarding past and present medical problems; specifically concerning  
48 mental health status, the respondents were asked if they presently suffered or had ever suffered from anxiety  
49 disorder and/or depression.  
50

### 51 **Dependent variables**

52 We developed a short list of questions to be included in the LOFUS questionnaire for respondents who scored  
53 positive for symptoms of depression. The questions were inspired by the *Barriers to Access to Care Evaluation*  
54  
55  
56  
57  
58  
59

1  
2  
3  
4 questionnaire by Sara Clement et al.<sup>34</sup>. Their questionnaire contains 30 items, which was too many to include in  
5 the LOFUS study (see supplementary table 1). The number of questions was reduced and grouped to cover the  
6 individual abilities in approaching care as described by Levesque et al.<sup>35</sup>: ability to perceive; ability to seek;  
7 ability to reach; ability to pay; and ability to engage (see further description in the supplementary material,  
8 Figure 1). A preliminary question on whether considering seeking care had ever been a problem was prompted  
9 before the five questions related to the abilities/perceived barriers:  
10  
11

12 *Have any of the reasons listed below prevented, delayed, or discouraged you from getting or continuing*  
13 *professional care for a mental health problem?*

14 *It has had an impact, that I ..*

- 15 1) ... have been unsure what to do to get professional care. (termed "Knowledge" in the following)
- 16 2) ... have been concerned for what others might think, say or do. (termed "Stigma")
- 17 3) ... have had difficulty with transport or travelling for treatment. (termed "Transport")
- 18 4) ... have not been able to afford the expenses that followed. (termed "Expense")
- 19 5) ... have had bad experiences with professional care for mental health problems. (termed "Experience")
- 20 6) These questions are not relevant for me/I do not want to answer.

21  
22  
23  
24 Answers to question 1 – 5 were listed in four grades ranging from *Not at all* to *Quite a lot*; question 6 was  
25 binary.

26  
27 In a preliminary form, the questions were evaluated for content validity in a focus group interview consisting of  
28 a group of ten patients and relatives of psychiatric patients (the Panel of Relatives and Patients of Psychiatry  
29 Services in Region Zealand) in December 2014. The group found the themes relevant and the questions  
30 understandable. They offered some suggestions for rephrasing, which were subsequently followed. The same  
31 panel commented on the preliminary results of the study in December 2017.

### 32 33 34 **Statistical analysis**

35 For respondents with symptoms of depression we estimated the association between SEP and the outcome  
36 variables (five types of barriers to MHC: knowledge; stigma; transport; expense; experience) in separate  
37 multivariable logistic regression models after excluding respondents replying *Not relevant*. Likewise, we  
38 performed the same analyses with the three grades of depression (mild, moderate and severe) and depression  
39 score uncategorized (MDI score) as independent variables, which is presented as supplementary material. The  
40 SEP categories were employment status, education, and financial strain. *Working, postsecondary education,*  
41 *and no economic distress* were used as reference categories.

42  
43  
44  
45  
46 The logistic regression models were adjusted for age (18-59 versus 60+) and gender in addition to the variables  
47 studied in the univariate (crude) analysis.

48  
49 The significance level used was 5% throughout, and all reported confidence intervals were 95%. All statistical  
50 analyses were done in Stata 15<sup>36</sup>.

### ***Patient and Public Involvement***

The study objectives were discussed with the members of the Panel of Relatives and Patients of Psychiatry Services in Region Zealand along with the validation of the questions in December 2014. The preliminary results were discussed with the group again in December 2017. The final results were distributed to the group in February 2018 along with an invitation for additional comments. One member of the patient panel responded to the invitation and provided additional comments/discussion. Comments from patients are included in the discussion.

The published article will also be distributed to the patient panel.

### **Ethics**

Informed, written consent was obtained from all participants. The study – along with the Lolland-Falster Health Study – was approved by Region Zealand's Ethical Committee on Health Research (SJ-421) and the Danish Data Protection Agency (REG-24-2015).

### **Results**

Figure 1: Flow chart of sampling

#### *Sampling from Lolland-Falster Health Study*

By December 21, 2017, a total of 20,680 adults (age 18+) had been invited to the LOFUS study. By December 31, 2017, a total of 5,395 adults had replied to the questionnaire. 319 did not reply on the MDI score element or failed to fill in more than two answers in the test, leaving 5,076, of whom 372 (7.3%) reported symptoms of depression and thus were prompted the questions on perceived barriers to seeking mental health care. 58 replied that the questions were not relevant or would not answer them, thus 314 individuals with a MDI score >20 were included in the analyses of SEP and perceived barriers (Figure 1).

Table 1. Characteristics of study sample and respondents with symptoms of depression

| Table 1. Characteristics of study sample and respondents with symptoms of depression (MDI >20) |              |             |             |      |               |            |
|------------------------------------------------------------------------------------------------|--------------|-------------|-------------|------|---------------|------------|
| Age group                                                                                      | Total sample |             |             |      | MDI score >20 |            |
|                                                                                                | Male         | Female      | Total       | %    | N             | %          |
| 18-29                                                                                          | 198          | 212         | 410         | 8.1  | 55            | 13.4       |
| 30-39                                                                                          | 180          | 250         | 430         | 8.5  | 41            | 9.5        |
| 40-49                                                                                          | 357          | 443         | 800         | 15.8 | 82            | 10.3       |
| 50-59                                                                                          | 519          | 681         | 1200        | 23.6 | 84            | 7.0        |
| 60-69                                                                                          | 632          | 666         | 1298        | 25.6 | 63            | 4.9        |
| 70-79                                                                                          | 396          | 371         | 767         | 15.1 | 41            | 5.3        |
| 80+                                                                                            | 95           | 76          | 171         | 3.4  | 6             | 3.5        |
| <b>Sum</b>                                                                                     | <b>2377</b>  | <b>2699</b> | <b>5076</b> |      | <b>372</b>    | <b>7.3</b> |
| <b>Marital status</b>                                                                          |              |             |             |      |               |            |
| Married                                                                                        | 1538         | 1708        | 3246        | 64.5 | 181           | 5.6        |
| Partnership                                                                                    | 73           | 108         | 181         | 3.6  | 15            | 8.3        |
| Separated                                                                                      | 12           | 9           | 21          | 0.4  | 5             | 23.8       |
| Divorced                                                                                       | 169          | 195         | 364         | 7.2  | 31            | 8.5        |
| Widower                                                                                        | 59           | 164         | 223         | 4.4  | 11            | 4.9        |
| Not married                                                                                    | 509          | 487         | 996         | 19.8 | 122           | 12.2       |
| <b>Cohabiting</b>                                                                              |              |             |             |      |               |            |
| Yes                                                                                            | 1917         | 2141        | 4058        | 80.7 | 248           | 6.1        |
| <b>Secondary schooling</b>                                                                     |              |             |             |      |               |            |
| Studying                                                                                       | 20           | 34          | 54          | 1.1  | 5             | 9.3        |
| < 8 years                                                                                      | 290          | 203         | 493         | 9.7  | 35            | 7.1        |
| 8 - 9 years                                                                                    | 610          | 401         | 1011        | 19.9 | 87            | 8.6        |
| 10 - 11 years                                                                                  | 751          | 913         | 1664        | 32.8 | 112           | 6.7        |
| High school                                                                                    | 522          | 896         | 1418        | 27.9 | 89            | 6.3        |
| Other/foreign                                                                                  | 163          | 215         | 378         | 7.4  | 38            | 10.1       |
| <b>Postsecondary education</b>                                                                 |              |             |             |      |               |            |
| No postsecondary                                                                               | 415          | 529         | 944         | 18.6 | 112           | 11.9       |
| 1-3 years postsecondary                                                                        | 1307         | 1238        | 2545        | 50.1 | 172           | 6.8        |
| 3+ years postsecondary                                                                         | 495          | 784         | 1279        | 25.2 | 63            | 4.9        |
| Other                                                                                          | 143          | 122         | 265         | 5.2  | 21            | 7.9        |
| <b>Occupational status</b>                                                                     |              |             |             |      |               |            |
| Work/study                                                                                     | 1417         | 1526        | 2943        | 58.0 | 167           | 5.7        |
| Temp. No work                                                                                  | 68           | 121         | 189         | 3.7  | 63            | 33.3       |
| Retired                                                                                        | 843          | 966         | 1809        | 35.6 | 115           | 6.4        |
| Other                                                                                          | 47           | 77          | 124         | 2.4  | 27            | 21.8       |
| <b>Financial strain</b>                                                                        |              |             |             |      |               |            |
| Not at all                                                                                     | 2136         | 2404        | 4540        | 89.4 | 275           | 6.1        |
| Few months                                                                                     | 175          | 213         | 388         | 7.6  | 60            | 15.5       |
| Half the months                                                                                | 23           | 22          | 45          | 0.9  | 13            | 28.9       |
| Every month                                                                                    | 25           | 32          | 57          | 1.1  | 19            | 33.3       |
| <b>Self-rated health</b>                                                                       |              |             |             |      |               |            |
| Very good                                                                                      | 306          | 328         | 634         | 12.5 | 7             | 1.1        |
| Good                                                                                           | 1348         | 1524        | 2872        | 56.6 | 83            | 2.9        |
| Fair                                                                                           | 616          | 697         | 1313        | 25.9 | 181           | 13.8       |
| Bad                                                                                            | 89           | 137         | 226         | 4.5  | 90            | 39.8       |
| Very bad                                                                                       | 12           | 6           | 18          | 0.4  | 9             | 50.0       |
| <b>General activity limitation</b>                                                             |              |             |             |      |               |            |
| Not limited at all                                                                             | 1561         | 1630        | 3191        | 63.2 | 114           | 3.6        |
| Limited but not severely                                                                       | 672          | 906         | 1578        | 31.3 | 166           | 10.5       |
| Severely limited                                                                               | 132          | 146         | 278         | 5.5  | 88            | 31.7       |
| <b>Longstanding illness. Yes</b>                                                               | 1052         | 1200        | 2252        | 44.7 | 244           | 10.8       |
| <b>Anxiety, now or earlier. Yes</b>                                                            | 110          | 223         | 333         | 6.6  | 111           | 33.3       |
| <b>Depression, now or earlier. Yes</b>                                                         | 145          | 230         | 375         | 7.4  | 138           | 36.8       |
| <b>Medication anxiety. Yes</b>                                                                 | 71           | 119         | 190         | 3.8  | 65            | 34.2       |
| <b>Medication antidepressants. Yes</b>                                                         | 85           | 173         | 258         | 5.1  | 66            | 25.6       |

1  
2  
3  
4  
5  
6 The total sample consisted of 53% women; 64.5% of the respondents were married, and 80.7% were  
7 cohabitating. For the total group, mean age was 55.7 and median age was 57.4; for individuals scoring in the  
8 depressed range on the MDI, the mean age was 50.2 and the median was 51.4 years.  
9

10  
11 Compared to the total sample, the respondents reporting symptoms of depression were younger, and more  
12 likely to be living alone, and to be unmarried (Table 1). They were also more likely to have no postsecondary  
13 education, to be temporarily out of work of whom 33% had symptoms, and to experience more frequent  
14 financial strain. Furthermore, their health indicators included: lower self-rated health, more reports of limited  
15 physical functioning, more reports of long lasting disease, and former anxiety or depression diagnoses; and  
16 more reports to be currently in pharmacological treatment for these disorders.  
17  
18

19  
20 *Figure 2. Responses on perceived barriers to accessing mental health care, proportions*  
21

22  
23  
24 Of those responding to the questions, more than half perceived no problems at all in accessing professional  
25 care, least of all transport.  
26

27 Among those who did have concerns about accessing or continuing professional mental health care, *Expense*  
28 was the most common problem, as 30.1% indicated expenses had prevented, deterred, or delayed them either  
29 *Quite a lot* or *A lot* (both responses aggregated in the *Quite a lot +* category in Figure 2). Likewise, the second  
30 most common concern was related to *Stigma*, phrased in the questionnaire as “what others might think, say or  
31 do”, which was a serious concern for 22.3%; approximately the same proportion (21.2%) had concerns related  
32 to *Knowledge*, or how to find help for a mental health problem. Transport was not a problem for 78.6%, with  
33 only 11.7% reporting it negatively affected access.  
34  
35  
36

37 Perceived barriers to accessing health care by SEP are shown in Table 2 (crude numbers are shown in  
38 Supplementary Table 2). Perceptions of *Stigma* did not show any significant difference across the  
39 socioeconomic groups, however measured. *Lack of Knowledge* was a significant problem for respondents  
40 without postsecondary education compared to those who had completed some postsecondary education  
41 (adjusted odd ratio (aOR) 2.26 confidence interval (CI) 1.1- 4.6) and for respondents with occasional (*Few*  
42 *months*), but not regular, financial strain when compared to those with no financial strain. Low SEP as  
43 measured by educational level and financial strain was associated with perceived barriers concerning *Transport*  
44 and *Expense*; whereas low SEP measured by employment status alone was associated with concerns related to  
45 *Transport*. The retired respondents were more likely to perceive bad *Experience* with mental health services as  
46 a barrier to seeking or continuing MHC compared to respondents who were working. *Transport* showed the  
47 greatest disparity across the socioeconomic groups.  
48  
49  
50  
51  
52  
53  
54  
55  
56  
57  
58  
59  
60

Table 2. Adjusted odds ratios for perceived barriers for accessing MHC by three indicators of SEP

| Table 2. Adjusted odds ratios for five perceived barriers accessing mental health care by employment status, education, and financial strain |                   |              |               |     |                  |              |              |               |                  |              |              |               |
|----------------------------------------------------------------------------------------------------------------------------------------------|-------------------|--------------|---------------|-----|------------------|--------------|--------------|---------------|------------------|--------------|--------------|---------------|
| Stigma                                                                                                                                       | Employment status |              |               | n   | Education        |              |              | n             | Financial strain |              |              | n             |
|                                                                                                                                              | aOR               | CI           |               |     | aOR              | CI           |              |               | aOR              | CI           |              |               |
| Working                                                                                                                                      | 1                 |              |               | 291 | 3+ years         | 1            |              | 290           | Not at all       | 1            |              | 289           |
| Temp. Not working                                                                                                                            | .9201             | .4880        | 1.735         |     | 1-3 years        | 1.087        | .5740        | 2.058         | Few months       | .8994        | .4841        | 1.671         |
| Retired                                                                                                                                      | .6808             | .3420        | 1.356         |     | No postsecondary | 1.166        | .5833        | 2.332         | Half the time+   | 1.749        | .6933        | 4.410         |
| Other                                                                                                                                        | .3815             | .1431        | 1.017         |     | Other            | .6699        | .1969        | 2.279         |                  |              |              |               |
| <b>Knowledge</b>                                                                                                                             |                   |              |               |     |                  |              |              |               |                  |              |              |               |
| Working                                                                                                                                      | 1                 |              |               | 292 | 3+ years         | 1            |              | 291           | Not at all       | 1            |              | 290           |
| Temp. Not working                                                                                                                            | 1.204             | .6390        | 2.268         |     | 1-3 years        | 1.597        | .8309        | 3.070         | Few months       | <b>2.515</b> | <b>1.335</b> | <b>4.739</b>  |
| Retired                                                                                                                                      | .5003             | .2480        | 1.009         |     | No postsecondary | <b>2.263</b> | <b>1.115</b> | <b>4.592</b>  | Half the time+   | 2.372        | .9404        | 5.985         |
| Other                                                                                                                                        | .5004             | .1884        | 1.329         |     | Other            | <b>4.752</b> | <b>1.297</b> | <b>17.412</b> |                  |              |              |               |
| <b>Expense</b>                                                                                                                               |                   |              |               |     |                  |              |              |               |                  |              |              |               |
| Working                                                                                                                                      | 1                 |              |               | 289 | 3+ years         | 1            |              | 288           | Not at all       | 1            |              | 289           |
| Temp. Not working                                                                                                                            | 1.700             | .8911        | 3.323         |     | 1-3 years        | 1.835        | .9324        | 3.612         | Few months       | <b>4.268</b> | <b>2.172</b> | <b>8.385</b>  |
| Retired                                                                                                                                      | 1.537             | .7451        | 3.171         |     | No postsecondary | <b>2.773</b> | <b>1.336</b> | <b>5.757</b>  | Half the time+   | <b>9.623</b> | <b>2.708</b> | <b>34.194</b> |
| Other                                                                                                                                        | .7456             | .2822        | 1.970         |     | Other            | 2.031        | .5762        | 7.156         |                  |              |              |               |
| <b>Experience</b>                                                                                                                            |                   |              |               |     |                  |              |              |               |                  |              |              |               |
| Working                                                                                                                                      | 1                 |              |               | 287 | 3+ years         | 1            |              | 286           | Not at all       | 1            |              | 286           |
| Temp. Not working                                                                                                                            | .9581             | .4820        | 1.905         |     | 1-3 years        | 1.043        | .5392        | 2.019         | Few months       | 1.152        | .5999        | 2.212         |
| Retired                                                                                                                                      | <b>2.143</b>      | <b>1.024</b> | <b>4.485</b>  |     | No postsecondary | .6435        | .3073        | 1.347         | Half the time+   | 2.385        | .9685        | 5.874         |
| Other                                                                                                                                        | 1.531             | .5932        | 3.952         |     | Other            | .7503        | .2024        | 2.781         |                  |              |              |               |
| <b>Transport</b>                                                                                                                             |                   |              |               |     |                  |              |              |               |                  |              |              |               |
| Working                                                                                                                                      | 1                 |              |               | 290 | 3+ years         | 1            |              | 289           | Not at all       | 1            |              | 288           |
| Temp. Not working                                                                                                                            | <b>3.184</b>      | <b>1.463</b> | <b>6.931</b>  |     | 1-3 years        | 1.603        | .6502        | 3.954         | Few months       | 1.746        | .8392        | 3.634         |
| Retired                                                                                                                                      | <b>4.442</b>      | <b>1.900</b> | <b>10.384</b> |     | No postsecondary | <b>2.988</b> | <b>1.187</b> | <b>7.518</b>  | Half the time+   | <b>9.889</b> | <b>3.745</b> | <b>26.113</b> |
| Other                                                                                                                                        | 2.169             | .6948        | 6.773         |     | Other            | 1.019        | .1835        | 5.659         |                  |              |              |               |

Adjusted for: gender; age +/- 60; 95% confidence intervals (CI), significant results are marked in bold

SEP showed no association with any of the barriers or with years of schooling (not shown). Using depression as independent variable, we found that severity of depression (both measured as a categorical variable and a score) was associated with perceived barriers in relation to *Expense* and *Transport*, but not associated with any other perceived barriers (see Supplementary Material Table 3).

## Discussion

### Principal findings

In this study of perceived barriers to accessing mental health care by respondents with present symptoms of depression, we found that almost 1/3 of the respondents indicated that *Expense* related to accessing MHC was a considerable barrier; this perception was more prevalent among individuals without postsecondary education and individuals experiencing financial strain. Transport presented the least prevalent barrier in general; but on the other hand, transportation also presented the greatest and most consistent socioeconomic disparity across all measurements of SEP. Transport and expenses associated with accessing mental health care were a problem for disadvantaged individuals.

Stigma was an issue of concern for 22% of the respondents but did not vary significantly according to SEP, whereas lack of knowledge about how to get help was a significantly greater problem for individuals without postsecondary education as compared to individuals with postsecondary education.

Lack of knowledge about how get to help and bad experience were perceived as a problem for 1/5 of the individuals overall as well.



#### *Strengths and weaknesses of the study*

A strength of this study was its use of information from a population study from a deprived area in combination with data on present depression score, information on SEP, and perceived barriers to accessing MHC; by this design we were able to determine the significance of different barriers to access for potential MHC patients in a deprived area. We are not aware of similar studies.

A limitation in our study was that the items used as dependable variables were not fully validated; validation would be preferable in order to compare to other studies. The BACE-3, at 30 questions, was too extensive to use in the LOFUS study, which already consisted of close to 100 questions; this was also the reasoning behind our focus on five central concepts of barriers to access. The external validity of the questions is supported by the use of generally accepted and validated concepts of abilities and as such is comparable to other studies. The content validity was tested by the panel of patients and patients' relatives and the questions found to be sound, but in retrospect, might not measure the concept of self-efficacy very well. We used the answer *Not relevant/Do not want to reply* as an indicator that the individual preferred to handle problems without help. It would have been prudent, however, to ask a more direct question about perceptions of need for care; it is possible that some individuals did not find the question relevant because while they experienced mental health issues, they did not perceive a need for further care. We found no correlation between the answer to the question of relevance and SEP, except for retired respondents, who tended to state *Not relevant* less, compared to respondents working (not shown).

Another limitation was that the question about transport was not clearly separated from the question about perceived barriers in relation to expenses, as it was not specified whether expenses included transportation-related expenses. Thus, we have no clear distinction between whether *Transport* as a barrier is primarily a logistical or economical barrier, or some combination thereof.

#### *Comparison with other studies*

The total sample contained more respondents in the age group 50 – 69 and fewer in the age groups younger and older compared to the study population; additionally, as compared to the background population the LOFUS sample is over represented by individuals with *+3 years postsecondary education vs no postsecondary education* by almost 3:1, according to general population statistics drawn from Statistics Denmark<sup>25</sup>. For the total sample, questions on self-rated health (SRH) were rated higher in the sample than the national levels<sup>37</sup> even though long-lasting illness was more prevalent in the sample (44.7% compared to national rate of 35.6%)<sup>37</sup>; the rate of respondents with *severely limited physical functioning* was close to the national proportions<sup>38</sup>. The group with symptoms of depression had scores well below national levels in all health-related variables. The total sample may overrepresent the middle-aged to older part of the population, an issue seen in national surveys, too<sup>39</sup>.

7.3% had symptoms of depression when the summed MDI score was used, which is a considerably higher rate than found by any other survey in Denmark; however, a recent national survey reported that 7.0% adults suffer from depressed mood, including 7.8% in the Region of Zealand<sup>37</sup>. Eurostat reported a prevalence of 6.3% adults with depressive symptoms and 3% with major depression symptoms in Denmark<sup>40</sup>. In the present study, 225 respondents reported both a core symptom of depression *Most of the time* or more and a summed MDI score

1  
2  
3  
4 >20, equivalent to a MDD prevalence of 4.4%. A comparable study by Ellervik et al. found 2.5% with a summed  
5 MDI score >25; we found 3.8%<sup>41</sup>. The present data is a subsample from a population survey in a deprived area,  
6 which could explain the high rate of depression symptoms found.  
7

8  
9 We found perceived stigma to be of *Quite a lot* or *A lot of concern* for 20% of the respondents. This  
10 corresponds with findings in a systematic review, where overall 20 – 25% respondents in 44 studies reported  
11 stigma as a barrier to accessing mental health services<sup>42</sup>. Stigma showed no association to SEP in our data. We  
12 have not been able to verify this in other studies except for one Canadian study, which likewise found no  
13 association between years of education and experiencing stigma in mental health care. However, they did find  
14 perceived stigma more prevalent among respondents not working<sup>43</sup>. In the Panel of Relatives and Patients of  
15 Psychiatry Services of Region Zealand, it was said that patients with mental disorders, and their relatives, pull  
16 the curtains together when they meet with each other privately, and that patients are indeed concerned with  
17 what others might think.  
18  
19  
20

21 One in five respondents experienced *Knowledge* as a barrier and had doubts about what to do to get  
22 professional help. With free access to a GP in Denmark, and the GP universally understood to be the  
23 gatekeeper for referrals, this is puzzling. Among respondents with symptoms of depression, 138 reported  
24 former or present depression, and 35 of them (25%) still answered that they experienced *Knowledge* to be a  
25 barrier *Quite a lot* or *A lot* of the time. Of those with symptoms of depression and presently taking  
26 antidepressant medication, 8 (12%) had doubts about what to do to get help. This could be due to the nature  
27 of the disease, but we did not find support for this, as we found no association to *Knowledge* with the severity  
28 of symptoms of depression. However, a Canadian study on perceived unmet need by respondents with  
29 symptoms of anxiety or depression found high symptom scores were associated with a higher degree of unmet  
30 need<sup>7</sup>, and not knowing how or where to get help was the most reported reason. The Panel of Relatives and  
31 Patients of Psychiatry Services of Region Zealand was not very surprised by this finding: despite free access to a  
32 GP, one individual reported that he could not get a family-GP, but had to meet changing doctors in a regional  
33 clinic (due to lack of GP's in the area). Another mentioned the waiting time for an appointment with the GP  
34 could be weeks (due to lack of GP's).  
35  
36  
37  
38  
39

40 It could be argued that older people may be more reluctant to use MHC and feel more stigmatized by the need  
41 for psychotherapy<sup>44 45</sup>. We did not find support for this, as the retired group did not differ in perception of  
42 stigma from employed persons. Likewise, older retired persons might be less willing to pay for the expenses  
43 associated with treatment, but we did not find support for this either, as expense was not a significant barrier  
44 for the group retired compared to the group working.  
45  
46

47 Use of mental health care is sensitive to cost<sup>46</sup>, and especially so for persons in low SEP<sup>47</sup>. This corresponds with  
48 our findings that expenses associated with mental health care was considered a common barrier for seeking  
49 help and concern of almost 1/3 of our respondents, and by two- to five-fold more by respondents without  
50 postsecondary education or in financial strain. This knowledge is important when research has shown that  
51 financial strain is strongly associated with higher odds for depression<sup>11</sup> and for prescription of  
52 antidepressants<sup>48</sup>. A German study found that even with free access to a psychologist these services are used  
53  
54  
55  
56  
57  
58  
59  
60

1  
2  
3  
4 less by people in low SEP<sup>19</sup>, which could be explained in part by our findings; people without postsecondary  
5 education may have less knowledge of how to access professional MHC, thus leading to lower usage of  
6 available services.  
7

8  
9 Experience with former mental health care treatment made retired respondents more reluctant to seek MHC  
10 as compared to the working population. This may not necessarily be due to bad experiences with health care  
11 professionals, though stigmatization can be a problem in health services too<sup>49</sup>; reports of past experience as a  
12 barrier could also indicate bad experience with side effects from a medication. Our study was not designed to  
13 capture or explore this nuance. Retired individuals are more likely to have more experience with health care,  
14 and this group includes people receiving early retirement pensions, which could indicate a chronic illness  
15 leading to early retirement and thus more opportunities for more bad experiences. The patient panel  
16 questioned the respondents' experience with MHC, since the rates of bad past experiences were so low; one  
17 remarking: "Those who are really feeling bad have not participated in this survey". For the panel, bad  
18 experience was a common deterrent to MHC, which may indicate an important area of future study.  
19  
20  
21

22  
23 Transport was perceived to be a greater problem by persons in low SEP compared to individuals in high SEP.  
24 This aligns well with our previous findings of the impact of distance and SEP on MHC use by patients in  
25 antidepressant treatment<sup>21</sup>. However, the question was not well distinguished from the question on expenses.  
26 Difficulty with transport or travelling includes the time spent to reach services and coordinate with other  
27 obligations – taking care of family duties or take time off at work, etc. Reliance on infrequent or inadequate  
28 public transportation could also be a reason to answer positively to this question, but the study was not  
29 designed to capture information regarding public versus private transportation, e.g. The patient panel was  
30 surprised that transport was a minor issue for the respondents, since it was viewed by them to be both time-  
31 consuming and expensive.  
32  
33  
34  
35  
36  
37

### 38 *Meaning of the study and possible explanations and implication for policymakers*

39 The study aimed to evaluate if perceived barriers to accessing mental health care differ across individuals with  
40 symptoms of depression according to their SEP. The answer in this study is quite clear: lack of postsecondary  
41 education was linked to greater perceived barriers to mental health care and expenses are considered a barrier  
42 to mental health care for those with no postsecondary education and in financial strain. Low mental health  
43 literacy, defined as knowledge and beliefs about mental disorders which aid in their recognition, management  
44 and prevention<sup>50</sup>, could be a part of the explanation, since low mental health literacy is also associated with  
45 low SEP<sup>51</sup>. Thus, empowering the community to take action for better mental health literacy<sup>52</sup> can lead to  
46 increased help-seeking by individuals in low SEP. In Denmark, two programs on improving mental health  
47 literacy exist: Mental Health First Aid<sup>53</sup> and the ABC mental health initiative<sup>54</sup>, both adopted from Australia. An  
48 approach directed more specifically toward deprived areas within such programs might improve SEP equity in  
49 mental health care treatment.  
50  
51  
52  
53  
54  
55  
56  
57  
58  
59  
60

1  
2  
3  
4 Addressing barriers and easing access for the deprived is obviously necessary. Lack of postsecondary education  
5 is associated with greater prevalence of perception of barriers to mental health care, in addition to an  
6 increased prevalence of mood disorders. Clearly, our results showed that *Expense* is a barrier for people in low  
7 SEP, but as found in the German study<sup>19</sup>, people in low SEP use psychologists less frequently even with free  
8 access. Psychotherapy is associated with the ability to engage, which in itself could be more difficult if an  
9 individual struggles with social and economic problems on top of mental ones. In order to address these  
10 related barriers, the deprived and depressed probably have additional needs beyond medication and  
11 psychotherapy, such as social supports and social/domestic/workplace intervention.  
12  
13  
14

15  
16 In a future study it could be interesting to investigate the association between depression score, perceived  
17 barriers and use of MHC for a period after the score. Future research could also investigate which experiences  
18 cause retired respondents with symptoms of depression to hesitate to access mental health care. Further  
19 improvements and validation of a short form questionnaire as the present could be beneficial.  
20  
21  
22

### 23 **Author contributions**

24 AP conceived the research and developed and validated the questions on barriers supervised by AH. AP wrote  
25 the first draft of the manuscript assisted by LHH. AH, ES, and FBW contributed to the data analysis,  
26 interpretation of results and critical revision of the manuscript.  
27  
28  
29

### 30 **Acknowledgement**

31 With acknowledgement to the Panel of Relatives and Patients of Psychiatry Services of Region Zealand for  
32 contributing to validate the questions on perceived barriers and commenting on the outcomes, with special  
33 gratitude to Anja Bang. We thank LOFUS for providing the data and Randi Jepsen for kind support. We also  
34 thank the Health Research Foundation of Region Zealand for financial support and particularly former head  
35 nurse Tove Kjærbo for initiating the study.  
36  
37

38 Data sharing: No additional data available  
39  
40

### 41 **References**

- 42 1. Global, regional, and national incidence, prevalence, and years lived with disability for 328 diseases and  
43 injuries for 195 countries, 1990–2016: a systematic analysis for the Global Burden of Disease Study  
44 2016. *Lancet* 2017;390(10100):1211–59. doi: 10.1016/s0140-6736(17)32154-2 [published Online First:  
45 2017/09/19]
- 46 2. Elovainio M, Pulkki-Raback L, Jokela M, et al. Socioeconomic status and the development of depressive  
47 symptoms from childhood to adulthood: a longitudinal analysis across 27 years of follow-up in the  
48 Young Finns study. *Soc Sci Med* 2012;74(6):923–29. doi: S0277-9536(12)00021-4  
49 [pii];10.1016/j.socscimed.2011.12.017 [doi]
- 50 3. Asselmann E, Wittchen HU, Lieb R, et al. Sociodemographic, clinical, and functional long-term outcomes in  
51 adolescents and young adults with mental disorders. *Acta Psychiatr Scand* 2018;137(1):6–17. doi:  
52 10.1111/acps.12792 [published Online First: 2017/09/02]  
53  
54  
55  
56  
57  
58  
59  
60

4. Thielen K, Nygaard E, Andersen I, et al. Employment consequences of depressive symptoms and work demands individually and combined. *Eur J Public Health* 2014;24(1):34 - 39.
5. Laursen TM, Musliner KL, Benros ME, et al. Mortality and life expectancy in persons with severe unipolar depression. *J Affect Disord* 2016;193:203-7. doi: 10.1016/j.jad.2015.12.067. Epub;2016 Jan 6.:203-07.
6. Roness A, Mykletun A, Dahl AA. Help-seeking behaviour in patients with anxiety disorder and depression. *Acta Psychiatr Scand* 2005;111(1):51-58.
7. Dezetter A, Duhoux A, Menear M, et al. Reasons and Determinants for Perceiving Unmet Needs for Mental Health in Primary Care in Quebec. *Can J Psychiatry* 2015;60(6):284-93.
8. Thornicroft G, Chatterji S, Evans-Lacko S, et al. Undertreatment of people with major depressive disorder in 21 countries. *Br J Psychiatry* 2017;210(2):119-24.
9. Lorant V, Deliege D, Eaton W, et al. Socioeconomic inequalities in depression: a meta-analysis. *Am J Epidemiol* 2003;157(2):98-112.
10. Barbaglia MG, M. tH, Dorsselaer S, et al. Negative socioeconomic changes and mental disorders: a longitudinal study. *J Epidemiol Community Health* 2015;69(1):55-62.
11. Dijkstra-Kersten SM, Biesheuvel-Leliefeld KE, van der Wouden JC, et al. Associations of financial strain and income with depressive and anxiety disorders. *J Epidemiol Community Health* 2015:jech-205088.
12. Ahnquist J, Wamala SP. Economic hardships in adulthood and mental health in Sweden. The Swedish National Public Health Survey 2009. *BMC Public Health* 2011;11:788. doi: 10.1186/1471-2458-11-788.:788-11.
13. van Krugten FC, Kaddouri M, Goorden M, et al. Indicators of patients with major depressive disorder in need of highly specialized care: A systematic review. *PloS one* 2017;12(2):e0171659. doi: 10.1371/journal.pone.0171659 [published Online First: 2017/02/09]
14. Glozier N, Davenport T, Hickie IB. Identification and management of depression in Australian primary care and access to specialist mental health care. *Psychiatr Serv* 2012;63(12):1247-51. doi: 1392910 [pii];10.1176/appi.ps.201200017 [doi]
15. Dey M, Jorm AF. Social determinants of mental health service utilization in Switzerland. *Int J Public Health* 2017;62(1):85-93.
16. Boerema AM, Ten Have M, Kleiboer A, et al. Demographic and need factors of early, delayed and no mental health care use in major depression: a prospective study. *BMC psychiatry* 2017;17(1):367. doi: 10.1186/s12888-017-1531-8 [published Online First: 2017/11/18]
17. Vasiliadis HM, Tempier R, Lesage A, et al. General practice and mental health care: determinants of outpatient service use. *Can J Psychiatry* 2009;54(7):468-76.
18. Hansen AH, Høye A. Gender differences in the use of psychiatric outpatient specialist services in Tromsø, Norway are dependent on age: a population-based cross-sectional survey. *BMC Health Serv Res* 2015;15:. doi:10.1186/s12913-015-1146-z.:doi-1146.
19. Epping J, Muschik D, Geyer S. Social inequalities in the utilization of outpatient psychotherapy: analyses of registry data from German statutory health insurance. *Int J Equity Health* 2017;16(1):147-0644.
20. Evans-Lacko S, Aguilar-Gaxiola S, Al-Hamzawi A, et al. Socio-economic variations in the mental health treatment gap for people with anxiety, mood, and substance use disorders: results from the WHO World Mental Health (WMH) surveys. *Psychol Med* 2017:1-12. doi: 10.1017/s0033291717003336 [published Online First: 2017/11/28]
21. Packness A, Waldorff FB, Christensen RD, et al. Impact of socioeconomic position and distance on mental health care utilization: a nationwide Danish follow-up study. *Soc Psychiatry Psychiatr Epidemiol* 2017:10-1437. doi: doi: 10.1007/s00127-017-1437-2

22. Pedersen KM, Andersen JS, Sondergaard J. General practice and primary health care in Denmark. *J Am Board Fam Med* 2012;25 Suppl 1:S34-8. doi: 10.3122/jabfm.2012.02.110216.:S34-S38.
23. Larsen A. Psykologbehandling: [www.sundhed.dk](http://www.sundhed.dk); 2014 [updated 9/29/2014. Available from: [www.sundhed.dk/borger/sygdomme-a-aa/sociale-ydelser/sociale-ydelser/behandling/psykologbehandling/](http://www.sundhed.dk/borger/sygdomme-a-aa/sociale-ydelser/sociale-ydelser/behandling/psykologbehandling/)].
24. Ministry of Economics- and Interior. Key figures of municipalities [Public Database]. Økonomi- og Indenrigsministeriet; [Available from: [www.noegletal.dk](http://www.noegletal.dk) accessed 20/02/ 2018.
25. Statistics Denmark. StatBank Denmark [Public Database]. Statistics Denmark; [Available from: [www.statistikbanken.dk](http://www.statistikbanken.dk) accessed 11/11 2015.
26. Pedersen CB. The Danish Civil Registration System. *Scand J Public Health* 2011;39(7 Suppl):22-25.
27. Jepsen R, Egholm CL, Brodersen J, et al. Lolland-Falster Health Study: Study protocol for a household-based prospective cohort study. *Scand J Public Health* 2018:1403494818799613. doi: 10.1177/1403494818799613 [published Online First: 2018/09/18]
28. Olsen LR, Jensen DV, Noerholm V, et al. The internal and external validity of the Major Depression Inventory in measuring severity of depressive states. *Psychol Med* 2003;33(2):351-56.
29. World Health Organization. The ICD-10 Classification of Mental and Behavioural Disorders 1989.
30. Bech P, Rasmussen NA, Olsen LR, et al. The sensitivity and specificity of the Major Depression Inventory, using the Present State Examination as the index of diagnostic validity. *J Affect Disord* 2001;66(2-3):159-64. [published Online First: 2001/10/02]
31. Bech P, Timmerby N, Martiny K, et al. Psychometric evaluation of the Major Depression Inventory (MDI) as depression severity scale using the LEAD (Longitudinal Expert Assessment of All Data) as index of validity. *BMC Psychiatry* 2015;15:190. doi: 10.1186/s12888-015-0529-3.:190-0529.
32. Bech P. Clinical Psychometrics. First ed. Oxford: John Wiley & Sons, Ltd. 2012:153-53.
33. European Union. European Health Interview Survey (EHIS wave 2). Methodological manual. Methodologies and Working papers ed. Luxembourg: Eurostat 2013:1-202.
34. Clement S, Brohan E, Jeffery D, et al. Development and psychometric properties the Barriers to Access to Care Evaluation scale (BACE) related to people with mental ill health. *BMC Psychiatry* 2012;12:36. doi: 1471-244X-12-36 [pii];10.1186/1471-244X-12-36 [doi]
35. Levesque JF, Harris MF, Russell G. Patient-centred access to health care: conceptualising access at the interface of health systems and populations. *Int J Equity Health* 2013;12:18. doi: 10.1186/1475-9276-12-18.:18-12.
36. Stata Statistical Software: Release 15. [program]. 1 version: College Station,TX:StataCorp LP., 2017.
37. Sundhedsstyrelsen NBoH. [Health of the Danes - The National Health Profile]. In: Jensen HD, M; Ekholm, O; Christensen AI, ed. København, 2018:1-134.
38. Johnsen NFD, M.; Michelsen S.I.; Juel K. [Health profile of adults with impaired or reduced physical functioning]. In: Folkesundhed SIF, ed. København: Syddansk Universitet, 2014:1-134.
39. National Board of Health. [Mental Health of Adult Danes]. København: Sundhedsstyrelsen 2010.
40. European Union. Eurostat Luxembourg: European Commission; [Available from: <http://ec.europa.eu/eurostat/web/health/health-status-determinants/data/database> accessed 04/02 2018.
41. Ellervik C, Kvetny J, Christensen KS, et al. Prevalence of depression, quality of life and antidepressant treatment in the Danish General Suburban Population Study. *Nord J Psychiatry* 2014 doi: 10.3109/08039488.2013.877074 [doi]
42. Clement S, Schauman O, Graham T, et al. What is the impact of mental health-related stigma on help-seeking? A systematic review of quantitative and qualitative studies. *Psychol Med* 2015;45(1):11-27.

- 1  
2  
3  
4 43. Patten SB, Williams JV, Lavorato DH, et al. Perceived Stigma among Recipients of Mental Health Care in the  
5 General Canadian Population. *Canadian journal of psychiatry Revue canadienne de psychiatrie*  
6 2016;61(8):480-8. doi: 10.1177/0706743716639928 [published Online First: 2016/06/17]  
7  
8 44. Conner KO, Copeland VC, Grote NK, et al. Mental health treatment seeking among older adults with  
9 depression: the impact of stigma and race. *The American journal of geriatric psychiatry : official journal*  
10 *of the American Association for Geriatric Psychiatry* 2010;18(6):531-43. doi:  
11 10.1097/JGP.0b013e3181cc0366 [published Online First: 2010/03/12]  
12  
13 45. ten Have M, de Graaf R, Ormel J, et al. Are attitudes towards mental health help-seeking associated with  
14 service use? Results from the European Study of Epidemiology of Mental Disorders. *Soc Psychiatry*  
15 *Psychiatr Epidemiol* 2010;45(2):153-63.  
16  
17 46. Sevilla-Dedieu C, Kovess-Masfety V, Gilbert F, et al. Mental health care and out-of-pocket expenditures in  
18 Europe: results from the ESEMeD project. *J Ment Health Policy Econ* 2011;14(2):95-105.  
19  
20 47. Kiil A, Houlberg K. How does copayment for health care services affect demand, health and redistribution?  
21 A systematic review of the empirical evidence from 1990 to 2011. *Eur J Health Econ* 2014;15(8):813-28.  
22  
23 48. Ahnquist J, Wamala SP. Economic hardships in adulthood and mental health in Sweden. The Swedish  
24 National Public Health Survey 2009. *BMC Public Health* 2011;11:788. doi: 10.1186/1471-2458-11-788  
25  
26 49. Mood Disorders Society of Canada. Stigma and discrimination - as expressed by mental health  
27 professionals, 2007.  
28  
29 50. Jorm AF, Korten AE, Jacomb PA, et al. "Mental health literacy": a survey of the public's ability to recognise  
30 mental disorders and their beliefs about the effectiveness of treatment. *The Medical journal of*  
31 *Australia* 1997;166(4):182-6. [published Online First: 1997/02/17]  
32  
33 51. Dunn KI, Goldney RD, Grande ED, et al. Quantification and examination of depression-related mental health  
34 literacy. *Journal of evaluation in clinical practice* 2009;15(4):650-3. doi: 10.1111/j.1365-  
35 2753.2008.01067.x [published Online First: 2009/06/16]  
36  
37 52. Jorm AF. Mental health literacy: empowering the community to take action for better mental health. *The*  
38 *American psychologist* 2012;67(3):231-43. doi: 10.1037/a0025957 [published Online First: 2011/11/02]  
39  
40 53. Jensen KB, Morthorst BR, Vendsborg PB, et al. Effectiveness of Mental Health First Aid training in Denmark:  
41 a randomized trial in waitlist design. *Soc Psychiatry Psychiatr Epidemiol* 2016;51(4):597-606. doi:  
42 10.1007/s00127-016-1176-9 [published Online First: 2016/02/04]  
43  
44 54. Koushede V. Act-Belong-Comit: National Institute of Public Health; 2018 [Available from: <http://www.sifolkesundhed.dk/Forskning/Befolkningens%20sundhedstilstand/Mental%20sundhed/ABC%20for%20mental%20sundhed.aspx?lang=en> accessed 04.04 2018].  
45  
46  
47  
48  
49  
50  
51  
52  
53  
54  
55  
56  
57  
58  
59  
60

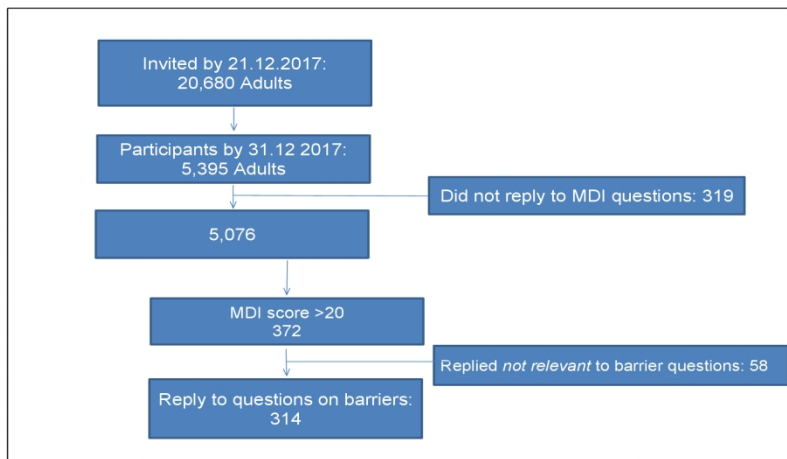

Figure 1. Sampling from the Lolland Falster Health Study

209x136mm (300 x 300 DPI)



1  
2  
3  
4  
5  
6  
7  
8  
9  
10  
11  
12  
13  
14  
15  
16  
17  
18  
19  
20  
21  
22  
23  
24  
25  
26  
27  
28  
29  
30  
31  
32  
33  
34  
35  
36  
37  
38  
39  
40  
41  
42  
43  
44  
45  
46  
47  
48  
49  
50  
51  
52  
53  
54  
55  
56  
57  
58  
59  
60

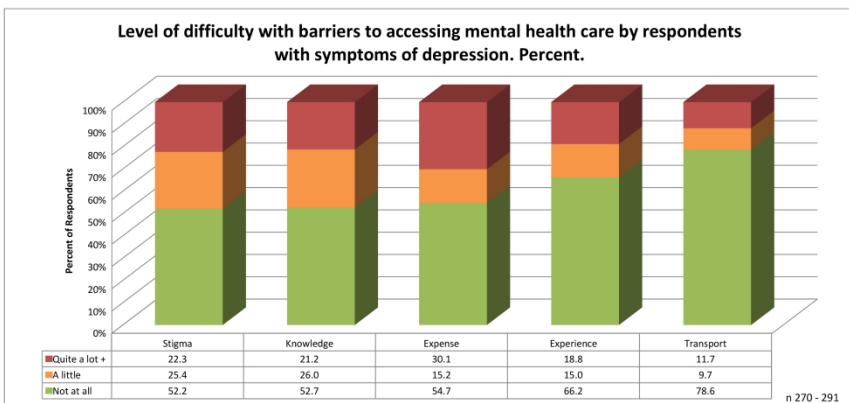

Figure 2. Responses on perceived barriers to accessing mental health care, proportions

331x175mm (300 x 300 DPI)

Socioeconomic position and perceived barriers to accessing mental health care by individuals with symptoms of depression: Results from the Lolland-Falster Health Study.

**Supplementary**

*Conceptual frame*

Patients’ choice of care will relate to personal preferences and abilities to access care. In a comprehensive theoretical approach by Levesque et al\* they combine several theories on access to health care and final treatment outcome. The model is patient-centered and based on service demand and service supply between which they describe the stepwise fulfilment of needs in the process from recognizing a health care need to a finalized treatment. The model has five central concepts associated with enforcing or inhibiting access on the supply-side, and five corresponding abilities on the demand-side, likewise with associated enforcing or inhibiting factors.

Figure 1: Model of a conceptual framework of access to health care\*



\* Levesque JF, Harris MF, Russell G. Patient-centred access to health care: conceptualising access at the interface of health systems and populations. *Int J Equity Health* 2013;12:18. doi: 10.1186/1475-9276-12-18.:18-12.

Socioeconomic position and perceived barriers to accessing mental health care by individuals with symptoms of depression:  
Results from the Lolland-Falster Health Study.

Table 1. Questionnaire

**Supplementary table: Condensation of the Barriers to Access to Care Evaluation scale (BACE v3)**

| Q no | BACE v3 Question                                                                                                           | Abilities # | Covered by question $\alpha$ |
|------|----------------------------------------------------------------------------------------------------------------------------|-------------|------------------------------|
| 1    | Being unsure where to go to get professional care                                                                          | Perceive    | 1                            |
| 2.   | Wanting to solve the problem on my own                                                                                     | Perceive    | (6)                          |
| 3.   | Concern that I might be seen as weak for having a mental health problem                                                    | Seek        | 2                            |
| 4.   | Fear of being put in hospital against my will                                                                              | Seek        | 2                            |
| 5.   | Concern that it might harm my chances when applying for jobs                                                               | Seek        | 2                            |
| 6.   | Problems with transport or travelling to appointments                                                                      | Reach       | 3                            |
| 7.   | Thinking the problem would get better by itself                                                                            | Perceive    |                              |
| 8.   | Concern about what my family might think or say                                                                            | Seek        | 2                            |
| 9.   | Feeling embarrassed or ashamed                                                                                             | Seek        | 2                            |
| 10.  | Preferring to get alternative forms of care (e.g. spiritual care, non-Western healing / medicine, complementary therapies) | Perceive    |                              |
| 11.  | Not being able to afford the financial costs involved                                                                      | Pay         | 4                            |
| 12.  | Concern that I might be seen as 'crazy'                                                                                    | Seek        | 2                            |
| 13.  | Thinking that professional care probably would not help                                                                    |             | (6)                          |
| 14.  | Concern that I might be seen as a bad parent                                                                               | Seek        | 2                            |
| 15.  | Professionals from my own ethnic or cultural group not being available                                                     |             |                              |
| 16.  | Being too unwell to ask for help                                                                                           |             |                              |
| 17.  | Concern that people I know might find out                                                                                  | Seek        | 2                            |
| 18.  | Dislike of talking about my feelings, emotions or thoughts                                                                 | Seek        |                              |
| 19.  | Concern that people might not take me seriously if they found out I was having professional care                           | Seek        | 2                            |
| 20.  | Concerns about the treatments available (e.g. medication side effects)                                                     | Perceive    |                              |
| 21.  | Not wanting a mental health problem to be on my medical records                                                            | Seek        | 2                            |
| 22.  | Having had previous bad experiences with professional care for mental health                                               | Engage      | 5                            |
| 23.  | Preferring to get help from family or friends                                                                              | Seek        |                              |
| 24.  | Concern that my children may be taken into care or that I may lose access or custody without my agreement                  | Seek        | 2                            |
| 25.  | Thinking I did not have a problem                                                                                          | Perceive    | 6                            |
| 26.  | Concern about what my friends might think or say                                                                           | Seek        | 2                            |
| 27.  | Difficulty taking time off work                                                                                            | Reach       |                              |
| 28.  | Concern about what people at work might think, say or do                                                                   | Seek        | 2                            |
| 29.  | Having problems with childcare while I receive professional care                                                           | Reach       | 3                            |
| 30.  | Having no one who could help me get professional care                                                                      | Reach       |                              |

Clement et al. *BMC Psychiatry* 2012, 12:36

Development and psychometric properties the Development and psychometric properties the Barriers to Access to Care Evaluation scale (BACE) - related to people with mental ill health

# According to model of Levesque et al. *International Journal for Equity in Health* 2013, 12:18

Patient-centered access to health care: conceptualizing access at the interface of health systems and populations

$\alpha$  The questions in the questionnaire of the present study

Socioeconomic position and perceived barriers to accessing mental health care by individuals with symptoms of depression: Results from the Lolland-Falster Health Study.

**Suppl. Table 2: Perceived barriers accessing MHC & symptoms of depression, crude numbers**

| <b>Stigma</b>     | <b>Mild</b> | <b>Mod.</b> | <b>Severe</b> | <b>Sum</b> | <b>Pct (resp)</b> |
|-------------------|-------------|-------------|---------------|------------|-------------------|
| Not at all        | 73          | 50          | 29            | 152        | 52,2              |
| A little          | 39          | 20          | 15            | 74         | 25,4              |
| Quite a lot       | 16          | 13          | 10            | 39         | 13,4              |
| A lot             | 10          | 6           | 10            | 26         | 8,9               |
| NA                | 11          | 6           | 6             | 23         |                   |
| <b>Sum</b>        | <b>149</b>  | <b>95</b>   | <b>70</b>     | <b>314</b> | <b>291</b>        |
| <b>Knowledge</b>  | <b>Mild</b> | <b>Mod.</b> | <b>Severe</b> | <b>Sum</b> | <b>Pct (resp)</b> |
| Not at all        | 77          | 50          | 27            | 154        | 52,7              |
| A little          | 41          | 21          | 14            | 76         | 26,0              |
| Quite a lot       | 20          | 13          | 16            | 49         | 16,8              |
| A lot             | 2           | 4           | 7             | 13         | 4,5               |
| NA                | 9           | 7           | 6             | 22         |                   |
| <b>Sum</b>        | <b>149</b>  | <b>95</b>   | <b>70</b>     | <b>314</b> | <b>292</b>        |
| <b>Expense</b>    | <b>Mild</b> | <b>Mod.</b> | <b>Severe</b> | <b>Sum</b> | <b>Pct (resp)</b> |
| Not at all        | 84          | 47          | 27            | 158        | 54,7              |
| A little          | 20          | 14          | 10            | 44         | 15,2              |
| Quite a lot       | 15          | 14          | 15            | 44         | 15,2              |
| A lot             | 18          | 13          | 12            | 43         | 14,9              |
| NA                | 12          | 7           | 6             | 25         |                   |
| <b>Sum</b>        | <b>149</b>  | <b>95</b>   | <b>70</b>     | <b>314</b> | <b>289</b>        |
| <b>Experience</b> | <b>Mild</b> | <b>Mod.</b> | <b>Severe</b> | <b>Sum</b> | <b>Pct (resp)</b> |
| Not at all        | 98          | 58          | 34            | 190        | 66,2              |
| A little          | 22          | 11          | 10            | 43         | 15,0              |
| Quite a lot       | 15          | 9           | 8             | 32         | 11,1              |
| A lot             | 4           | 10          | 8             | 22         | 7,7               |
| NA                | 10          | 7           | 10            | 27         |                   |
| <b>Sum</b>        | <b>149</b>  | <b>95</b>   | <b>70</b>     | <b>314</b> | <b>287</b>        |
| <b>Transport</b>  | <b>Mild</b> | <b>Mod.</b> | <b>Severe</b> | <b>Sum</b> | <b>Pct (resp)</b> |
| Not at all        | 117         | 66          | 45            | 228        | 78,6              |
| A little          | 10          | 11          | 7             | 28         | 9,7               |
| Quite a lot       | 6           | 4           | 9             | 19         | 6,6               |
| A lot             | 6           | 6           | 3             | 15         | 5,2               |
| NA                | 10          | 8           | 6             | 24         |                   |
| <b>Sum</b>        | <b>149</b>  | <b>95</b>   | <b>70</b>     | <b>314</b> | <b>290</b>        |

**Suppl. Table 3. Adjusted odds ratios for five perceived barriers accessing mental health care by severity of symptoms of depression**

| Dep. Grade | Stigma |             |     | Knowledge |              |     | Expense      |                    |     | Experience |             |     | Transport    |                    |     |
|------------|--------|-------------|-----|-----------|--------------|-----|--------------|--------------------|-----|------------|-------------|-----|--------------|--------------------|-----|
|            | aOR    | CI          | n   | aOR       | CI           | n   | aOR          | CI                 | n   | aOR        | CI          | n   | aOR          | CI                 | n   |
| Mild       | 1      |             | 291 | 1         |              | 292 | 1            |                    | 289 | 1          |             | 287 | 1            |                    | 290 |
| Moderate   | .8463  | .4903 1.461 |     | .9464     | .5510 16.256 |     | 1.350        | .7722 2.359        |     | 1.220      | .6854 2.172 |     | 1.684        | .8614 3.294        |     |
| Severe     | 1.259  | .6867 2.309 |     | 1.723     | .9420 3.151  |     | <b>2.043</b> | <b>1.097 3.804</b> |     | 1.739      | .9220 3.279 |     | <b>2.225</b> | <b>1.098 4.512</b> |     |
| MDI score# | 1.005  | .9628 1.050 |     | 1.030     | .9864 10.750 |     | <b>1.063</b> | <b>1.016 1.112</b> |     | 1.035      | .9891 1.083 |     | <b>1.076</b> | <b>1.024 1.130</b> |     |

Adjusted for: gender; age +/- 60; 95% confidence intervals (CI), marked bold  
 # Major Depression Inventory scale > 20 ≤ 50, ungrouped

STROBE Statement for the study: **Socioeconomic position and perceived barriers to access mental health care by individuals with symptoms of depression. Results from the Lolland-Falster Health Study.**

|                              | Item No | Recommendation                                                                                                                                                                                    | Addressed on page:                 |
|------------------------------|---------|---------------------------------------------------------------------------------------------------------------------------------------------------------------------------------------------------|------------------------------------|
| <b>Title and abstract</b>    | 1       | (a) Indicate the study's design with a commonly used term in the title or the abstract                                                                                                            | 4                                  |
|                              |         | (b) Provide in the abstract an informative and balanced summary of what was done and what was found                                                                                               | 2                                  |
| <b>Introduction</b>          |         |                                                                                                                                                                                                   |                                    |
| Background/rationale         | 2       | Explain the scientific background and rationale for the investigation being reported                                                                                                              | 3                                  |
| Objectives                   | 3       | State specific objectives, including any prespecified hypotheses                                                                                                                                  | 4                                  |
| <b>Methods</b>               |         |                                                                                                                                                                                                   |                                    |
| Study design                 | 4       | Present key elements of study design early in the paper                                                                                                                                           | 4                                  |
| Setting                      | 5       | Describe the setting, locations, and relevant dates, including periods of recruitment, exposure, follow-up, and data collection                                                                   | 5                                  |
| Participants                 | 6       | (a) Give the eligibility criteria, and the sources and methods of selection of participants. Describe methods of follow-up                                                                        | 5                                  |
|                              |         | (b) For matched studies, give matching criteria and number of exposed and unexposed                                                                                                               |                                    |
| Variables                    | 7       | Clearly define all outcomes, exposures, predictors, potential confounders, and effect modifiers. Give diagnostic criteria, if applicable                                                          | 5 - 6<br>Table 1                   |
| Data sources/<br>measurement | 8*      | For each variable of interest, give sources of data and details of methods of assessment (measurement). Describe comparability of assessment methods if there is more than one group              | 5 - 6<br><i>Supplement Table 1</i> |
| Bias                         | 9       | Describe any efforts to address potential sources of bias                                                                                                                                         |                                    |
| Study size                   | 10      | Explain how the study size was arrived at                                                                                                                                                         | 7 & Figure 1                       |
| Quantitative variables       | 11      | Explain how quantitative variables were handled in the analyses. If applicable, describe which groupings were chosen and why                                                                      | 5 - 6                              |
| Statistical methods          | 12      | (a) Describe all statistical methods, including those used to control for confounding                                                                                                             | 7                                  |
|                              |         | (b) Describe any methods used to examine subgroups and interactions                                                                                                                               |                                    |
|                              |         | (c) Explain how missing data were addressed                                                                                                                                                       |                                    |
|                              |         | (d) If applicable, explain how loss to follow-up was addressed                                                                                                                                    |                                    |
|                              |         | (e) Describe any sensitivity analyses                                                                                                                                                             |                                    |
| <b>Results</b>               |         |                                                                                                                                                                                                   |                                    |
| Participants                 | 13*     | (a) Report numbers of individuals at each stage of study—eg numbers potentially eligible, examined for eligibility, confirmed eligible, included in the study, completing follow-up, and analysed | 7                                  |
|                              |         | (b) Give reasons for non-participation at each stage                                                                                                                                              |                                    |
|                              |         | (c) Consider use of a flow diagram                                                                                                                                                                | Figure 1                           |
| Descriptive data             | 14*     | (a) Give characteristics of study participants (eg demographic, clinical, social) and information on exposures and potential confounders                                                          | Table 1                            |
|                              |         | (b) Indicate number of participants with missing data for each variable of interest                                                                                                               | Supplement table 2                 |
|                              |         | (c) Summarise follow-up time (eg, average and total amount)                                                                                                                                       |                                    |
| Outcome data                 | 15*     | Report numbers of outcome events or summary measures over time                                                                                                                                    |                                    |

|    |                          |    |                                                                                                                                                                                                              |                        |
|----|--------------------------|----|--------------------------------------------------------------------------------------------------------------------------------------------------------------------------------------------------------------|------------------------|
| 1  | Main results             | 16 | (a) Give unadjusted estimates and, if applicable, confounder-adjusted estimates and their precision (eg, 95% confidence interval). Make clear which confounders were adjusted for and why they were included | Table 3<br>Table 4 + 5 |
| 2  |                          |    | (b) Report category boundaries when continuous variables were categorized                                                                                                                                    | 5                      |
| 3  |                          |    | (c) If relevant, consider translating estimates of relative risk into absolute risk for a meaningful time period                                                                                             |                        |
| 4  | Other analyses           | 17 | Report other analyses done—eg analyses of subgroups and interactions, and sensitivity analyses                                                                                                               |                        |
| 5  | <b>Discussion</b>        |    |                                                                                                                                                                                                              |                        |
| 6  | Key results              | 18 | Summarise key results with reference to study objectives                                                                                                                                                     | 10                     |
| 7  | Limitations              | 19 | Discuss limitations of the study, taking into account sources of potential bias or imprecision. Discuss both direction and magnitude of any potential bias                                                   | 10-11                  |
| 8  | Interpretation           | 20 | Give a cautious overall interpretation of results considering objectives, limitations, multiplicity of analyses, results from similar studies, and other relevant evidence                                   | 11-12                  |
| 9  | Generalisability         | 21 | Discuss the generalisability (external validity) of the study results                                                                                                                                        | 11                     |
| 10 | <b>Other information</b> |    |                                                                                                                                                                                                              |                        |
| 11 | Funding                  | 22 | Give the source of funding and the role of the funders for the present study and, if applicable, for the original study on which the present article is based                                                | 1 & 5                  |

\*Give information separately for exposed and unexposed groups.

**Note:** An Explanation and Elaboration article discusses each checklist item and gives methodological background and published examples of transparent reporting. The STROBE checklist is best used in conjunction with this article (freely available on the Web sites of PLoS Medicine at <http://www.plosmedicine.org/>, Annals of Internal Medicine at <http://www.annals.org/>, and Epidemiology at <http://www.epidem.com/>). Information on the STROBE Initiative is available at <http://www.strobe-statement.org>.
