# Supplementary material for: Are perceived barriers to accessing mental healthcare associated with socioeconomic position among individuals with symptoms of depression? Questionnaire-results from the Lolland-Falster Health Study, a rural Danish population study
Source: PubMed Central journal article supplement — BMJ Open. 2019 Mar 15;9(3):e023844. doi: 10.1136/bmjopen-2018-023844 (PMC6429864; doi:10.1136/bmjopen-2018-023844), 2019-03-15
Supplement: bmjopen-2018-023844supp001.pdf [file bmjopen-2018-023844supp001.pdf]

## Supplementary

### Conceptual frame

Patients' choice of care will relate to personal preferences and abilities to access care. In a comprehensive theoretical approach by Levesque et al\* they combine several theories on access to health care and final treatment outcome. The model is patient-centered and based on service demand and service supply between which they describe the stepwise fulfilment of needs in the process from recognizing a health care need to a finalized treatment. The model has five central concepts associated with enforcing or inhibiting access on the supply-side, and five corresponding abilities on the demand-side, likewise with associated enforcing or inhibiting factors.

Figure 1: Model of a conceptual framework of access to health care\*

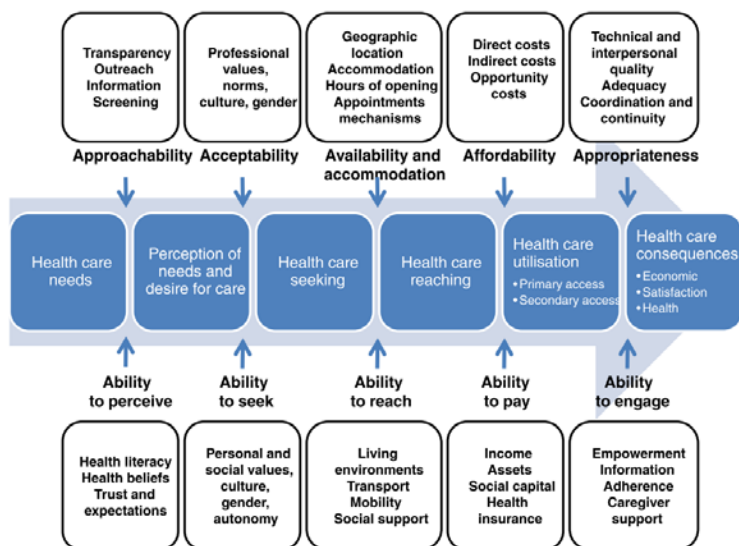

\* Levesque JF, Harris MF, Russell G. Patient-centred access to health care: conceptualising access at the interface of health systems and populations. *Int J Equity Health* 2013;12:18. doi: 10.1186/1475-9276-12-18.:18-12.

Table 1. Questionnaire

**Supplementary table: Condensation of the Barriers to Access to Care Evaluation scale (BACE v3)**

| Q no | BACE v3 Question                                                                                                           | Abilities # | Covered by question $\alpha$ |
|------|----------------------------------------------------------------------------------------------------------------------------|-------------|------------------------------|
| 1    | Being unsure where to go to get professional care                                                                          | Perceive    | 1                            |
| 2.   | Wanting to solve the problem on my own                                                                                     | Perceive    | (6)                          |
| 3.   | Concern that I might be seen as weak for having a mental health problem                                                    | Seek        | 2                            |
| 4.   | Fear of being put in hospital against my will                                                                              | Seek        | 2                            |
| 5.   | Concern that it might harm my chances when applying for jobs                                                               | Seek        | 2                            |
| 6.   | Problems with transport or travelling to appointments                                                                      | Reach       | 3                            |
| 7.   | Thinking the problem would get better by itself                                                                            | Perceive    |                              |
| 8.   | Concern about what my family might think or say                                                                            | Seek        | 2                            |
| 9.   | Feeling embarrassed or ashamed                                                                                             | Seek        | 2                            |
| 10.  | Preferring to get alternative forms of care (e.g. spiritual care, non-Western healing / medicine, complementary therapies) | Perceive    |                              |
| 11.  | Not being able to afford the financial costs involved                                                                      | Pay         | 4                            |
| 12.  | Concern that I might be seen as 'crazy'                                                                                    | Seek        | 2                            |
| 13.  | Thinking that professional care probably would not help                                                                    |             | (6)                          |
| 14.  | Concern that I might be seen as a bad parent                                                                               | Seek        | 2                            |
| 15.  | Professionals from my own ethnic or cultural group not being available                                                     |             |                              |
| 16.  | Being too unwell to ask for help                                                                                           |             |                              |
| 17.  | Concern that people I know might find out                                                                                  | Seek        | 2                            |
| 18.  | Dislike of talking about my feelings, emotions or thoughts                                                                 | Seek        |                              |
| 19.  | Concern that people might not take me seriously if they found out I was having professional care                           | Seek        | 2                            |
| 20.  | Concerns about the treatments available (e.g. medication side effects)                                                     | Perceive    |                              |
| 21.  | Not wanting a mental health problem to be on my medical records                                                            | Seek        | 2                            |
| 22.  | Having had previous bad experiences with professional care for mental health                                               | Engage      | 5                            |
| 23.  | Preferring to get help from family or friends                                                                              | Seek        |                              |
| 24.  | Concern that my children may be taken into care or that I may lose access or custody without my agreement                  | Seek        | 2                            |
| 25.  | Thinking I did not have a problem                                                                                          | Perceive    | 6                            |
| 26.  | Concern about what my friends might think or say                                                                           | Seek        | 2                            |
| 27.  | Difficulty taking time off work                                                                                            | Reach       |                              |
| 28.  | Concern about what people at work might think, say or do                                                                   | Seek        | 2                            |
| 29.  | Having problems with childcare while I receive professional care                                                           | Reach       | 3                            |
| 30.  | Having no one who could help me get professional care                                                                      | Reach       |                              |

Clement et al. BMC Psychiatry 2012, 12:36

Development and psychometric properties the Development and psychometric properties the Barriers to Access to Care Evaluation scale (BACE) - related to people with mental ill health

# According to model of Levesque et al. International Journal for Equity in Health 2013, 12:18  
Patient-centered access to health care: conceptualizing access at the interface of health systems and populations

$\alpha$  The questions in the questionnaire of the present study

Socioeconomic position and perceived barriers to accessing mental health care by individuals with symptoms of depression:  
Results from the Lolland-Falster Health Study.

**Suppl. Table 2: Perceived barriers accessing MHC & symptoms of depression, crude numbers**

| <b>Stigma</b>     | <b>Mild</b> | <b>Mod.</b> | <b>Severe</b> | <b>Sum</b> | <b>Pct (resp)</b> |
|-------------------|-------------|-------------|---------------|------------|-------------------|
| Not at all        | 73          | 50          | 29            | 152        | 52,2              |
| A little          | 39          | 20          | 15            | 74         | 25,4              |
| Quite a lot       | 16          | 13          | 10            | 39         | 13,4              |
| A lot             | 10          | 6           | 10            | 26         | 8,9               |
| NA                | 11          | 6           | 6             | 23         |                   |
| <b>Sum</b>        | <b>149</b>  | <b>95</b>   | <b>70</b>     | <b>314</b> | <b>291</b>        |
| <b>Knowledge</b>  | <b>Mild</b> | <b>Mod.</b> | <b>Severe</b> | <b>Sum</b> | <b>Pct (resp)</b> |
| Not at all        | 77          | 50          | 27            | 154        | 52,7              |
| A little          | 41          | 21          | 14            | 76         | 26,0              |
| Quite a lot       | 20          | 13          | 16            | 49         | 16,8              |
| A lot             | 2           | 4           | 7             | 13         | 4,5               |
| NA                | 9           | 7           | 6             | 22         |                   |
| <b>Sum</b>        | <b>149</b>  | <b>95</b>   | <b>70</b>     | <b>314</b> | <b>292</b>        |
| <b>Expense</b>    | <b>Mild</b> | <b>Mod.</b> | <b>Severe</b> | <b>Sum</b> | <b>Pct (resp)</b> |
| Not at all        | 84          | 47          | 27            | 158        | 54,7              |
| A little          | 20          | 14          | 10            | 44         | 15,2              |
| Quite a lot       | 15          | 14          | 15            | 44         | 15,2              |
| A lot             | 18          | 13          | 12            | 43         | 14,9              |
| NA                | 12          | 7           | 6             | 25         |                   |
| <b>Sum</b>        | <b>149</b>  | <b>95</b>   | <b>70</b>     | <b>314</b> | <b>289</b>        |
| <b>Experience</b> | <b>Mild</b> | <b>Mod.</b> | <b>Severe</b> | <b>Sum</b> | <b>Pct (resp)</b> |
| Not at all        | 98          | 58          | 34            | 190        | 66,2              |
| A little          | 22          | 11          | 10            | 43         | 15,0              |
| Quite a lot       | 15          | 9           | 8             | 32         | 11,1              |
| A lot             | 4           | 10          | 8             | 22         | 7,7               |
| NA                | 10          | 7           | 10            | 27         |                   |
| <b>Sum</b>        | <b>149</b>  | <b>95</b>   | <b>70</b>     | <b>314</b> | <b>287</b>        |
| <b>Transport</b>  | <b>Mild</b> | <b>Mod.</b> | <b>Severe</b> | <b>Sum</b> | <b>Pct (resp)</b> |
| Not at all        | 117         | 66          | 45            | 228        | 78,6              |
| A little          | 10          | 11          | 7             | 28         | 9,7               |
| Quite a lot       | 6           | 4           | 9             | 19         | 6,6               |
| A lot             | 6           | 6           | 3             | 15         | 5,2               |
| NA                | 10          | 8           | 6             | 24         |                   |
| <b>Sum</b>        | <b>149</b>  | <b>95</b>   | <b>70</b>     | <b>314</b> | <b>290</b>        |

**Suppl. Table 3. Adjusted odds ratios for five perceived barriers accessing mental health care by severity of symptoms of depression**

| Dep. Grade | Stigma |       |       | n   | Knowledge |       |        | n   | Expense      |              |              | n   | Experience |       |       | n   | Transport    |              |              | n   |
|------------|--------|-------|-------|-----|-----------|-------|--------|-----|--------------|--------------|--------------|-----|------------|-------|-------|-----|--------------|--------------|--------------|-----|
|            | aOR    | CI    |       |     | aOR       | CI    |        |     | aOR          | CI           |              |     | aOR        | CI    |       |     | aOR          | CI           |              |     |
| Mild       | 1      |       |       | 291 | 1         |       |        | 292 | 1            |              |              | 289 | 1          |       |       | 287 | 1            |              |              | 290 |
| Moderate   | .8463  | .4903 | 1.461 |     | .9464     | .5510 | 16.256 |     | 1.350        | .7722        | 2.359        |     | 1.220      | .6854 | 2.172 |     | 1.684        | .8614        | 3.294        |     |
| Severe     | 1.259  | .6867 | 2.309 |     | 1.723     | .9420 | 3.151  |     | <b>2.043</b> | <b>1.097</b> | <b>3.804</b> |     | 1.739      | .9220 | 3.279 |     | <b>2.225</b> | <b>1.098</b> | <b>4.512</b> |     |
| MDI score# | 1.005  | .9628 | 1.050 |     | 1.030     | .9864 | 10.750 |     | <b>1.063</b> | <b>1.016</b> | <b>1.112</b> |     | 1.035      | .9891 | 1.083 |     | <b>1.076</b> | <b>1.024</b> | <b>1.130</b> |     |

Adjusted for: gender; age +/- 60; 95% confidence intervals (CI), marked bold  
# Major Depression Inventory scale > 20 ≤ 50, ungrouped
